# Supplementary material for: Genome sequencing and analysis of the first complete genome of Lactobacillus kunkeei strain MP2, an Apis mellifera gut isolate
Source: PeerJ. 2016 Apr 19;4:e1950. doi: 10.7717/peerj.1950 (PMC4841242; doi:10.7717/peerj.1950)
Supplement: Table S1 — Detailed information for each predicted CDS of L. kunkeei MP2, against the EggNOG database. [file peerj-04-1950-s001.xlsx]

## Sheet: Sheet1
Locus	EGGNOG Number	Evalue	Description	EggNOG category	EggNOG category description
mp2_00216	ENOG410YMGN	1.4e-41	of the drug metabolite transporter, DMT superfamily	S	Function unknown
mp2_00217	COG1316	8.3e-94	transcriptional	K	Transcription
mp2_00214	COG3579	4.7e-191	aminopeptidase c	E	Amino acid transport and metabolism
mp2_00215	COG0588	3.4e-87	Catalyzes the interconversion of 2-phosphoglycerate and 3-phosphoglycerate (By similarity)	G	Carbohydrate transport and metabolism
mp2_00212	COG0756	1.5e-27	This enzyme is involved in nucleotide metabolism it produces dUMP, the immediate precursor of thymidine nucleotides and it decreases the intracellular concentration of dUTP so that uracil cannot be incorporated into DNA (By similarity)	F	Nucleotide transport and metabolism
mp2_00213	COG0120	7.8e-86	phosphoriboisomerase A	G	Carbohydrate transport and metabolism
mp2_00210	COG4956	1.9e-136	PilT protein domain protein	S	Function unknown
mp2_00211	COG1066	2.5e-205	May play a role in the repair of endogenous alkylation damage (By similarity)	O	Posttranslational modification, protein turnover, chaperones
mp2_01066	COG1368	9.1e-93	Sulfatase	M	Cell wall/membrane/envelope biogenesis
mp2_01064	ENOG410XPWS	6.6e-33	glycosyl transferase group 1	M	Cell wall/membrane/envelope biogenesis
mp2_01065	ENOG41121A6	7.4e-74	Uncharacterised protein family (UPF0104)	S	Function unknown
mp2_01062	COG1925	1.7e-29	phosphocarrier protein (HPr)	G	Carbohydrate transport and metabolism
mp2_01063	COG0438	1e-60	Glycosyl transferase (Group 1	M	Cell wall/membrane/envelope biogenesis
mp2_01060	ENOG410YIK0	1.2e-68	NA	S	Function unknown
mp2_01061	COG0542	2.9e-235	ATP-dependent CLP protease ATP-binding subunit	O	Posttranslational modification, protein turnover, chaperones
mp2_00345	COG1073	7.8e-36	Hydrolase	S	Function unknown
mp2_00508	COG1001	2e-190	adenine deaminase	F	Nucleotide transport and metabolism
mp2_00509	COG1215	2.1e-28	Glycosyl transferase, family 2	M	Cell wall/membrane/envelope biogenesis
mp2_00502	COG3527	1.5e-109	Alpha-acetolactate decarboxylase	Q	Secondary metabolites biosynthesis, transport and catabolism
mp2_00503	COG1249	3.5e-96	dihydrolipoyl dehydrogenase	C	Energy production and conversion
mp2_00500	ENOG41102VM	0.00027	NA	S	Function unknown
mp2_00506	ENOG411278V	3.7e-58	universal stress protein	S	Function unknown
mp2_00507	COG1914	2.8e-146	H( )-stimulated, divalent metal cation uptake system (By similarity)	P	Inorganic ion transport and metabolism
mp2_00504	COG1249	3.7e-85	dihydrolipoyl dehydrogenase	C	Energy production and conversion
mp2_00505	COG5523	8.5e-49	integral membrane protein	S	Function unknown
mp2_01118	COG1799	2.1e-35	Cell division protein that is part of the divisome complex and is recruited early to the Z-ring. Probably stimulates Z-ring formation, perhaps through the cross-linking of FtsZ protofilaments. Its function overlaps with FtsA (By similarity)	S	Function unknown
mp2_01119	COG2302	1.4e-73	s4 domain protein	J	Translation, ribosomal structure and biogenesis
mp2_01112	COG0472	3.6e-60	phospho-N-acetylmuramoyl-pentapeptide-transferase activity	M	Cell wall/membrane/envelope biogenesis
mp2_01113	COG0771	3.6e-139	Cell wall formation. Catalyzes the addition of glutamate to the nucleotide precursor UDP-N-acetylmuramoyl-L-alanine (UMA) (By similarity)	M	Cell wall/membrane/envelope biogenesis
mp2_01110	COG4839	1.7e-27	Essential cell division protein (By similarity)	D	Cell cycle control, cell division, chromosome partitioning
mp2_01111	COG0768	9.9e-147	penicillin-binding protein	M	Cell wall/membrane/envelope biogenesis
mp2_01116	COG0849	6.5e-133	This protein may be involved in anomalous filament growth. May be a component of the septum (By similarity)	D	Cell cycle control, cell division, chromosome partitioning
mp2_01117	COG0206	6.2e-171	Essential cell division protein that forms a contractile ring structure (Z ring) at the future cell division site. The regulation of the ring assembly controls the timing and the location of cell division. One of the functions of the FtsZ ring is to recruit other cell division proteins to the septum to produce a new cell wall between the dividing cells. Binds GTP and shows GTPase activity (By sim…	D	Cell cycle control, cell division, chromosome partitioning
mp2_01114	COG0707	7.6e-88	Cell wall formation. Catalyzes the transfer of a GlcNAc subunit on undecaprenyl-pyrophosphoryl-MurNAc-pentapeptide (lipid intermediate I) to form undecaprenyl-pyrophosphoryl-MurNAc- (pentapeptide)GlcNAc (lipid intermediate II) (By similarity)	M	Cell wall/membrane/envelope biogenesis
mp2_01115	COG1589	6.6e-37	Essential cell division protein. May link together the upstream cell division proteins, which are predominantly cytoplasmic, with the downstream cell division proteins, which are predominantly periplasmic. May control correct divisome assembly (By similarity)	M	Cell wall/membrane/envelope biogenesis
mp2_00435	ENOG4111ZHP	2.3e-25	transcriptional regulator, MerR	K	Transcription
mp2_00447	COG1479	1.3e-31	conserved protein	S	Function unknown
mp2_00446	ENOG4111TIV	3.3e-30	Protein of unknown function DUF262	S	Function unknown
mp2_00445	ENOG410XRY5	9.3e-12	RES domain protein	S	Function unknown
mp2_00444	ENOG4111X46	2.5e-34	transposase	L	Replication, recombination and repair
mp2_00443	ENOG410XPIG	9.4e-57	Integrase core domain	L	Replication, recombination and repair
mp2_00441	ENOG41122YS	6.4e-35	NA	S	Function unknown
mp2_00440	ENOG410ZMIV	8e-06	NA	U	Intracellular trafficking, secretion, and vesicular transport
mp2_00999	COG0097	3.3e-61	This protein binds to the 23S rRNA, and is important in its secondary structure. It is located near the subunit interface in the base of the L7 L12 stalk, and near the tRNA binding site of the peptidyltransferase center (By similarity)	J	Translation, ribosomal structure and biogenesis
mp2_00998	COG0096	1.5e-29	One of the primary rRNA binding proteins, it binds directly to 16S rRNA central domain where it helps coordinate assembly of the platform of the 30S subunit (By similarity)	J	Translation, ribosomal structure and biogenesis
mp2_00995	COG0198	4.2e-27	One of the proteins that surrounds the polypeptide exit tunnel on the outside of the subunit (By similarity)	J	Translation, ribosomal structure and biogenesis
mp2_00994	COG0093	7.2e-51	Binds to 23S rRNA. Forms part of two intersubunit bridges in the 70S ribosome (By similarity)	J	Translation, ribosomal structure and biogenesis
mp2_00997	COG0199	6.9e-17	Binds 16S rRNA, required for the assembly of 30S particles and may also be responsible for determining the conformation of the 16S rRNA at the A site (By similarity)	J	Translation, ribosomal structure and biogenesis
mp2_00996	COG0094	2.8e-54	This is 1 of the proteins that binds and probably mediates the attachment of the 5S RNA into the large ribosomal subunit, where it forms part of the central protuberance. In the 70S ribosome it contacts protein S13 of the 30S subunit (bridge B1b), connecting the 2 subunits	J	Translation, ribosomal structure and biogenesis
mp2_00991	COG0197	5.9e-48	Binds 23S rRNA and is also seen to make contacts with the A and possibly P site tRNAs (By similarity)	J	Translation, ribosomal structure and biogenesis
mp2_00990	COG0092	1.6e-86	Binds the lower part of the 30S subunit head. Binds mRNA in the 70S ribosome, positioning it for translation (By similarity)	J	Translation, ribosomal structure and biogenesis
mp2_00993	COG0186	3.7e-25	One of the primary rRNA binding proteins, it binds specifically to the 5'-end of 16S ribosomal	J	Translation, ribosomal structure and biogenesis
mp2_00992	ENOG410ZZF9	4.5e-22	50S ribosomal protein L29	J	Translation, ribosomal structure and biogenesis
mp2_00043	COG3299	1.1e-62	baseplate J family protein	S	Function unknown
mp2_00042	ENOG4111YKG	1.6e-21	NA	S	Function unknown
mp2_00041	ENOG41127FF	0.0001	NA	S	Function unknown
mp2_00040	ENOG410XRFG	6.4e-08	Transmembrane protein 57	S	Function unknown
mp2_00047	ENOG410Y2IT	3.3e-33	NA	S	Function unknown
mp2_00046	ENOG4111WKE	2.8e-54	NA	S	Function unknown
mp2_00045	ENOG410YTC1	3.3e-11	NA	S	Function unknown
mp2_00044	ENOG410Z1GD	1.8e-09	NA	S	Function unknown
mp2_00049	COG5283	3.1e-59	Phage Tail Tape Measure Protein	S	Function unknown
mp2_00048	ENOG410YPBZ	5.4e-32	LysM domain	S	Function unknown
mp2_01273	COG1418	9.9e-24	Endoribonuclease that initiates mRNA decay (By similarity)	S	Function unknown
mp2_01272	COG0566	3.2e-38	Methyltransferase	J	Translation, ribosomal structure and biogenesis
mp2_01271	COG1254	8.2e-27	Acylphosphatase (EC 3.6.1.7)	C	Energy production and conversion
mp2_01270	COG0706	5.5e-65	Required for the insertion and or proper folding and or complex formation of integral membrane proteins into the membrane. Involved in integration of membrane proteins that insert both dependently and independently of the Sec translocase complex, as well as at least some lipoproteins	U	Intracellular trafficking, secretion, and vesicular transport
mp2_01277	COG0073	1.4e-261	Is required not only for elongation of protein synthesis but also for the initiation of all mRNA translation through initiator tRNA(fMet) aminoacylation (By similarity)	J	Translation, ribosomal structure and biogenesis
mp2_01276	COG0016	6.6e-95	phenylalanyL-tRNA synthetase, alpha subunit	J	Translation, ribosomal structure and biogenesis
mp2_01274	COG1733	1.4e-28	transcription, DNA-dependent	K	Transcription
mp2_01279	COG0572	3.6e-80	uridine kinase	F	Nucleotide transport and metabolism
mp2_01278	COG1559	4.4e-72	Aminodeoxychorismate lyase	S	Function unknown
mp2_01471	COG0282	1.5e-153	acetate kinase activity	C	Energy production and conversion
mp2_01470	COG1113	1.7e-164	amino acid	E	Amino acid transport and metabolism
mp2_01473	ENOG410Y6T2	3.1e-20	NA	S	Function unknown
mp2_01472	COG0827	2.3e-31	DNA Methylase	L	Replication, recombination and repair
mp2_01475	ENOG410Z167	4.5e-31	NA	S	Function unknown
mp2_01474	ENOG410Y7K8	1.6e-05	Biogenesis protein	U	Intracellular trafficking, secretion, and vesicular transport
mp2_01477	COG1459	3e-60	Type ii secretion system	U	Intracellular trafficking, secretion, and vesicular transport
mp2_01476	ENOG41102VM	1.8e-39	NA	S	Function unknown
mp2_01479	COG0217	5.5e-99	transcriptional regulatory protein	K	Transcription
mp2_01478	COG1459	1.3e-76	Type ii secretion system	U	Intracellular trafficking, secretion, and vesicular transport
mp2_00195	COG0209	1.1e-132	Provides the precursors necessary for DNA synthesis. Catalyzes the biosynthesis of deoxyribonucleotides from the corresponding ribonucleotides (By similarity)	F	Nucleotide transport and metabolism
mp2_00194	ENOG410XVSX	9e-15	Glutaredoxin	O	Posttranslational modification, protein turnover, chaperones
mp2_00197	COG0392	1.1e-171	Membrane	S	Function unknown
mp2_00196	COG0208	3.1e-61	Provides the precursors necessary for DNA synthesis. Catalyzes the biosynthesis of deoxyribonucleotides from the corresponding ribonucleotides (By similarity)	F	Nucleotide transport and metabolism
mp2_00191	COG2812	6.8e-175	dna polymerase iii subunits gamma and tau	L	Replication, recombination and repair
mp2_00190	COG0718	1.1e-34	Binds to DNA and alters its conformation. May be involved in regulation of gene expression, nucleoid organization and DNA protection (By similarity)	S	Function unknown
mp2_00193	COG2813	1.1e-57	Specifically methylates the guanine in position 1207 of 16S rRNA in the 30S particle (By similarity)	J	Translation, ribosomal structure and biogenesis
mp2_00192	COG0590	2.4e-51	deaminase	FJ	Nucleotide transport and metabolism,Translation, ribosomal structure and biogenesis
mp2_01186	COG0575	1.5e-65	phosphatidate Cytidylyltransferase	I	Lipid transport and metabolism
mp2_00199	COG0244	1.4e-39	50s ribosomal protein L10	J	Translation, ribosomal structure and biogenesis
mp2_00198	COG0222	3e-30	Seems to be the binding site for several of the factors involved in protein synthesis and appears to be essential for accurate translation (By similarity)	J	Translation, ribosomal structure and biogenesis
mp2_00357	COG0044	1.9e-126	Dihydroorotase	F	Nucleotide transport and metabolism
mp2_01188	COG0442	1.9e-97	Catalyzes the attachment of proline to tRNA(Pro) in a two-step reaction proline is first activated by ATP to form Pro- AMP and then transferred to the acceptor end of tRNA(Pro). As ProRS can inadvertently accommodate and process non-cognate amino acids such as alanine and cysteine, to avoid such errors it has two additional distinct editing activities against alanine. One activity is designated a…	J	Translation, ribosomal structure and biogenesis
mp2_00229	COG0345	2.3e-71	pyrroline-5-carboxylate reductase activity	E	Amino acid transport and metabolism
mp2_00228	COG2188	4.4e-55	GntR family transcriptional regulator	K	Transcription
mp2_00223	COG2183	1.3e-198	domain protein	K	Transcription
mp2_00222	COG3091	1.1e-46	SprT-like	S	Function unknown
mp2_00221	COG0083	2.4e-49	Catalyzes the ATP-dependent phosphorylation of L- homoserine to L-homoserine phosphate (By similarity)	E	Amino acid transport and metabolism
mp2_00227	COG1922	2.5e-83	Glycosyl transferase, wecb taga cpsf family	M	Cell wall/membrane/envelope biogenesis
mp2_00226	COG1488	3.9e-158	Nicotinate phosphoribosyltransferase	H	Coenzyme transport and metabolism
mp2_00225	COG0171	6.9e-62	nh(3)-dependent nad( ) synthetase	H	Coenzyme transport and metabolism
mp2_00224	ENOG4112A7E	8.1e-37	NA	S	Function unknown
mp2_01059	COG4108	2.1e-237	Increases the formation of ribosomal termination complexes and stimulates activities of RF-1 and RF-2. It binds guanine nucleotides and has strong preference for UGA stop codons. It may interact directly with the ribosome. The stimulation of RF- 1 and RF-2 is significantly reduced by GTP and GDP, but not by GMP (By similarity)	J	Translation, ribosomal structure and biogenesis
mp2_01058	COG0615	4.2e-28	cytidylyltransferase	IM	Lipid transport and metabolism,Cell wall/membrane/envelope biogenesis
mp2_01053	COG0381	5.5e-138	UDP-N-acetylglucosamine 2-epimerase	M	Cell wall/membrane/envelope biogenesis
mp2_01052	ENOG410XNQN	9.5e-80	Glycosyl transferase family 2	M	Cell wall/membrane/envelope biogenesis
mp2_01051	COG2246	1.6e-30	Gtra family	S	Function unknown
mp2_01050	COG2610	1.3e-107	Gluconate	EG	Amino acid transport and metabolism,Carbohydrate transport and metabolism
mp2_01057	COG0628	1.6e-74	Membrane	S	Function unknown
mp2_01056	COG2137	3.3e-40	Modulates RecA activity (By similarity)	S	Function unknown
mp2_01055	COG0716	6.6e-15	Low-potential electron donor to a number of redox enzymes (By similarity)	C	Energy production and conversion
mp2_01054	COG1295	8.7e-56	ribonuclease BN	S	Function unknown
mp2_01299	COG0261	3.6e-51	This protein binds to 23S rRNA in the presence of protein L20 (By similarity)	J	Translation, ribosomal structure and biogenesis
mp2_01291	ENOG4111X46	2.5e-34	transposase	L	Replication, recombination and repair
mp2_01290	ENOG410ZM6S	2.2e-15	Rhodanese-like domain	S	Function unknown
mp2_01293	ENOG410Y0YB	6.1e-25	Protein of unknown function (DUF3042)	S	Function unknown
mp2_01292	ENOG410XPIG	1.9e-57	Integrase core domain	L	Replication, recombination and repair
mp2_01295	COG0789	7.5e-25	Transcriptional regulator	K	Transcription
mp2_01294	COG0324	2.8e-107	Catalyzes the transfer of a dimethylallyl group onto the adenine at position 37 in tRNAs that read codons beginning with uridine, leading to the formation of N6-(dimethylallyl)adenosine (i(6)A) (By similarity)	J	Translation, ribosomal structure and biogenesis
mp2_01297	ENOG41129UJ	3.3e-40	NA	S	Function unknown
mp2_01296	COG0174	1.4e-143	glutamine synthetase	E	Amino acid transport and metabolism
mp2_00539	ENOG41123V8	1.8e-25	Transcriptional regulator, MarR Family	K	Transcription
mp2_00538	ENOG4111UAW	4.1e-51	acetyltransferase	S	Function unknown
mp2_00536	COG1027	7.4e-174	Aspartate ammonia-lyase	E	Amino acid transport and metabolism
mp2_00535	COG0719	1.4e-166	Fe-S assembly protein	O	Posttranslational modification, protein turnover, chaperones
mp2_00534	ENOG410ZDI1	6.9e-12	NifU-like N terminal domain	S	Function unknown
mp2_00533	COG2166	5.5e-107	Fe-S metabolism associated	S	Function unknown
mp2_00532	COG0719	3.6e-61	Fe-S assembly protein	O	Posttranslational modification, protein turnover, chaperones
mp2_00531	COG0396	2.3e-120	feS assembly ATPase SufC	O	Posttranslational modification, protein turnover, chaperones
mp2_00530	COG0602	2.1e-30	Catalyzes the conversion of 6-carboxy-5,6,7,8- tetrahydropterin (CPH4) to 7-carboxy-7-deazaguanine (CDG) (By similarity)	O	Posttranslational modification, protein turnover, chaperones
mp2_01129	COG0406	9.3e-36	Phosphoglycerate mutase	G	Carbohydrate transport and metabolism
mp2_01128	COG0482	4.6e-165	Catalyzes the 2-thiolation of uridine at the wobble position (U34) of tRNA, leading to the formation of s(2)U34 (By similarity)	J	Translation, ribosomal structure and biogenesis
mp2_01127	ENOG41122BZ	3.2e-43	Putative amino acid metabolism	S	Function unknown
mp2_01126	COG1104	1.6e-140	cysteine desulfurase	E	Amino acid transport and metabolism
mp2_01125	COG0775	2.4e-33	Catalyzes the irreversible cleavage of the glycosidic bond in both 5'-methylthioadenosine (MTA) and S- adenosylhomocysteine (SAH AdoHcy) to adenine and the corresponding thioribose, 5'-methylthioribose and S-ribosylhomocysteine, respectively (By similarity)	F	Nucleotide transport and metabolism
mp2_01124	ENOG410XU52	0.00049	domain protein, FtsQ-type	S	Function unknown
mp2_01123	ENOG4111J66	7.9e-45	NUDiX hydrolase	S	Function unknown
mp2_01122	ENOG410ZXBR	1.9e-15	'Cold-shock' DNA-binding domain	S	Function unknown
mp2_01121	COG0060	0	amino acids such as valine, to avoid such errors it has two additional distinct tRNA(Ile)-dependent editing activities. One activity is designated as 'pretransfer' editing and involves the hydrolysis of activated Val-AMP. The other activity is designated 'posttransfer' editing and involves deacylation of mischarged Val-tRNA(Ile) (By similarity)	J	Translation, ribosomal structure and biogenesis
mp2_01120	COG3599	1.1e-42	Divisome component that associates with the complex late in its assembly, after the Z-ring is formed, and is dependent on DivIC and PBP2B for its recruitment to the divisome. Together with EzrA, is a key component of the system that regulates PBP1 localization during cell cycle progression. Its main role could be the removal of PBP1 from the cell pole after pole maturation is completed. Also cont…	D	Cell cycle control, cell division, chromosome partitioning
mp2_00458	COG3757	9.9e-28	hydrolase, family 25	M	Cell wall/membrane/envelope biogenesis
mp2_00459	COG0642	6.6e-77	Histidine kinase	T	Signal transduction mechanisms
mp2_00450	ENOG41122AV	4.1e-39	NA	S	Function unknown
mp2_00451	COG0287	6.6e-57	prephenate dehydrogenase	E	Amino acid transport and metabolism
mp2_00452	ENOG410XVF5	3.1e-32	Membrane	S	Function unknown
mp2_00453	ENOG410ZWHQ	4.7e-24	CAAX amino terminal protease family	S	Function unknown
mp2_00454	ENOG4110NJ5	0.00033	cadherin-related family member 4	U	Intracellular trafficking, secretion, and vesicular transport
mp2_00455	ENOG410ZZ55	0.00023	NA	S	Function unknown
mp2_00456	ENOG410XUF6	9.6e-28	Heat shock protein	O	Posttranslational modification, protein turnover, chaperones
mp2_00457	ENOG410XUF6	6.6e-27	Heat shock protein	O	Posttranslational modification, protein turnover, chaperones
mp2_00988	COG0185	2.4e-34	Protein S19 forms a complex with S13 that binds strongly to the 16S ribosomal RNA (By similarity)	J	Translation, ribosomal structure and biogenesis
mp2_00989	COG0091	1.8e-40	The globular domain of the protein is located near the polypeptide exit tunnel on the outside of the subunit, while an extended beta-hairpin is found that lines the wall of the exit tunnel in the center of the 70S ribosome (By similarity)	J	Translation, ribosomal structure and biogenesis
mp2_00986	COG0089	1.1e-26	One of the early assembly proteins it binds 23S rRNA. One of the proteins that surrounds the polypeptide exit tunnel on the outside of the ribosome. Forms the main docking site for trigger factor binding to the ribosome (By similarity)	J	Translation, ribosomal structure and biogenesis
mp2_00987	COG0090	1e-108	One of the primary rRNA binding proteins. Required for association of the 30S and 50S subunits to form the 70S ribosome, for tRNA binding and peptide bond formation. It has been suggested to have peptidyltransferase activity	J	Translation, ribosomal structure and biogenesis
mp2_00984	COG0087	1.1e-70	One of the primary rRNA binding proteins, it binds directly near the 3'-end of the 23S rRNA, where it nucleates assembly of the 50S subunit (By similarity)	J	Translation, ribosomal structure and biogenesis
mp2_00985	COG0088	1.1e-68	One of the primary rRNA binding proteins, this protein initially binds near the 5'-end of the 23S rRNA. It is important during the early stages of 50S assembly. It makes multiple contacts with different domains of the 23S rRNA in the assembled 50S subunit and ribosome (By similarity)	J	Translation, ribosomal structure and biogenesis
mp2_00982	COG0480	5.7e-158	Catalyzes the GTP-dependent ribosomal translocation step during translation elongation. During this step, the ribosome changes from the pre-translocational (PRE) to the post- translocational (POST) state as the newly formed A-site-bound peptidyl-tRNA and P-site-bound deacylated tRNA move to the P and E sites, respectively. Catalyzes the coordinated movement of the two tRNA molecules, the mRNA and…	J	Translation, ribosomal structure and biogenesis
mp2_00983	COG0051	8.2e-40	tRNA binding	J	Translation, ribosomal structure and biogenesis
mp2_00980	COG0048	3.2e-40	Interacts with and stabilizes bases of the 16S rRNA that are involved in tRNA selection in the A site and with the mRNA backbone. Located at the interface of the 30S and 50S subunits, it traverses the body of the 30S subunit contacting proteins on the other side and probably holding the rRNA structure together. The combined cluster of proteins S8, S12 and S17 appears to hold together the shoulder…	J	Translation, ribosomal structure and biogenesis
mp2_00981	COG0049	4e-59	One of the primary rRNA binding proteins, it binds directly to 16S rRNA where it nucleates assembly of the head domain of the 30S subunit. Is located at the subunit interface close to the decoding center, probably blocks exit of the E-site tRNA (By similarity)	J	Translation, ribosomal structure and biogenesis
mp2_01383	COG1227	3.8e-60	Manganese-dependent inorganic pyrophosphatase	C	Energy production and conversion
mp2_01382	ENOG4111MB6	1.1e-80	Nicotinamide Mononucleotide Transporter	S	Function unknown
mp2_00153	COG0126	3.5e-130	phosphoglycerate kinase	G	Carbohydrate transport and metabolism
mp2_01380	COG0225	1.2e-67	Has an important function as a repair enzyme for proteins that have been inactivated by oxidation. Catalyzes the reversible oxidation-reduction of methionine sulfoxide in proteins to methionine (By similarity)	O	Posttranslational modification, protein turnover, chaperones
mp2_00154	COG0057	9.5e-107	glyceraldehyde3phosphate dehydrogenase	G	Carbohydrate transport and metabolism
mp2_00157	COG1481	3.3e-117	May be required for sporulation (By similarity)	K	Transcription
mp2_01384	ENOG410XR9S	9.8e-82	Transcriptional regulator	K	Transcription
mp2_00054	ENOG410YYQF	1.6e-08	NA	S	Function unknown
mp2_00056	ENOG41120SA	2.5e-40	NA	S	Function unknown
mp2_00057	ENOG410YTB8	0.00029	NA	S	Function unknown
mp2_00051	ENOG411203T	0.00012	NA	S	Function unknown
mp2_00052	ENOG410XUEQ	2.1e-13	NA	S	Function unknown
mp2_00053	ENOG4111UPU	1.2e-24	Protein of unknown function (DUF3383)	S	Function unknown
mp2_00058	ENOG410YYQ7	1.4e-08	NA	S	Function unknown
mp2_00059	ENOG4111WXB	6.7e-40	capsid protein	S	Function unknown
mp2_01264	COG1161	1.6e-51	Required for a late step of 50S ribosomal subunit assembly. Has GTPase activity (By similarity)	S	Function unknown
mp2_01265	COG0164	1.8e-79	Endonuclease that specifically degrades the RNA of RNA- DNA hybrids (By similarity)	L	Replication, recombination and repair
mp2_01266	COG0758	2e-82	DNA protecting protein DprA	L	Replication, recombination and repair
mp2_01267	COG1754	5.8e-251	Releases the supercoiling and torsional tension of DNA, which is introduced during the DNA replication and transcription, by transiently cleaving and rejoining one strand of the DNA duplex. Introduces a single-strand break via transesterification at a target site in duplex DNA. The scissile phosphodiester is attacked by the catalytic tyrosine of the enzyme, resulting in the formation of a DNA-(5'…	L	Replication, recombination and repair
mp2_01260	COG0262	2.9e-38	dihydrofolate reductase activity	H	Coenzyme transport and metabolism
mp2_01261	COG2755	5.4e-26	lipolytic protein G-D-S-L family	E	Amino acid transport and metabolism
mp2_01262	COG4698	5.5e-52	Uncharacterized protein conserved in bacteria (DUF2140)	S	Function unknown
mp2_01263	COG4479	2.1e-34	UPF0346 protein	S	Function unknown
mp2_01268	COG4973	5.8e-97	Site-specific tyrosine recombinase, which acts by catalyzing the cutting and rejoining of the recombining DNA molecules. The XerC-XerD complex is essential to convert dimers of the bacterial chromosome into monomers to permit their segregation at cell division. It also contributes to the segregational stability of plasmids (By similarity)	L	Replication, recombination and repair
mp2_01269	COG2017	1.5e-45	converts alpha-aldose to the beta-anomer. It is active on D-glucose, L-arabinose, D-xylose, D-galactose, maltose and lactose (By similarity)	G	Carbohydrate transport and metabolism
mp2_01462	COG0586	6.3e-53	SNARE associated Golgi	S	Function unknown
mp2_01463	ENOG4111X46	2.6e-35	transposase	L	Replication, recombination and repair
mp2_01461	ENOG410XQB4	7.7e-64	peptidylprolyl isomerase domain and WD	O	Posttranslational modification, protein turnover, chaperones
mp2_01466	COG0647	5.5e-59	Hydrolase	G	Carbohydrate transport and metabolism
mp2_01467	COG4470	1.3e-43	Transcriptional regulator	S	Function unknown
mp2_01464	ENOG410XPIG	9.4e-57	Integrase core domain	L	Replication, recombination and repair
mp2_01465	COG4478	2.6e-44	integral membrane protein	S	Function unknown
mp2_01468	COG0737	3.1e-63	5-Nucleotidase	F	Nucleotide transport and metabolism
mp2_01469	COG4186	4.3e-56	Phosphoesterase or phosphohydrolase	S	Function unknown
mp2_00186	COG3870	2.9e-41	protein from nitrogen regulatory protein P-II	S	Function unknown
mp2_00187	COG0125	2e-61	Phosphorylation of dTMP to form dTDP in both de novo and salvage pathways of dTTP synthesis (By similarity)	F	Nucleotide transport and metabolism
mp2_00184	COG4467	2.6e-35	Involved in initiation control of chromosome replication (By similarity)	S	Function unknown
mp2_00185	COG2812	6.4e-49	dna polymerase iii subunits gamma and tau	L	Replication, recombination and repair
mp2_00182	COG3884	5.4e-65	acyl-ACP thioesterase	I	Lipid transport and metabolism
mp2_00183	COG0313	5.8e-115	Catalyzes the 2'-O-methylation of the ribose of cytidine 1402 (C1402) in 16S rRNA (By similarity)	S	Function unknown
mp2_00180	COG1214	8.2e-33	Peptidase M22 Glycoprotease	O	Posttranslational modification, protein turnover, chaperones
mp2_00181	COG1214	1.2e-53	Peptidase M22 Glycoprotease	O	Posttranslational modification, protein turnover, chaperones
mp2_00188	ENOG410XWMW	7e-27	Protein of unknown function (DUF2508)	S	Function unknown
mp2_00189	COG0353	1.1e-94	May play a role in DNA repair. It seems to be involved in an RecBC-independent recombinational process of DNA repair. It may act with RecF and RecO (By similarity)	L	Replication, recombination and repair
mp2_00232	COG3104	1.3e-70	transporter	E	Amino acid transport and metabolism
mp2_01048	ENOG4111G6T	4.8e-49	Trans_reg_C	T	Signal transduction mechanisms
mp2_01049	COG4975	2.2e-99	uptake protein	G	Carbohydrate transport and metabolism
mp2_01044	COG0581	4.7e-87	phosphate abc transporter	P	Inorganic ion transport and metabolism
mp2_01045	COG1117	3.4e-124	Part of the ABC transporter complex PstSACB involved in phosphate import. Responsible for energy coupling to the transport system (By similarity)	P	Inorganic ion transport and metabolism
mp2_01046	COG1117	5.6e-124	Part of the ABC transporter complex PstSACB involved in phosphate import. Responsible for energy coupling to the transport system (By similarity)	P	Inorganic ion transport and metabolism
mp2_01047	COG0704	5.9e-41	Plays a role in the regulation of phosphate uptake	P	Inorganic ion transport and metabolism
mp2_01041	COG0226	9.7e-57	phosphate abc transporter	P	Inorganic ion transport and metabolism
mp2_01042	COG0226	3.2e-56	phosphate abc transporter	P	Inorganic ion transport and metabolism
mp2_01043	COG0573	2.8e-91	phosphate abc transporter	P	Inorganic ion transport and metabolism
mp2_01288	COG4483	4.9e-34	Bacterial protein of unknown function (DUF910)	S	Function unknown
mp2_01289	COG1940	6.7e-74	ROK family	G	Carbohydrate transport and metabolism
mp2_01282	ENOG410XPIG	4.1e-57	Integrase core domain	L	Replication, recombination and repair
mp2_01283	COG4485	1.7e-206	Membrane	S	Function unknown
mp2_01280	COG0782	9.4e-59	Necessary for efficient RNA polymerase transcription elongation past template-encoded arresting sites. The arresting sites in DNA have the property of trapping a certain fraction of elongating RNA polymerases that pass through, resulting in locked ternary complexes. Cleavage of the nascent transcript by cleavage factors such as GreA or GreB allows the resumption of elongation from the new 3'termi…	K	Transcription
mp2_01281	ENOG4111X46	1.7e-35	transposase	L	Replication, recombination and repair
mp2_01286	COG0212	1.6e-38	5-formyltetrahydrofolate cyclo-ligase	H	Coenzyme transport and metabolism
mp2_01287	COG0705	4e-45	rhomboid family	S	Function unknown
mp2_01284	COG0768	1.9e-102	penicillin-binding protein	M	Cell wall/membrane/envelope biogenesis
mp2_01285	COG0267	3.1e-21	50S ribosomal protein L33	J	Translation, ribosomal structure and biogenesis
mp2_00520	ENOG410ZVEA	1.7e-130	type iii restriction	V	Defense mechanisms
mp2_00521	COG2189	1.2e-72	DNA methylase	L	Replication, recombination and repair
mp2_00522	ENOG410XUJM	4.4e-24	CAAX amino terminal protease family	S	Function unknown
mp2_00523	COG0475	7.7e-75	Sodium hydrogen exchanger	P	Inorganic ion transport and metabolism
mp2_00524	ENOG4111X46	1.7e-25	transposase	L	Replication, recombination and repair
mp2_00525	ENOG410XPIG	4.3e-28	Integrase core domain	L	Replication, recombination and repair
mp2_00526	ENOG41129NB	5.3e-07	BTP	K	Transcription
mp2_00527	COG0475	8.1e-71	Sodium hydrogen exchanger	P	Inorganic ion transport and metabolism
mp2_00528	COG3619	6.4e-59	membrAne	S	Function unknown
mp2_00529	COG1328	1.3e-152	Anaerobic ribonucleoside-triphosphate reductase	F	Nucleotide transport and metabolism
mp2_01130	ENOG4111U03	8.5e-78	TPR repeatcontaining protein	S	Function unknown
mp2_01131	COG0507	6.6e-301	exodeoxyribonuclease v alpha	L	Replication, recombination and repair
mp2_01132	COG0462	4.6e-115	Phosphoribosyl pyrophosphate synthase	F	Nucleotide transport and metabolism
mp2_01133	COG0667	1e-62	Aldo keto reductase	C	Energy production and conversion
mp2_01134	ENOG410XQEW	4.4e-140	Amino acid permease	P	Inorganic ion transport and metabolism
mp2_01135	COG1597	6.8e-23	diacylglycerol kinase	I	Lipid transport and metabolism
mp2_01136	COG0595	1.1e-217	Metallo-Beta-Lactamase	S	Function unknown
mp2_01137	COG5503	2.3e-33	UPF0356 protein	S	Function unknown
mp2_01138	ENOG410XX5V	1.5e-26	NA	S	Function unknown
mp2_01139	COG0242	2.2e-43	Removes the formyl group from the N-terminal Met of newly synthesized proteins. Requires at least a dipeptide for an efficient rate of reaction. N-terminal L-methionine is a prerequisite for activity but the enzyme has broad specificity at other positions (By similarity)	J	Translation, ribosomal structure and biogenesis
mp2_00429	COG0166	7.5e-85	glucose-6-phosphate isomerase activity	G	Carbohydrate transport and metabolism
mp2_00428	COG1940	1.7e-38	ROK family	G	Carbohydrate transport and metabolism
mp2_00425	ENOG4111UAD	1.7e-26	Protein of unknown function (DUF1700)	S	Function unknown
mp2_00424	ENOG41123YP	1.2e-26	NA	S	Function unknown
mp2_00427	COG1621	1.9e-86	Hydrolase	G	Carbohydrate transport and metabolism
mp2_00426	COG1695	3.2e-25	Transcriptional regulator	K	Transcription
mp2_00421	ENOG410Z3HS	3.3e-12	NA	S	Function unknown
mp2_00423	ENOG4110GPT	0.00044	NA	S	Function unknown
mp2_00422	ENOG410XXF0	8.4e-07	WSC domain	S	Function unknown
mp2_00731	ENOG41100ID	2.5e-79	Sulfite exporter TauE/SafE	S	Function unknown
mp2_00730	ENOG4111PEU	9.7e-55	(Lipo)protein	S	Function unknown
mp2_00733	ENOG4111P8X	3.6e-27	Methyltransferase	S	Function unknown
mp2_00732	ENOG4111WKC	8.9e-23	Transcriptional regulator	K	Transcription
mp2_00735	COG4166	5.1e-94	peptide transport	E	Amino acid transport and metabolism
mp2_00734	COG2071	2.3e-73	Glutamine amidotransferase	S	Function unknown
mp2_00737	ENOG4111KZE	2.5e-87	NA	S	Function unknown
mp2_00736	COG4166	2.7e-104	peptide transport	E	Amino acid transport and metabolism
mp2_00739	ENOG410XQ7R	1.4e-06	ABC-2 type transporter	V	Defense mechanisms
mp2_00738	COG1131	2.7e-80	(ABC) transporter	V	Defense mechanisms
mp2_00887	COG0833	1.8e-121	permease	E	Amino acid transport and metabolism
mp2_00886	COG2040	6.9e-82	Homocysteine s-methyltransferase	E	Amino acid transport and metabolism
mp2_00885	ENOG410XX2Y	1.6e-25	NA	S	Function unknown
mp2_00884	COG0735	2.1e-33	Ferric uptake regulator, Fur family	K	Transcription
mp2_00883	COG0136	7.2e-131	Catalyzes the NADPH-dependent formation of L-aspartate- semialdehyde (L-ASA) by the reductive dephosphorylation of L- aspartyl-4-phosphate (By similarity)	E	Amino acid transport and metabolism
mp2_00882	COG0436	1.4e-78	aminotransferase	E	Amino acid transport and metabolism
mp2_00881	COG0289	1.1e-65	Catalyzes the conversion of 4-hydroxy- tetrahydrodipicolinate (HTPA) to tetrahydrodipicolinate (By similarity)	E	Amino acid transport and metabolism
mp2_00880	COG0329	1e-77	Catalyzes the condensation of (S)-aspartate-beta- semialdehyde (S)-ASA and pyruvate to 4-hydroxy- tetrahydrodipicolinate (HTPA) (By similarity)	E	Amino acid transport and metabolism
mp2_00889	COG1199	5.5e-102	helicase	L	Replication, recombination and repair
mp2_00888	COG2706	1.6e-105	6-phosphogluconolactonase	G	Carbohydrate transport and metabolism
mp2_00959	COG4272	2.8e-45	Membrane	S	Function unknown
mp2_00958	COG3610	6.1e-23	Membrane	S	Function unknown
mp2_00951	COG4420	8.1e-58	integral membrane protein	S	Function unknown
mp2_00950	COG0564	1.6e-61	pseudouridine synthase activity	J	Translation, ribosomal structure and biogenesis
mp2_00953	ENOG4111PF0	2.7e-54	acetyltransferase	S	Function unknown
mp2_00952	ENOG410YNHB	4.3e-68	NA	S	Function unknown
mp2_00955	ENOG410YU2I	1.4e-20	NA	S	Function unknown
mp2_00954	COG1230	5.1e-85	cation diffusion facilitator family transporter	P	Inorganic ion transport and metabolism
mp2_00957	COG2966	2.2e-51	Membrane	S	Function unknown
mp2_00956	COG1321	2.2e-56	cellular manganese ion homeostasis	K	Transcription
mp2_00088	ENOG41110RW	4.5e-05	NA	S	Function unknown
mp2_00087	ENOG41128KA	1.5e-05	NA	S	Function unknown
mp2_00086	ENOG410XY5V	1.1e-10	NA	S	Function unknown
mp2_00083	ENOG4111WP6	3.8e-36	Protein of unknown function (DUF1351)	S	Function unknown
mp2_00082	ENOG4111KYA	6.3e-43	Erf family	S	Function unknown
mp2_00081	COG0629	2.3e-40	single-stranded DNA-binding protein	L	Replication, recombination and repair
mp2_00080	ENOG4111R20	1.4e-53	NA	S	Function unknown
mp2_00555	COG1195	2.3e-129	it is required for DNA replication and normal SOS inducibility. RecF binds preferentially to single-stranded, linear DNA. It also seems to bind ATP (By similarity)	L	Replication, recombination and repair
mp2_00554	COG0187	1e-291	DNA gyrase negatively supercoils closed circular double- stranded DNA in an ATP-dependent manner and also catalyzes the interconversion of other topological isomers of double-stranded DNA rings, including catenanes and knotted rings (By similarity)	L	Replication, recombination and repair
mp2_00557	COG0006	4.1e-73	peptidase M24	E	Amino acid transport and metabolism
mp2_00556	COG2501	7.5e-29	s4 domain protein	S	Function unknown
mp2_00551	ENOG410YGGR	1.7e-73	NA	S	Function unknown
mp2_00550	COG0360	8.4e-25	Binds together with S18 to 16S ribosomal RNA (By similarity)	J	Translation, ribosomal structure and biogenesis
mp2_00553	COG0188	0	DNA gyrase negatively supercoils closed circular double- stranded DNA in an ATP-dependent manner and also catalyzes the interconversion of other topological isomers of double-stranded DNA rings, including catenanes and knotted rings (By similarity)	L	Replication, recombination and repair
mp2_00552	ENOG4111GSZ	3.2e-122	Major Facilitator Superfamily	G	Carbohydrate transport and metabolism
mp2_00559	COG0593	2.5e-126	it binds specifically double-stranded DNA at a 9 bp consensus (dnaA box) 5'-TTATC CA A CA A-3'. DnaA binds to ATP and to acidic phospholipids (By similarity)	L	Replication, recombination and repair
mp2_00558	COG0592	3.2e-62	DNA polymerase processivity factor activity	L	Replication, recombination and repair
mp2_01145	COG4471	2.4e-25	UPF0298 protein	S	Function unknown
mp2_01144	COG0772	1.5e-110	Cell Division Protein	D	Cell cycle control, cell division, chromosome partitioning
mp2_01147	COG0669	1.8e-65	Reversibly transfers an adenylyl group from ATP to 4'- phosphopantetheine, yielding dephospho-CoA (dPCoA) and pyrophosphate (By similarity)	H	Coenzyme transport and metabolism
mp2_01146	COG0742	1.7e-56	Methyltransferase	L	Replication, recombination and repair
mp2_01141	COG4476	2e-30	UPF0223 protein	S	Function unknown
mp2_01140	ENOG41129R0	0.00031	NA	S	Function unknown
mp2_01143	COG1217	2.7e-286	gtp-binding protein typa	T	Signal transduction mechanisms
mp2_01142	COG0483	1.9e-48	inositol monophosphatase	G	Carbohydrate transport and metabolism
mp2_01149	COG1555	1.8e-31	Competence protein	L	Replication, recombination and repair
mp2_01161	ENOG4111F0I	8.5e-15	NA	S	Function unknown
mp2_01160	COG0218	1.9e-57	Necessary for normal cell division and for the maintenance of normal septation (By similarity)	S	Function unknown
mp2_01167	COG0503	1.1e-71	Catalyzes a salvage reaction resulting in the formation of AMP, that is energically less costly than de novo synthesis (By similarity)	F	Nucleotide transport and metabolism
mp2_00374	COG1957	2.3e-71	nucleoside hydrolase	F	Nucleotide transport and metabolism
mp2_01165	COG1234	4e-70	Zinc phosphodiesterase, which displays some tRNA 3'- processing endonuclease activity. Probably involved in tRNA maturation, by removing a 3'-trailer from precursor tRNA (By similarity)	S	Function unknown
mp2_00438	ENOG4111KE0	3.2e-25	N-acetyltransferase	S	Function unknown
mp2_00439	ENOG41110QQ	0.0003	NA	S	Function unknown
mp2_00436	ENOG410ZRY4	0.0005	cytochrome C, class I	C	Energy production and conversion
mp2_00437	ENOG4111KE0	3.6e-27	N-acetyltransferase	S	Function unknown
mp2_00434	ENOG410XQZX	3.7e-110	drug resistance transporter emrb qaca subfamily	P	Inorganic ion transport and metabolism
mp2_00376	COG1393	2e-30	arsenate reductase (glutaredoxin) activity	P	Inorganic ion transport and metabolism
mp2_00432	ENOG410YW8A	0.00097	CAAX protease self-immunity	S	Function unknown
mp2_00433	ENOG4111FPX	0	surface protein	S	Function unknown
mp2_00430	COG1940	2.3e-32	ROK family	G	Carbohydrate transport and metabolism
mp2_00431	ENOG410XW6H	5.2e-14	conserved domain protein	S	Function unknown
mp2_00722	ENOG410XX5M	1.9e-18	NA	S	Function unknown
mp2_00723	COG0693	7.7e-30	PfpI family	S	Function unknown
mp2_00720	COG1902	2.3e-92	NADH flavin oxidoreductase, NADH oxidase	C	Energy production and conversion
mp2_00726	ENOG410Y37U	7.6e-29	NA	S	Function unknown
mp2_00727	COG0580	2.6e-52	Channel that permits osmotically driven movement of water in both directions. It is involved in the osmoregulation and in the maintenance of cell turgor during volume expansion in rapidly growing cells. It mediates rapid entry or exit of water in response to abrupt changes in osmolarity (By similarity)	G	Carbohydrate transport and metabolism
mp2_00724	ENOG4111X46	1.7e-35	transposase	L	Replication, recombination and repair
mp2_00725	ENOG410XPIG	4.1e-57	Integrase core domain	L	Replication, recombination and repair
mp2_00728	COG3527	1.1e-69	Alpha-acetolactate decarboxylase	Q	Secondary metabolites biosynthesis, transport and catabolism
mp2_00898	ENOG410YDEJ	8.4e-103	NA	S	Function unknown
mp2_00899	COG1131	2.9e-76	(ABC) transporter	V	Defense mechanisms
mp2_00890	ENOG410ZWZF	3e-52	integral membrane protein	S	Function unknown
mp2_00891	COG1307	3.2e-74	degv family	S	Function unknown
mp2_00892	COG0580	1.4e-24	Channel that permits osmotically driven movement of water in both directions. It is involved in the osmoregulation and in the maintenance of cell turgor during volume expansion in rapidly growing cells. It mediates rapid entry or exit of water in response to abrupt changes in osmolarity (By similarity)	G	Carbohydrate transport and metabolism
mp2_00893	ENOG41123TD	0.00069	NADH dehydrogenase (Ubiquinone) Fe-S protein 5, 15kDa (NADH-coenzyme Q reductase)	C	Energy production and conversion
mp2_00894	ENOG410XNN3	2.4e-138	drug resistance transporter emrb qaca subfamily	P	Inorganic ion transport and metabolism
mp2_00895	ENOG41123MF	0.00069	NA	S	Function unknown
mp2_00896	COG2233	1.7e-97	permease	F	Nucleotide transport and metabolism
mp2_00897	COG0252	8.5e-86	L-asparaginase	E	Amino acid transport and metabolism
mp2_00948	ENOG410ZW43	0.00023	Plasmid pRiA4b ORF-3-like protein	S	Function unknown
mp2_00949	COG3338	2e-36	Carbonic anhydrase	P	Inorganic ion transport and metabolism
mp2_00942	COG0014	6.3e-170	Catalyzes the NADPH dependent reduction of L-gamma- glutamyl 5-phosphate into L-glutamate 5-semialdehyde and phosphate. The product spontaneously undergoes cyclization to form 1-pyrroline-5-carboxylate (By similarity)	E	Amino acid transport and metabolism
mp2_00943	COG0263	1.6e-98	Catalyzes the transfer of a phosphate group to glutamate to form glutamate 5-phosphate which rapidly cyclizes to 5- oxoproline (By similarity)	E	Amino acid transport and metabolism
mp2_00940	COG1072	5.8e-77	pantothenate kinase activity	H	Coenzyme transport and metabolism
mp2_00941	COG0519	1.3e-273	Catalyzes the synthesis of GMP from XMP (By similarity)	F	Nucleotide transport and metabolism
mp2_00946	ENOG4111JYN	1.4e-126	ABC transporter, ATP-binding protein-related protein	S	Function unknown
mp2_00947	COG1053	1.6e-120	Succinate DeHydrogenase	C	Energy production and conversion
mp2_00944	ENOG410ZWF2	9.1e-81	Membrane	S	Function unknown
mp2_00945	COG1064	2.7e-95	alcohol dehydrogenase	C	Energy production and conversion
mp2_01440	COG3619	2.9e-52	membrAne	S	Function unknown
mp2_01441	COG2244	4.9e-65	Polysaccharide biosynthesis protein	M	Cell wall/membrane/envelope biogenesis
mp2_01442	COG0495	0	Leucyl-trna synthetase	J	Translation, ribosomal structure and biogenesis
mp2_01443	ENOG410ZWK3	3.5e-13	methyltransferase, type 11	S	Function unknown
mp2_01444	ENOG410XNN3	6.5e-142	drug resistance transporter emrb qaca subfamily	P	Inorganic ion transport and metabolism
mp2_01445	COG0192	1.7e-200	Catalyzes the formation of S-adenosylmethionine from methionine and ATP	H	Coenzyme transport and metabolism
mp2_00090	ENOG410Z4C0	0.00018	Protein of unknown function DUF104	S	Function unknown
mp2_00091	COG3646	3.4e-40	Phage regulatory protein Rha (Phage_pRha)	S	Function unknown
mp2_00093	ENOG410ZA16	1.1e-12	HTH_XRE	S	Function unknown
mp2_00094	COG1974	2e-46	Represses a number of genes involved in the response to DNA damage (SOS response), including recA and lexA. In the presence of single-stranded DNA, RecA interacts with LexA causing an autocatalytic cleavage which disrupts the DNA-binding part of LexA, leading to derepression of the SOS regulon and eventually DNA repair (By similarity)	K	Transcription
mp2_00095	ENOG410YZN4	4.2e-07	NA	S	Function unknown
mp2_00096	ENOG41125I9	6.3e-09	tcdA-E operon negative regulator	S	Function unknown
mp2_00097	ENOG410ZZ34	2.5e-05	NA	S	Function unknown
mp2_00098	COG0732	8.3e-51	Restriction modification system DNA (Specificity	V	Defense mechanisms
mp2_00099	ENOG411214D	1.5e-08	DNA-binding protein	S	Function unknown
mp2_00546	COG0359	6.3e-43	Binds to the 23S rRNA (By similarity)	J	Translation, ribosomal structure and biogenesis
mp2_00547	COG3887	7.7e-243	manganese ion binding	T	Signal transduction mechanisms
mp2_00544	ENOG410ZVV9	9.8e-137	Major Facilitator	G	Carbohydrate transport and metabolism
mp2_00545	COG0305	6.7e-112	Replicative dna helicase	L	Replication, recombination and repair
mp2_00542	COG4166	1.2e-104	peptide transport	E	Amino acid transport and metabolism
mp2_00543	COG1228	7.6e-81	amidohydrolase	Q	Secondary metabolites biosynthesis, transport and catabolism
mp2_00540	COG1052	4.4e-71	Dehydrogenase	C	Energy production and conversion
mp2_00541	COG0436	6.9e-83	aminotransferase	E	Amino acid transport and metabolism
mp2_00548	COG0238	1.4e-30	Binds as a heterodimer with protein S6 to the central domain of the 16S rRNA, where it helps stabilize the platform of the 30S subunit (By similarity)	J	Translation, ribosomal structure and biogenesis
mp2_00549	COG0629	2.9e-39	single-stranded DNA-binding protein	L	Replication, recombination and repair
mp2_01156	ENOG4111WMR	1.4e-60	TPR repeatcontaining protein	S	Function unknown
mp2_01157	COG0050	4.3e-219	This protein promotes the GTP-dependent binding of aminoacyl-tRNA to the A-site of ribosomes during protein biosynthesis (By similarity)	J	Translation, ribosomal structure and biogenesis
mp2_01154	COG0184	5.3e-35	Forms an intersubunit bridge (bridge B4) with the 23S rRNA of the 50S subunit in the ribosome (By similarity)	J	Translation, ribosomal structure and biogenesis
mp2_01155	COG0595	1.6e-150	Metallo-Beta-Lactamase	S	Function unknown
mp2_01152	COG1466	6.5e-74	DNA polymerase III (delta' subunit)	L	Replication, recombination and repair
mp2_01153	COG0268	3.2e-24	Binds directly to 16S ribosomal RNA (By similarity)	J	Translation, ribosomal structure and biogenesis
mp2_01150	COG2131	3.5e-44	dCMP deaminase activity	F	Nucleotide transport and metabolism
mp2_01151	COG2333	3.9e-132	DNA internalization-related competence protein ComEC Rec2	S	Function unknown
mp2_01158	COG0544	1e-120	Involved in protein export. Acts as a chaperone by maintaining the newly synthesized protein in an open conformation	O	Posttranslational modification, protein turnover, chaperones
mp2_01159	COG1219	2.1e-165	ATP-dependent specificity component of the Clp protease. It directs the protease to specific substrates. Can perform chaperone functions in the absence of ClpP (By similarity)	O	Posttranslational modification, protein turnover, chaperones
mp2_00403	ENOG411248T	1.3e-33	transcriptional regulator, merr family	K	Transcription
mp2_00402	COG0599	1.2e-27	Antioxidant protein with alkyl hydroperoxidase activity. Required for the reduction of the AhpC active site cysteine residues and for the regeneration of the AhpC enzyme activity (By similarity)	S	Function unknown
mp2_00401	COG0599	1.8e-33	Antioxidant protein with alkyl hydroperoxidase activity. Required for the reduction of the AhpC active site cysteine residues and for the regeneration of the AhpC enzyme activity (By similarity)	S	Function unknown
mp2_00400	ENOG410YUZJ	0.00013	Domain of unknown function (DUF802)	S	Function unknown
mp2_00407	ENOG411248T	7.1e-31	transcriptional regulator, merr family	K	Transcription
mp2_00406	ENOG4111KHV	1.4e-42	transcriptional regulator	K	Transcription
mp2_00405	COG1654	3.5e-84	biotin-[acetyl-CoA-carboxylase] ligase activity	H	Coenzyme transport and metabolism
mp2_00404	ENOG410Y6KR	9.5e-06	NA	S	Function unknown
mp2_00409	ENOG410YJE9	3.4e-41	ABC superfamily ATP binding cassette transporter membrane protein	S	Function unknown
mp2_00408	COG0656	4.7e-93	reductase	S	Function unknown
mp2_00717	COG1622	7.7e-05	Subunits I and II form the functional core of the enzyme complex. Electrons originating in cytochrome c are transferred via heme a and Cu(A) to the binuclear center formed by heme a3 and Cu(B) (By similarity)	C	Energy production and conversion
mp2_00716	ENOG410Y44U	6e-31	Lpxtg-motif cell wall anchor domain protein	S	Function unknown
mp2_00715	COG1434	3.6e-35	conserved protein	S	Function unknown
mp2_00714	ENOG410XPIG	1.9e-57	Integrase core domain	L	Replication, recombination and repair
mp2_00713	ENOG4111X46	2.5e-34	transposase	L	Replication, recombination and repair
mp2_00711	ENOG4111G0I	2.8e-26	HTH_MARR	K	Transcription
mp2_00710	COG0028	8.1e-141	acetolactate synthase	E	Amino acid transport and metabolism
mp2_00719	ENOG410Z1H8	4.7e-05	NA	S	Function unknown
mp2_00718	ENOG410ZVCH	2.7e-147	Major Facilitator	G	Carbohydrate transport and metabolism
mp2_00979	COG1989	2.8e-28	Cleaves type-4 fimbrial leader sequence and methylates the N-terminal (generally Phe) residue (By similarity)	NOU	Cell motility,Posttranslational modification, protein turnover, chaperones,Intracellular trafficking, secretion, and vesicular transport
mp2_00978	COG0085	0	DNA-dependent RNA polymerase catalyzes the transcription of DNA into RNA using the four ribonucleoside triphosphates as substrates (By similarity)	K	Transcription
mp2_00977	COG0085	0	DNA-dependent RNA polymerase catalyzes the transcription of DNA into RNA using the four ribonucleoside triphosphates as substrates (By similarity)	K	Transcription
mp2_00976	COG0542	2.5e-252	ATP-dependent CLP protease ATP-binding subunit	O	Posttranslational modification, protein turnover, chaperones
mp2_00975	COG4463	1.8e-53	transcriptional regulator, ctsr	K	Transcription
mp2_01439	COG0063	3.8e-58	Together with NAD(P)HX epimerase, which catalyzes the epimerization of the S- and R-forms, the enzyme allows the repair of both epimers of NAD(P)HX, a damaged form of NAD(P)H that is a result of enzymatic or heat-dependent hydration (By similarity)	G	Carbohydrate transport and metabolism
mp2_01438	COG0624	2.3e-33	succinyl-diaminopimelate desuccinylase activity	E	Amino acid transport and metabolism
mp2_01435	COG4934	1.4e-95	peptidase	O	Posttranslational modification, protein turnover, chaperones
mp2_01434	ENOG410YD6S	0.0001	STYKc	T	Signal transduction mechanisms
mp2_01437	COG1428	2e-52	Deoxynucleoside kinase	F	Nucleotide transport and metabolism
mp2_01436	COG1970	9.3e-50	Channel that opens in response to stretch forces in the membrane lipid bilayer. May participate in the regulation of osmotic pressure changes within the cell (By similarity)	M	Cell wall/membrane/envelope biogenesis
mp2_01431	COG0769	3.2e-118	Catalyzes the addition of meso-diaminopimelic acid to the nucleotide precursor UDP-N-acetylmuramoyl-L-alanyl-D-glutamate (UMAG) in the biosynthesis of bacterial cell-wall peptidoglycan (By similarity)	M	Cell wall/membrane/envelope biogenesis
mp2_01430	COG3919	5.4e-102	ATP-grasp	S	Function unknown
mp2_01433	COG0178	2.3e-273	The UvrABC repair system catalyzes the recognition and processing of DNA lesions. UvrA is an ATPase and a DNA-binding protein. A damage recognition complex composed of 2 UvrA and 2 UvrB subunits scans DNA for abnormalities. When the presence of a lesion has been verified by UvrB, the UvrA molecules dissociate (By similarity)	L	Replication, recombination and repair
mp2_01432	COG0367	2.4e-85	asparagine synthetase	E	Amino acid transport and metabolism
mp2_00393	COG0474	2.2e-119	P-type atpase	P	Inorganic ion transport and metabolism
mp2_00392	ENOG41123H7	2.5e-57	Domain of unknown function (DUF1836)	S	Function unknown
mp2_00391	COG1418	1.9e-37	Endoribonuclease that initiates mRNA decay (By similarity)	S	Function unknown
mp2_00390	COG2606	1.7e-32	YbaK ebsC protein	S	Function unknown
mp2_00397	ENOG4111WFA	1.1e-35	NA	S	Function unknown
mp2_00396	COG0112	1.9e-163	Catalyzes the reversible interconversion of serine and glycine with tetrahydrofolate (THF) serving as the one-carbon carrier. This reaction serves as the major source of one-carbon groups required for the biosynthesis of purines, thymidylate, methionine, and other important biomolecules. Also exhibits THF- independent aldolase activity toward beta-hydroxyamino acids, producing glycine and aldehyd…	E	Amino acid transport and metabolism
mp2_00395	COG3548	1.4e-06	integral membrane protein	S	Function unknown
mp2_00394	COG0656	6.4e-89	reductase	S	Function unknown
mp2_00399	COG1268	1.1e-42	bioY protein	S	Function unknown
mp2_00151	COG0148	1.8e-180	Catalyzes the reversible conversion of 2- phosphoglycerate into phosphoenolpyruvate. It is essential for the degradation of carbohydrates via glycolysis (By similarity)	G	Carbohydrate transport and metabolism
mp2_00150	COG0038	4.5e-72	chloride channel	P	Inorganic ion transport and metabolism
mp2_01381	COG0229	8.4e-70	)-reductase	O	Posttranslational modification, protein turnover, chaperones
mp2_00152	COG0149	9.9e-94	triosephosphate isomerase	G	Carbohydrate transport and metabolism
mp2_01387	COG0344	4.8e-58	Catalyzes the transfer of an acyl group from acyl- phosphate (acyl-PO(4)) to glycerol-3-phosphate (G3P) to form lysophosphatidic acid (LPA). This enzyme utilizes acyl-phosphate as fatty acyl donor, but not acyl-CoA or acyl-ACP (By similarity)	S	Function unknown
mp2_01386	COG0187	5e-277	DNA gyrase negatively supercoils closed circular double- stranded DNA in an ATP-dependent manner and also catalyzes the interconversion of other topological isomers of double-stranded DNA rings, including catenanes and knotted rings (By similarity)	L	Replication, recombination and repair
mp2_01385	COG0188	9.2e-242	DNA gyrase negatively supercoils closed circular double- stranded DNA in an ATP-dependent manner and also catalyzes the interconversion of other topological isomers of double-stranded DNA rings, including catenanes and knotted rings (By similarity)	L	Replication, recombination and repair
mp2_00156	COG0740	1e-96	Cleaves peptides in various proteins in a process that requires ATP hydrolysis. Has a chymotrypsin-like activity. Plays a major role in the degradation of misfolded proteins (By similarity)	O	Posttranslational modification, protein turnover, chaperones
mp2_00159	COG0178	0	The UvrABC repair system catalyzes the recognition and processing of DNA lesions. UvrA is an ATPase and a DNA-binding protein. A damage recognition complex composed of 2 UvrA and 2 UvrB subunits scans DNA for abnormalities. When the presence of a lesion has been verified by UvrB, the UvrA molecules dissociate (By similarity)	L	Replication, recombination and repair
mp2_00158	COG0391	4.2e-112	Catalyzes the transfer of the 2-phospholactate moiety from lactyl (2) diphospho-(5')guanosine (LPPG) to 7,8-didemethyl- 8-hydroxy-5-deazariboflavin (FO) with the formation of the L- lactyl phosphodiester of 7,8-didemethyl-8-hydroxy-5- deazariboflavin (F420-0) and GMP (By similarity)	S	Function unknown
mp2_01389	ENOG4111FPD	2.1e-84	Two component transcriptional regulator, winged helix family	T	Signal transduction mechanisms
mp2_01388	COG0642	2.4e-91	Histidine kinase	T	Signal transduction mechanisms
mp2_01541	COG0766	3.4e-198	Cell wall formation. Adds enolpyruvyl to UDP-N- acetylglucosamine (By similarity)	M	Cell wall/membrane/envelope biogenesis
mp2_01540	COG1077	3.5e-153	Rod shape-determining protein, MreB	D	Cell cycle control, cell division, chromosome partitioning
mp2_01543	ENOG4111TPV	2.1e-30	Produces ATP from ADP in the presence of a proton gradient across the membrane (By similarity)	S	Function unknown
mp2_01542	ENOG410Y094	1.1e-18	Protein of unknown function (DUF1146)	S	Function unknown
mp2_01545	COG0224	3.8e-71	Produces ATP from ADP in the presence of a proton gradient across the membrane. The gamma chain is believed to be important in regulating ATPase activity and the flow of protons through the CF(0) complex (By similarity)	C	Energy production and conversion
mp2_01544	COG0055	9.1e-264	Produces ATP from ADP in the presence of a proton gradient across the membrane. The catalytic sites are hosted primarily by the beta subunits (By similarity)	C	Energy production and conversion
mp2_01546	COG0056	2.6e-208	Produces ATP from ADP in the presence of a proton gradient across the membrane. The alpha chain is a regulatory subunit (By similarity)	C	Energy production and conversion
mp2_01549	COG0035	6e-10	Catalyzes the conversion of uracil and 5-phospho-alpha- D-ribose 1-diphosphate (PRPP) to UMP and diphosphate (By similarity)	F	Nucleotide transport and metabolism
mp2_01548	ENOG410ZXQ9	1.2e-10	ATP synthase F0 C subunit	C	Energy production and conversion
mp2_01097	COG4862	1.1e-41	Enables the recognition and targeting of unfolded and aggregated proteins to the ClpC protease or to other proteins involved in proteolysis	O	Posttranslational modification, protein turnover, chaperones
mp2_01096	COG1234	1.3e-39	Zinc phosphodiesterase, which displays some tRNA 3'- processing endonuclease activity. Probably involved in tRNA maturation, by removing a 3'-trailer from precursor tRNA (By similarity)	S	Function unknown
mp2_01095	ENOG410Y1HV	1.4e-35	NA	S	Function unknown
mp2_01094	COG2217	8.3e-207	p-type ATPase	P	Inorganic ion transport and metabolism
mp2_01093	COG3682	9.2e-36	transcriptional repressor, copy family	K	Transcription
mp2_01099	COG1164	4.8e-175	Oligoendopeptidase f	E	Amino acid transport and metabolism
mp2_01098	COG4469	4.9e-66	Competence protein	S	Function unknown
mp2_00579	COG0685	1e-77	Methylenetetrahydrofolate reductase	E	Amino acid transport and metabolism
mp2_00578	ENOG410Y082	1.5e-25	UPF0344 protein	S	Function unknown
mp2_00573	COG0137	7.8e-177	Citrulline--aspartate ligase	E	Amino acid transport and metabolism
mp2_00572	COG3579	1.5e-181	aminopeptidase c	E	Amino acid transport and metabolism
mp2_00571	COG3579	5.8e-174	aminopeptidase c	E	Amino acid transport and metabolism
mp2_00570	COG0160	2.5e-114	transaminase activity	E	Amino acid transport and metabolism
mp2_00577	ENOG410ZYXP	2.6e-08	NA	S	Function unknown
mp2_00576	COG1126	2.6e-130	ABC transporter, (ATP-binding protein)	E	Amino acid transport and metabolism
mp2_00575	COG0765	4e-128	amino acid AbC transporter	E	Amino acid transport and metabolism
mp2_00574	COG0165	8.1e-209	argininosuccinate lyase	E	Amino acid transport and metabolism
mp2_00379	COG1073	7.7e-37	Hydrolase	S	Function unknown
mp2_00378	COG1418	1.3e-88	Endoribonuclease that initiates mRNA decay (By similarity)	S	Function unknown
mp2_01163	COG0322	4.3e-204	The UvrABC repair system catalyzes the recognition and processing of DNA lesions. UvrC both incises the 5' and 3' sides of the lesion. The N-terminal half is responsible for the 3' incision and the C-terminal half is responsible for the 5' incision (By similarity)	L	Replication, recombination and repair
mp2_00370	COG1368	1.3e-90	Sulfatase	M	Cell wall/membrane/envelope biogenesis
mp2_00373	COG4814	8.4e-57	Hydrolase	S	Function unknown
mp2_00372	COG0492	7e-60	thioredoxin reductase	O	Posttranslational modification, protein turnover, chaperones
mp2_00375	COG0561	8.4e-44	,hydrolase	S	Function unknown
mp2_01166	COG4199	7e-278	Single-stranded-DNA-specific exonuclease (RecJ)	L	Replication, recombination and repair
mp2_00377	COG0737	9.8e-96	5-Nucleotidase	F	Nucleotide transport and metabolism
mp2_01164	COG0536	2.7e-150	An essential GTPase which binds GTP, GDP and possibly (p)ppGpp with moderate affinity, with high nucleotide exchange rates and a fairly low GTP hydrolysis rate (By similarity). It may play a role in control of the cell cycle, stress response, ribosome biogenesis and in those bacteria that undergo differentiation, in morphogenesis control	S	Function unknown
mp2_01369	ENOG410ZZ48	0.00015	NA	S	Function unknown
mp2_01368	COG0458	5.5e-182	carbamoyl-phosphate synthetase ammonia chain	F	Nucleotide transport and metabolism
mp2_01361	ENOG410Z68H	1.6e-48	Pfam:RnaseH	S	Function unknown
mp2_01360	COG0665	1.6e-46	Catalyzes the last two steps in the biosynthesis of 5- methylaminomethyl-2-thiouridine (mnm(5)s(2)U) at the wobble position (U34) in tRNA. Catalyzes the FAD-dependent demodification of cmnm(5)s(2)U34 to nm(5)s(2)U34, followed by the transfer of a methyl group from S-adenosyl-L-methionine to nm(5)s(2)U34, to form mnm(5)s(2)U34 (By similarity)	E	Amino acid transport and metabolism
mp2_01363	COG2759	2.4e-260	formyltetrahydrofolate synthetase	F	Nucleotide transport and metabolism
mp2_01362	ENOG4112DA4	2.7e-39	Pore-forming protein	S	Function unknown
mp2_01365	COG0564	9.7e-71	pseudouridine synthase activity	J	Translation, ribosomal structure and biogenesis
mp2_01364	COG0597	2e-40	This protein specifically catalyzes the removal of signal peptides from prolipoproteins (By similarity)	MU	Cell wall/membrane/envelope biogenesis,Intracellular trafficking, secretion, and vesicular transport
mp2_01367	COG0505	8.7e-115	carbamoyl-phosphate synthetase glutamine chain	F	Nucleotide transport and metabolism
mp2_01366	COG2065	4.1e-63	Also displays a weak uracil phosphoribosyltransferase activity which is not physiologically significant (By similarity)	F	Nucleotide transport and metabolism
mp2_00414	ENOG411293G	1.4e-20	protein encoded in hypervariable junctions of pilus gene clusters	S	Function unknown
mp2_00415	ENOG4111KHV	5.8e-43	transcriptional regulator	K	Transcription
mp2_00416	ENOG41124E8	2.6e-47	Amino acid permease	E	Amino acid transport and metabolism
mp2_00417	ENOG410XT3D	2.6e-65	alcohol dehydrogenase	C	Energy production and conversion
mp2_00410	ENOG410XR6F	7.3e-78	(ABC) transporter	S	Function unknown
mp2_00411	ENOG410XUHA	8.8e-06	NA	S	Function unknown
mp2_00413	COG0330	9.8e-43	Band 7 protein	O	Posttranslational modification, protein turnover, chaperones
mp2_00418	ENOG410XPIG	5.7e-50	Integrase core domain	L	Replication, recombination and repair
mp2_00419	ENOG4111X46	4.7e-45	transposase	L	Replication, recombination and repair
mp2_01174	COG4224	2.1e-32	UPF0291 protein	S	Function unknown
mp2_01175	COG3763	2.8e-36	UPF0154 protein	S	Function unknown
mp2_00708	ENOG410XVF5	8.4e-25	Membrane	S	Function unknown
mp2_00709	COG3152	3.9e-24	Membrane	S	Function unknown
mp2_00700	COG0138	2.6e-220	bifunctional purine biosynthesis protein PURH	F	Nucleotide transport and metabolism
mp2_00701	COG0151	6e-174	Phosphoribosylglycinamide synthetase	F	Nucleotide transport and metabolism
mp2_00702	COG4420	1.8e-43	integral membrane protein	S	Function unknown
mp2_00703	ENOG410ZVI6	8.6e-111	Major Facilitator superfamily	G	Carbohydrate transport and metabolism
mp2_00704	ENOG41124T8	1.8e-36	NA	S	Function unknown
mp2_00705	ENOG4111HRB	3.3e-33	Transcriptional regulator	K	Transcription
mp2_00706	ENOG410XP6C	1.3e-37	NmrA Family	S	Function unknown
mp2_00707	ENOG410XUUS	4e-17	TM2 domain	S	Function unknown
mp2_01176	ENOG410Z3QU	2.1e-19	Acyltransferase	I	Lipid transport and metabolism
mp2_01148	COG3480	7.1e-107	domain protein	T	Signal transduction mechanisms
mp2_00960	COG0730	1.7e-66	Membrane	S	Function unknown
mp2_00961	ENOG410ZHIJ	7.4e-33	NA	T	Signal transduction mechanisms
mp2_00962	ENOG410XSJU	1.5e-36	NA	S	Function unknown
mp2_00963	ENOG410Y87C	7e-17	acetyltransferase	S	Function unknown
mp2_00964	COG0833	1.9e-188	permease	E	Amino acid transport and metabolism
mp2_00965	COG1428	9.1e-54	Deoxynucleoside kinase	F	Nucleotide transport and metabolism
mp2_00966	COG0172	1.3e-139	Catalyzes the attachment of serine to tRNA(Ser). Is also able to aminoacylate tRNA(Sec) with serine, to form the misacylated tRNA L-seryl-tRNA(Sec), which will be further converted into selenocysteinyl-tRNA(Sec) (By similarity)	J	Translation, ribosomal structure and biogenesis
mp2_01428	ENOG410Y082	9.8e-08	UPF0344 protein	S	Function unknown
mp2_01429	COG1794	3e-76	aspartate racemase	E	Amino acid transport and metabolism
mp2_01426	ENOG410Z8F5	1.4e-25	NA	S	Function unknown
mp2_01427	COG0039	1.3e-42	Catalyzes the reversible oxidation of malate to oxaloacetate (By similarity)	C	Energy production and conversion
mp2_01424	COG0018	2.5e-159	arginyL-tRNA synthetase	J	Translation, ribosomal structure and biogenesis
mp2_01422	COG0420	2.9e-57	Exonuclease	L	Replication, recombination and repair
mp2_01423	COG0744	2.9e-213	penicillin-binding protein	M	Cell wall/membrane/envelope biogenesis
mp2_01420	COG0760	1.1e-37	peptidyl-prolyl cis-trans isomerase	O	Posttranslational modification, protein turnover, chaperones
mp2_01421	COG4717	2e-142	NA	S	Function unknown
mp2_00384	ENOG410YXAA	1.1e-14	NA	S	Function unknown
mp2_00385	COG0564	3e-57	pseudouridine synthase activity	J	Translation, ribosomal structure and biogenesis
mp2_00386	COG3957	0	Phosphoketolase	G	Carbohydrate transport and metabolism
mp2_00387	COG2188	1.6e-42	GntR family transcriptional regulator	K	Transcription
mp2_00380	ENOG4111QT4	1.5e-50	Transcriptional regulator	K	Transcription
mp2_00381	COG0004	7.3e-110	ammonium Transporter	P	Inorganic ion transport and metabolism
mp2_00382	ENOG410YNVR	1.2e-98	sam-dependent methyltransferase	S	Function unknown
mp2_00383	ENOG410Y2WH	3.8e-50	NA	S	Function unknown
mp2_00388	ENOG4111VJR	1.2e-23	ArsR family transcriptional regulator	K	Transcription
mp2_00389	ENOG410YIQW	9.3e-74	Cadmium resistance transporter	P	Inorganic ion transport and metabolism
mp2_00142	COG2176	8e-40	Required for replicative DNA synthesis. This DNA polymerase also exhibits 3' to 5' exonuclease activity (By similarity)	L	Replication, recombination and repair
mp2_00143	ENOG4110212	5.2e-39	Acetyltransferase (GNAT) family	S	Function unknown
mp2_00140	COG0025	1.3e-78	Sodium hydrogen exchanger	P	Inorganic ion transport and metabolism
mp2_00141	COG0812	1.2e-115	cell wall formation (By similarity)	M	Cell wall/membrane/envelope biogenesis
mp2_00146	COG0692	1.1e-112	Excises uracil residues from the DNA which can arise as a result of misincorporation of dUMP residues by DNA polymerase or due to deamination of cytosine (By similarity)	L	Replication, recombination and repair
mp2_01391	COG1399	7.5e-29	nucleic acidbinding protein	S	Function unknown
mp2_00144	COG0802	5.2e-54	protein family UPF0079, ATPase	S	Function unknown
mp2_01393	ENOG4111U9G	4.1e-36	methyltransferase	S	Function unknown
mp2_00148	COG0557	7.5e-178	3'-5' exoribonuclease that releases 5'-nucleoside monophosphates and is involved in maturation of structured RNAs (By similarity)	K	Transcription
mp2_00149	ENOG41129R8	2.6e-36	Preprotein translocase, subunit SecG	U	Intracellular trafficking, secretion, and vesicular transport
mp2_01398	COG1161	1.4e-42	Required for a late step of 50S ribosomal subunit assembly. Has GTPase activity (By similarity)	S	Function unknown
mp2_01399	COG2179	2.3e-58	had superfamily (subfamily IIIa) phosphatase	S	Function unknown
mp2_01550	COG0112	8.8e-09	Catalyzes the reversible interconversion of serine and glycine with tetrahydrofolate (THF) serving as the one-carbon carrier. This reaction serves as the major source of one-carbon groups required for the biosynthesis of purines, thymidylate, methionine, and other important biomolecules. Also exhibits THF- independent aldolase activity toward beta-hydroxyamino acids, producing glycine and aldehyd…	E	Amino acid transport and metabolism
mp2_01551	COG0112	4e-13	Catalyzes the reversible interconversion of serine and glycine with tetrahydrofolate (THF) serving as the one-carbon carrier. This reaction serves as the major source of one-carbon groups required for the biosynthesis of purines, thymidylate, methionine, and other important biomolecules. Also exhibits THF- independent aldolase activity toward beta-hydroxyamino acids, producing glycine and aldehyd…	E	Amino acid transport and metabolism
mp2_00568	COG0681	4.2e-42	Signal peptidase i	U	Intracellular trafficking, secretion, and vesicular transport
mp2_00569	ENOG4110I3M	0.00028	reproduction	S	Function unknown
mp2_00564	COG0486	4.5e-139	Exhibits a very high intrinsic GTPase hydrolysis rate. Involved in the addition of a carboxymethylaminomethyl (cmnm) group at the wobble position (U34) of certain tRNAs, forming tRNA- cmnm(5)s(2)U34 (By similarity)	S	Function unknown
mp2_00565	COG0445	5.9e-284	NAD-binding protein involved in the addition of a carboxymethylaminomethyl (cmnm) group at the wobble position (U34) of certain tRNAs, forming tRNA-cmnm(5)s(2)U34 (By similarity)	D	Cell cycle control, cell division, chromosome partitioning
mp2_00566	ENOG410Y9CC	0.00045	WW domain binding protein 1-like	U	Intracellular trafficking, secretion, and vesicular transport
mp2_00567	COG0681	5.9e-42	Signal peptidase i	U	Intracellular trafficking, secretion, and vesicular transport
mp2_00560	ENOG41102MA	3.6e-25	50s ribosomal protein l34	S	Function unknown
mp2_00561	COG0594	2.4e-33	RNaseP catalyzes the removal of the 5'-leader sequence from pre-tRNA to produce the mature 5'-terminus. It can also cleave other RNA substrates such as 4.5S RNA. The protein component plays an auxiliary but essential role in vivo by binding to the 5'-leader sequence and broadening the substrate specificity of the ribozyme (By similarity)	J	Translation, ribosomal structure and biogenesis
mp2_00562	COG0706	4e-73	Required for the insertion and or proper folding and or complex formation of integral membrane proteins into the membrane. Involved in integration of membrane proteins that insert both dependently and independently of the Sec translocase complex, as well as at least some lipoproteins	U	Intracellular trafficking, secretion, and vesicular transport
mp2_00563	COG1847	1.1e-66	Single-stranded nucleic acid binding R3H domain-containing protein	S	Function unknown
mp2_00368	COG0406	1.2e-27	Phosphoglycerate mutase	G	Carbohydrate transport and metabolism
mp2_01178	COG2827	5.6e-33	Excinuclease abc c subunit domain protein	L	Replication, recombination and repair
mp2_01179	COG1052	1.6e-81	Dehydrogenase	C	Energy production and conversion
mp2_00362	COG1757	7.4e-76	Na H antiporter	C	Energy production and conversion
mp2_00363	COG3118	6.3e-26	Thioredoxin	O	Posttranslational modification, protein turnover, chaperones
mp2_00360	ENOG4111U6T	2.2e-67	lysm domain protein	S	Function unknown
mp2_01177	COG4123	7.3e-74	Specifically methylates the adenine in position 37 of tRNA(1)(Val) (anticodon cmo5UAC) (By similarity)	S	Function unknown
mp2_00366	ENOG4111YEF	1.8e-48	Transcriptional regulator	K	Transcription
mp2_00367	COG0791	1.2e-37	NLP P60 protein	M	Cell wall/membrane/envelope biogenesis
mp2_00364	COG0861	5e-59	membrane protein terC	P	Inorganic ion transport and metabolism
mp2_00365	COG1705	2.1e-45	flagellar rod assembly protein muramidase flgj	NU	Cell motility,Intracellular trafficking, secretion, and vesicular transport
mp2_01378	ENOG410XUJ9	9.9e-31	Membrane-bound metal-dependent hydrolase	S	Function unknown
mp2_01379	ENOG4112175	9.6e-79	DNA-entry nuclease	S	Function unknown
mp2_01372	ENOG4110Z96	1.3e-05	NA	S	Function unknown
mp2_01373	COG0386	9.3e-56	glutathione peroxidase	O	Posttranslational modification, protein turnover, chaperones
mp2_01370	ENOG41124BP	1.7e-29	Catalyzes the epimerization of the S- and R-forms of NAD(P)HX, a damaged form of NAD(P)H that is a result of enzymatic or heat-dependent hydration. This is a prerequisite for the S- specific NAD(P)H-hydrate dehydratase to allow the repair of both epimers of NAD(P)HX (By similarity)	S	Function unknown
mp2_01376	COG1307	2.5e-88	degv family	S	Function unknown
mp2_01377	COG1293	4.2e-103	Fibronectin-binding A domain protein	K	Transcription
mp2_01374	ENOG4111R75	3e-44	Membrane	S	Function unknown
mp2_01375	COG1893	7.1e-50	Catalyzes the NADPH-dependent reduction of ketopantoate into pantoic acid (By similarity)	H	Coenzyme transport and metabolism
mp2_00779	COG2210	3.5e-80	pyridine nucleotide-disulfide oxidoreductase	S	Function unknown
mp2_00778	ENOG410XW1D	4.9e-35	CAAX amino terminal protease family	S	Function unknown
mp2_00775	COG3971	2.1e-59	2-oxopent-4-enoate hydratase activity	Q	Secondary metabolites biosynthesis, transport and catabolism
mp2_00774	COG4166	7.7e-98	peptide transport	E	Amino acid transport and metabolism
mp2_00777	ENOG410ZM8A	3.7e-304	Putative cell wall binding repeat	G	Carbohydrate transport and metabolism
mp2_00776	ENOG410ZM8A	0	Putative cell wall binding repeat	G	Carbohydrate transport and metabolism
mp2_00771	ENOG410ZVCH	2.8e-135	Major Facilitator	G	Carbohydrate transport and metabolism
mp2_00770	ENOG41124N5	5.2e-31	NA	S	Function unknown
mp2_00773	ENOG410Z423	9.9e-05	NA	S	Function unknown
mp2_00772	ENOG410XRK0	5.3e-86	Polysaccharide biosynthesis protein	S	Function unknown
mp2_00601	ENOG4111Q2H	4.7e-47	NA	S	Function unknown
mp2_00600	ENOG4111T3C	6.9e-73	ABC 3 transport family	P	Inorganic ion transport and metabolism
mp2_00603	ENOG4111HXQ	3.6e-29	Transcriptional regulator	K	Transcription
mp2_00602	COG3757	3.7e-26	hydrolase, family 25	M	Cell wall/membrane/envelope biogenesis
mp2_00605	ENOG4111YIZ	2.2e-58	glyoxalase bleomycin resistance protein dioxygenase	S	Function unknown
mp2_00604	COG0481	4.1e-218	Required for accurate and efficient protein synthesis under certain stress conditions. May act as a fidelity factor of the translation reaction, by catalyzing a one-codon backward translocation of tRNAs on improperly translocated ribosomes. Back- translocation proceeds from a post-translocation (POST) complex to a pre-translocation (PRE) complex, thus giving elongation factor G a second chance to…	M	Cell wall/membrane/envelope biogenesis
mp2_00607	COG1940	2.3e-37	ROK family	G	Carbohydrate transport and metabolism
mp2_00606	COG1063	9e-72	Dehydrogenase	E	Amino acid transport and metabolism
mp2_00609	ENOG410XUV1	5.8e-28	Protein CrcB homolog	S	Function unknown
mp2_00608	ENOG410XUV1	1.8e-29	Protein CrcB homolog	S	Function unknown
mp2_00915	ENOG410XVNQ	2.3e-35	NA	S	Function unknown
mp2_00914	ENOG410XPNK	2.1e-151	NA	S	Function unknown
mp2_00917	ENOG410Z2WS	3.3e-33	NA	S	Function unknown
mp2_00916	COG1881	8.4e-18	phosphatidylethanolamine-binding protein	S	Function unknown
mp2_00911	ENOG410XP61	3.9e-49	Transcriptional regulator	K	Transcription
mp2_00910	COG0531	5.3e-148	amino acid	E	Amino acid transport and metabolism
mp2_00913	ENOG410XPIG	5.7e-50	Integrase core domain	L	Replication, recombination and repair
mp2_00912	ENOG4111X46	6.5e-45	transposase	L	Replication, recombination and repair
mp2_00919	COG1101	3e-101	ABC transporter, (ATP-binding protein)	S	Function unknown
mp2_00918	COG2084	5.4e-92	Dehydrogenase	I	Lipid transport and metabolism
mp2_00829	ENOG410ZWF2	1.6e-66	Membrane	S	Function unknown
mp2_00828	ENOG410ZWF2	1.3e-73	Membrane	S	Function unknown
mp2_00821	COG1087	7.5e-128	udp-glucose 4-epimerase	M	Cell wall/membrane/envelope biogenesis
mp2_00820	COG0304	3.4e-151	Catalyzes the condensation reaction of fatty acid synthesis by the addition to an acyl acceptor of two carbons from malonyl-ACP (By similarity)	I	Lipid transport and metabolism
mp2_00823	ENOG410ZWF2	9.8e-89	Membrane	S	Function unknown
mp2_00822	COG0656	1.3e-97	reductase	S	Function unknown
mp2_00825	COG2409	1.4e-165	MmpL domain protein	S	Function unknown
mp2_00824	ENOG410XUX9	2.8e-36	Transcriptional regulator	K	Transcription
mp2_00827	COG0531	2.6e-188	amino acid	E	Amino acid transport and metabolism
mp2_00826	ENOG4111UQ3	3e-81	Membrane	S	Function unknown
mp2_01413	COG0073	6.2e-22	Is required not only for elongation of protein synthesis but also for the initiation of all mRNA translation through initiator tRNA(fMet) aminoacylation (By similarity)	J	Translation, ribosomal structure and biogenesis
mp2_01412	COG1674	1.2e-181	cell division protein FtsK	D	Cell cycle control, cell division, chromosome partitioning
mp2_01411	COG0773	7.3e-149	cell wall formation (By similarity)	M	Cell wall/membrane/envelope biogenesis
mp2_01410	COG0670	1.5e-43	Membrane	S	Function unknown
mp2_01417	COG1131	8.7e-64	(ABC) transporter	V	Defense mechanisms
mp2_01416	COG4473	7.7e-96	(ABC) transporter	U	Intracellular trafficking, secretion, and vesicular transport
mp2_01415	COG0220	1.6e-57	Catalyzes the formation of N(7)-methylguanine at position 46 (m7G46) in tRNA (By similarity)	S	Function unknown
mp2_01414	ENOG41121K4	1.8e-44	Thioredoxin	O	Posttranslational modification, protein turnover, chaperones
mp2_01419	ENOG410Y6S9	4e-11	NA	S	Function unknown
mp2_01418	COG0537	2.3e-34	histidine triad (hIT) protein	FG	Nucleotide transport and metabolism,Carbohydrate transport and metabolism
mp2_00177	COG2344	3.3e-81	Modulates transcription in response to changes in cellular NADH NAD( ) redox state (By similarity)	K	Transcription
mp2_00176	COG0234	1.7e-35	Binds to cpn60 in the presence of Mg-ATP and suppresses the ATPase activity of the latter (By similarity)	O	Posttranslational modification, protein turnover, chaperones
mp2_00175	COG0459	3.9e-56	Prevents misfolding and promotes the refolding and proper assembly of unfolded polypeptides generated under stress conditions (By similarity)	O	Posttranslational modification, protein turnover, chaperones
mp2_00174	COG0472	7.1e-70	phospho-N-acetylmuramoyl-pentapeptide-transferase activity	M	Cell wall/membrane/envelope biogenesis
mp2_00173	COG1739	1.7e-54	protein family UPF0029, Impact, N-terminal protein	S	Function unknown
mp2_00172	COG4098	4.7e-171	Competence protein	L	Replication, recombination and repair
mp2_00171	COG1040	2.1e-45	Competence protein	S	Function unknown
mp2_00170	COG0653	1.9e-276	Part of the Sec protein translocase complex. Interacts with the SecYEG preprotein conducting channel. Has a central role in coupling the hydrolysis of ATP to the transfer of proteins into and across the cell membrane, serving	U	Intracellular trafficking, secretion, and vesicular transport
mp2_01196	COG0130	1.2e-82	Responsible for synthesis of pseudouridine from uracil- 55 in the psi GC loop of transfer RNAs (By similarity)	J	Translation, ribosomal structure and biogenesis
mp2_00179	COG0533	4.4e-129	Required for the formation of a threonylcarbamoyl group on adenosine at position 37 (t(6)A37) in tRNAs that read codons beginning with adenine (By similarity)	O	Posttranslational modification, protein turnover, chaperones
mp2_00178	COG0488	4.2e-161	(ABC) transporter	S	Function unknown
mp2_01194	COG0532	1e-257	One of the essential components for the initiation of protein synthesis. Protects formylmethionyl-tRNA from spontaneous hydrolysis and promotes its binding to the 30S ribosomal subunits. Also involved in the hydrolysis of GTP during the formation of the 70S ribosomal complex (By similarity)	J	Translation, ribosomal structure and biogenesis
mp2_00347	ENOG410XPIG	9.4e-57	Integrase core domain	L	Replication, recombination and repair
mp2_00285	COG4320	4.2e-109	Uncharacterized protein conserved in bacteria (DUF2252)	S	Function unknown
mp2_00284	COG0855	8.3e-207	Catalyzes the reversible transfer of the terminal phosphate of ATP to form a long-chain polyphosphate (polyP) (By similarity)	P	Inorganic ion transport and metabolism
mp2_00281	COG0248	7.2e-82	ppx gppa phosphatase	FP	Nucleotide transport and metabolism,Inorganic ion transport and metabolism
mp2_00280	COG1257	1.3e-85	)-reductase	I	Lipid transport and metabolism
mp2_00283	COG3973	3.7e-171	Helicase	L	Replication, recombination and repair
mp2_00282	COG0180	7.3e-101	tryptophanyltRNA synthetase	J	Translation, ribosomal structure and biogenesis
mp2_00591	COG0284	7e-45	Catalyzes the decarboxylation of orotidine 5'- monophosphate (OMP) to uridine 5'-monophosphate (UMP) (By similarity)	F	Nucleotide transport and metabolism
mp2_00590	COG0461	1.6e-57	orotate phosphoribosyltransferase activity	F	Nucleotide transport and metabolism
mp2_00593	COG3238	3.5e-79	membrAne	S	Function unknown
mp2_00592	ENOG410ZVI6	7.3e-114	Major Facilitator superfamily	G	Carbohydrate transport and metabolism
mp2_00595	ENOG41127IS	0.0007	Protein of unknown function (DUF3267)	S	Function unknown
mp2_00594	ENOG410XPIG	5.7e-50	Integrase core domain	L	Replication, recombination and repair
mp2_00596	ENOG410YXMJ	0.00023	Protein of unknown function (DUF3308)	S	Function unknown
mp2_00599	COG1121	1.3e-53	(ABC) transporter	P	Inorganic ion transport and metabolism
mp2_00598	COG0860	2.1e-61	n-acetylmuramoyl-l-alanine amidase	M	Cell wall/membrane/envelope biogenesis
mp2_01181	COG0264	1.3e-93	Associates with the EF-Tu.GDP complex and induces the exchange of GDP to GTP. It remains bound to the aminoacyl-tRNA.EF- Tu.GTP complex up to the GTP hydrolysis stage on the ribosome (By similarity)	J	Translation, ribosomal structure and biogenesis
mp2_01180	COG0052	1.7e-82	30S ribosomal protein S2	J	Translation, ribosomal structure and biogenesis
mp2_01183	COG0233	1.1e-54	Responsible for the release of ribosomes from messenger RNA at the termination of protein biosynthesis. May increase the efficiency of translation by recycling ribosomes from one round of translation to another (By similarity)	J	Translation, ribosomal structure and biogenesis
mp2_01182	COG0528	2.7e-98	UMP kinase activity	F	Nucleotide transport and metabolism
mp2_01185	COG0020	3.9e-91	Catalyzes the condensation of isopentenyl diphosphate (IPP) with allylic pyrophosphates generating different type of terpenoids (By similarity)	I	Lipid transport and metabolism
mp2_01184	ENOG410Y0BX	6.7e-57	NA	S	Function unknown
mp2_01187	COG0750	3.5e-72	Membrane-associated zinc metalloprotease	M	Cell wall/membrane/envelope biogenesis
mp2_00358	COG0540	1.2e-104	aspartate transcarbamylase	F	Nucleotide transport and metabolism
mp2_01189	COG2176	1.2e-225	Required for replicative DNA synthesis. This DNA polymerase also exhibits 3' to 5' exonuclease activity (By similarity)	L	Replication, recombination and repair
mp2_00356	COG0505	5.7e-154	carbamoyl-phosphate synthetase glutamine chain	F	Nucleotide transport and metabolism
mp2_00355	COG0253	0	Catalyzes the stereoinversion of LL-2,6- diaminoheptanedioate (L,L-DAP) to meso-diaminoheptanedioate (meso- DAP), a precursor of L-lysine and an essential component of the bacterial peptidoglycan (By similarity)	E	Amino acid transport and metabolism
mp2_00354	COG0167	6.3e-66	Catalyzes the conversion of dihydroorotate to orotate	F	Nucleotide transport and metabolism
mp2_00353	COG3764	7.3e-39	(sortase) family	M	Cell wall/membrane/envelope biogenesis
mp2_00352	COG0516	6.4e-87	Catalyzes the conversion of inosine 5'-phosphate (IMP) to xanthosine 5'-phosphate (XMP), the first committed and rate- limiting step in the de novo synthesis of guanine nucleotides, and therefore plays an important role in the regulation of cell growth (By similarity)	F	Nucleotide transport and metabolism
mp2_00351	COG0104	4.5e-181	Plays an important role in the de novo pathway of purine nucleotide biosynthesis	F	Nucleotide transport and metabolism
mp2_00350	COG0015	2.6e-117	adenylosuccinate lyase	F	Nucleotide transport and metabolism
mp2_01349	COG1577	7.3e-78	mevalonate kinase	I	Lipid transport and metabolism
mp2_01348	COG1577	9.9e-86	mevalonate kinase	I	Lipid transport and metabolism
mp2_01347	ENOG410Y2NV	9e-96	NA	S	Function unknown
mp2_01346	ENOG410XYPS	6.9e-44	membrane	S	Function unknown
mp2_01345	COG3270	2.7e-176	Specifically methylates the cytosine at position 1407 (m5C1407) of 16S rRNA (By similarity)	J	Translation, ribosomal structure and biogenesis
mp2_01344	ENOG4111NRG	7.9e-36	Hydrolase	S	Function unknown
mp2_01343	COG0554	1.4e-227	Key enzyme in the regulation of glycerol uptake and metabolism (By similarity)	C	Energy production and conversion
mp2_01342	ENOG410ZZM4	2.4e-22	4-oxalocrotonate tautomerase	Q	Secondary metabolites biosynthesis, transport and catabolism
mp2_01341	COG4690	6.2e-131	dipeptidase activity	E	Amino acid transport and metabolism
mp2_01340	COG0335	1e-47	This protein is located at the 30S-50S ribosomal subunit interface and may play a role in the structure and function of the aminoacyl-tRNA binding site (By similarity)	J	Translation, ribosomal structure and biogenesis
mp2_00768	ENOG410ZXGW	3.5e-29	core-2 I-branching enzyme	S	Function unknown
mp2_00769	ENOG410ZXGW	1.3e-56	core-2 I-branching enzyme	S	Function unknown
mp2_00766	ENOG4111Q11	1.5e-89	group 1 glycosyl transferase	M	Cell wall/membrane/envelope biogenesis
mp2_00767	ENOG410ZVME	1.6e-79	Glycosyl transferase, family 2	M	Cell wall/membrane/envelope biogenesis
mp2_00764	COG4464	1.6e-75	Capsular polysaccharide biosynthesis protein	GM	Carbohydrate transport and metabolism,Cell wall/membrane/envelope biogenesis
mp2_00765	COG2148	7.6e-95	sugar transferase	M	Cell wall/membrane/envelope biogenesis
mp2_00762	COG3944	7.1e-62	biosynthesis protein	M	Cell wall/membrane/envelope biogenesis
mp2_00763	COG0489	1.2e-70	ATP-binding protein	D	Cell cycle control, cell division, chromosome partitioning
mp2_00760	COG1914	1.1e-54	H( )-stimulated, divalent metal cation uptake system (By similarity)	P	Inorganic ion transport and metabolism
mp2_00761	COG1316	2.5e-82	transcriptional	K	Transcription
mp2_00612	COG2252	5.7e-156	Xanthine uracil vitamin C permease	S	Function unknown
mp2_00613	ENOG410XNU1	2.6e-77	Aldo keto reductase	C	Energy production and conversion
mp2_00610	COG0328	2.7e-11	ribonuclease H activity	L	Replication, recombination and repair
mp2_00611	ENOG410YVJX	2.1e-05	NA	S	Function unknown
mp2_00616	COG1113	4.8e-144	amino acid	E	Amino acid transport and metabolism
mp2_00617	COG1113	1.6e-147	amino acid	E	Amino acid transport and metabolism
mp2_00614	ENOG410XWVV	3.7e-48	Saccharopine dehydrogenase related protein	S	Function unknown
mp2_00618	ENOG41127CJ	1.9e-07	NA	S	Function unknown
mp2_00619	COG2508	1.5e-28	Transcriptional regulator	K	Transcription
mp2_01394	COG0799	2.1e-44	Functions as a ribosomal silencing factor. Interacts with ribosomal protein L14 (rplN), blocking formation of intersubunit bridge B8. Prevents association of the 30S and 50S ribosomal subunits and the formation of functional ribosomes, thus repressing translation (By similarity)	S	Function unknown
mp2_01395	COG1713	2.9e-69	Metal Dependent Phosphohydrolase	H	Coenzyme transport and metabolism
mp2_01396	COG1057	2.3e-54	Catalyzes the reversible adenylation of nicotinate mononucleotide (NaMN) to nicotinic acid adenine dinucleotide (NaAD) (By similarity)	H	Coenzyme transport and metabolism
mp2_00906	COG1122	2.6e-113	ATPase activity	P	Inorganic ion transport and metabolism
mp2_00907	COG4721	1.4e-62	ABC superfamily ATP binding cassette transporter membrane protein	S	Function unknown
mp2_00904	ENOG410ZA8I	1.3e-21	NA	S	Function unknown
mp2_00905	ENOG4111MR9	6.4e-66	transporter, permease	P	Inorganic ion transport and metabolism
mp2_00902	ENOG410XPIG	2e-56	Integrase core domain	L	Replication, recombination and repair
mp2_00903	ENOG4111X46	2.5e-34	transposase	L	Replication, recombination and repair
mp2_00900	ENOG4111NSJ	6e-39	ABC transporter (permease)	S	Function unknown
mp2_00901	ENOG4111QI3	1.3e-30	(ABC) transporter	S	Function unknown
mp2_01390	ENOG410ZX13	7.1e-27	50S ribosomal protein L3-2	J	Translation, ribosomal structure and biogenesis
mp2_00908	COG1686	3e-59	Carboxypeptidase	M	Cell wall/membrane/envelope biogenesis
mp2_00909	ENOG410YNCM	1.9e-61	NA	S	Function unknown
mp2_01392	COG1323	3.4e-125	UPF0348 protein	S	Function unknown
mp2_00145	COG0280	1.2e-126	phosphate acetyltransferase	C	Energy production and conversion
mp2_00838	COG0444	9.5e-135	(ABC) transporter	EP	Amino acid transport and metabolism,Inorganic ion transport and metabolism
mp2_00839	COG4608	4.9e-119	(ABC) transporter	E	Amino acid transport and metabolism
mp2_00832	ENOG410XPIG	5.3e-56	Integrase core domain	L	Replication, recombination and repair
mp2_00833	ENOG4111UIT	1.3e-79	membrAne	S	Function unknown
mp2_00830	ENOG410ZINK	7.8e-161	NA	S	Function unknown
mp2_00831	ENOG4111X46	2e-35	transposase	L	Replication, recombination and repair
mp2_00836	ENOG41102CJ	1.9e-29	Transcriptional regulator	K	Transcription
mp2_00837	COG1278	5.8e-27	Cold shock protein	K	Transcription
mp2_00834	ENOG4112AUC	1.6e-47	NA	S	Function unknown
mp2_00835	ENOG410XUM5	3.7e-31	NA	S	Function unknown
mp2_01404	COG1484	9.5e-38	IstB domain protein ATP-binding protein	L	Replication, recombination and repair
mp2_01405	COG3611	2.9e-112	replication initiation and membrane attachment	L	Replication, recombination and repair
mp2_01406	COG1327	3.2e-72	Negatively regulates transcription of bacterial ribonucleotide reductase nrd genes and operons by binding to NrdR- boxes (By similarity)	K	Transcription
mp2_01407	COG0237	1.2e-61	Catalyzes the phosphorylation of the 3'-hydroxyl group of dephosphocoenzyme A to form coenzyme A (By similarity)	H	Coenzyme transport and metabolism
mp2_01400	COG0292	6.3e-41	Binds directly to 23S ribosomal RNA and is necessary for the in vitro assembly process of the 50S ribosomal subunit. It is not involved in the protein synthesizing functions of that subunit (By similarity)	J	Translation, ribosomal structure and biogenesis
mp2_01401	COG0291	4.1e-14	50s ribosomal protein L35	J	Translation, ribosomal structure and biogenesis
mp2_01402	COG0290	3.5e-68	IF-3 binds to the 30S ribosomal subunit and shifts the equilibrum between 70S ribosomes and their 50S and 30S subunits in favor of the free subunits, thus enhancing the availability of 30S subunits on which protein synthesis initiation begins (By similarity)	J	Translation, ribosomal structure and biogenesis
mp2_01403	COG0441	1.1e-219	threonine-tRNA ligase activity	J	Translation, ribosomal structure and biogenesis
mp2_01408	COG0266	2.6e-89	Involved in base excision repair of DNA damaged by oxidation or by mutagenic agents. Acts as DNA glycosylase that recognizes and removes damaged bases. Has a preference for oxidized purines, such as 7,8-dihydro-8-oxoguanine (8-oxoG). Has AP (apurinic apyrimidinic) lyase activity and introduces nicks in the DNA strand. Cleaves the DNA backbone by beta-delta elimination to generate a single-strand …	L	Replication, recombination and repair
mp2_01409	COG0749	3.6e-190	DNA polymerase	L	Replication, recombination and repair
mp2_00168	ENOG410YV6U	3e-09	PDZ	S	Function unknown
mp2_00169	COG1186	5.1e-111	Peptide chain release factor 2 directs the termination of translation in response to the peptide chain termination codons UGA and UAA (By similarity)	J	Translation, ribosomal structure and biogenesis
mp2_00160	COG0556	0	damaged site, the DNA wraps around one UvrB monomer. DNA wrap is dependent on ATP binding by UvrB and probably causes local melting of the DNA helix, facilitating insertion of UvrB beta-hairpin between the DNA strands. Then UvrB probes one DNA strand for the presence of a lesion. If a lesion is found the UvrA subunits dissociate and the UvrB-DNA preincision complex is formed. This complex is subs…	L	Replication, recombination and repair
mp2_00161	COG0492	4.1e-108	thioredoxin reductase	O	Posttranslational modification, protein turnover, chaperones
mp2_00162	COG1210	3.6e-126	utp--glucose-1-phosphate uridylyltransferase	M	Cell wall/membrane/envelope biogenesis
mp2_00163	COG0240	6.7e-115	glycerol-3-phosphate dehydrogenase	C	Energy production and conversion
mp2_00164	COG0682	3.5e-94	Transfers the N-acyl diglyceride group on what will become the N-terminal cysteine of membrane lipoproteins (By similarity)	M	Cell wall/membrane/envelope biogenesis
mp2_00165	COG1493	5.3e-128	Catalyzes the ATP- as well as the pyrophosphate- dependent phosphorylation of a specific serine residue in HPr, a phosphocarrier protein of the phosphoenolpyruvate-dependent sugar phosphotransferase system (PTS). HprK P also catalyzes the pyrophosphate-producing, inorganic phosphate-dependent dephosphorylation (phosphorolysis) of seryl-phosphorylated HPr (P- Ser-HPr). The two antagonistic activit…	T	Signal transduction mechanisms
mp2_00166	COG1950	3.2e-34	Membrane	S	Function unknown
mp2_00167	COG1983	5.4e-23	phage shock protein C	S	Function unknown
mp2_00298	COG0628	6.1e-47	Membrane	S	Function unknown
mp2_00299	COG2230	1.1e-122	cyclopropane-fatty-acyl-phospholipid synthase	M	Cell wall/membrane/envelope biogenesis
mp2_00296	ENOG410XWNU	5e-16	deacetylase	S	Function unknown
mp2_00297	COG0588	7.4e-103	Catalyzes the interconversion of 2-phosphoglycerate and 3-phosphoglycerate (By similarity)	G	Carbohydrate transport and metabolism
mp2_00294	COG1215	2e-57	Glycosyl transferase, family 2	M	Cell wall/membrane/envelope biogenesis
mp2_00295	ENOG410XWVZ	0.00041	Protein of unknown function (DUF973)	S	Function unknown
mp2_00292	ENOG410ZVC8	4.6e-175	drug resistance transporter emrb qaca subfamily	P	Inorganic ion transport and metabolism
mp2_00293	ENOG4111YEF	6.7e-41	Transcriptional regulator	K	Transcription
mp2_00290	COG0162	1.1e-101	Catalyzes the attachment of tyrosine to tRNA(Tyr) in a two-step reaction tyrosine is first activated by ATP to form Tyr- AMP and then transferred to the acceptor end of tRNA(Tyr) (By similarity)	J	Translation, ribosomal structure and biogenesis
mp2_00291	ENOG4111P5R	2.2e-72	NA	S	Function unknown
mp2_00582	COG2873	1.3e-223	o-acetylhomoserine	E	Amino acid transport and metabolism
mp2_00583	COG0626	8.2e-144	cystathionine	E	Amino acid transport and metabolism
mp2_00580	COG0620	6.6e-271	Catalyzes the transfer of a methyl group from 5- methyltetrahydrofolate to homocysteine resulting in methionine formation (By similarity)	E	Amino acid transport and metabolism
mp2_00581	COG1897	2.6e-77	Homoserine O-transsuccinylase	E	Amino acid transport and metabolism
mp2_00586	ENOG410XPIG	1.9e-57	Integrase core domain	L	Replication, recombination and repair
mp2_00587	ENOG4111X46	2.5e-34	transposase	L	Replication, recombination and repair
mp2_00584	COG0460	3.4e-95	homoserine dehydrogenase	E	Amino acid transport and metabolism
mp2_00585	ENOG410YW7P	9.4e-05	NA	P	Inorganic ion transport and metabolism
mp2_00588	ENOG410XRA3	2.5e-35	NA	S	Function unknown
mp2_00589	COG1502	3.1e-50	Catalyzes the reversible phosphatidyl group transfer from one phosphatidylglycerol molecule to another to form cardiolipin (CL) (diphosphatidylglycerol) and glycerol (By similarity)	I	Lipid transport and metabolism
mp2_01192	COG2740	4.2e-19	Nucleic-acid-binding protein implicated in transcription termination	K	Transcription
mp2_01193	ENOG410XXBS	8e-23	(ribosomal) protein	S	Function unknown
mp2_01190	COG0779	2.1e-55	Required for maturation of 30S ribosomal subunits (By similarity)	S	Function unknown
mp2_01191	COG0195	6.7e-166	Transcription elongation factor NusA	K	Transcription
mp2_00344	COG2365	5.3e-32	protein tyrosine serine phosphatase	T	Signal transduction mechanisms
mp2_01197	COG0196	6.7e-80	riboflavin biosynthesis protein ribF	H	Coenzyme transport and metabolism
mp2_00346	ENOG4111X46	1e-35	transposase	L	Replication, recombination and repair
mp2_01195	COG0858	1.5e-34	Associates with free 30S ribosomal subunits (but not with 30S subunits that are part of 70S ribosomes or polysomes). Essential for efficient processing of 16S rRNA. May interact with the 5'-terminal helix region of 16S rRNA (By similarity)	J	Translation, ribosomal structure and biogenesis
mp2_00348	ENOG410Y2GF	4.4e-08	NA	S	Function unknown
mp2_01198	COG1420	1.6e-95	Negative regulator of class I heat shock genes (grpE- dnaK-dnaJ and groELS operons). Prevents heat-shock induction of these operons (By similarity)	K	Transcription
mp2_01199	COG0576	3.7e-51	Participates actively in the response to hyperosmotic and heat shock by preventing the aggregation of stress-denatured proteins, in association with DnaK and GrpE. It is the nucleotide exchange factor for DnaK and may function as a thermosensor. Unfolded proteins bind initially to DnaJ	O	Posttranslational modification, protein turnover, chaperones
mp2_01350	COG3407	1.2e-100	Diphosphomevalonate decarboxylase	I	Lipid transport and metabolism
mp2_01351	COG1577	1e-69	mevalonate kinase	I	Lipid transport and metabolism
mp2_01352	COG0847	2.7e-66	DNA polymerase iii	L	Replication, recombination and repair
mp2_01353	COG5353	5.9e-42	NA	S	Function unknown
mp2_01354	COG3935	4.6e-47	DNA replication protein DnaD	L	Replication, recombination and repair
mp2_01355	COG0744	1.3e-200	penicillin-binding protein	M	Cell wall/membrane/envelope biogenesis
mp2_01356	COG3331	8.5e-72	Endonuclease that resolves Holliday junction intermediates in genetic recombination. Cleaves mobile four-strand junctions by introducing symmetrical nicks in paired strands. Promotes annealing of linear ssDNA with homologous dsDNA. Required for DNA repair, homologous recombination and chromosome segregation (By similarity)	S	Function unknown
mp2_01357	COG4474	2.3e-66	UPF0398 protein	S	Function unknown
mp2_01358	COG3599	1.1e-18	Divisome component that associates with the complex late in its assembly, after the Z-ring is formed, and is dependent on DivIC and PBP2B for its recruitment to the divisome. Together with EzrA, is a key component of the system that regulates PBP1 localization during cell cycle progression. Its main role could be the removal of PBP1 from the cell pole after pole maturation is completed. Also cont…	D	Cell cycle control, cell division, chromosome partitioning
mp2_01359	COG0116	9.9e-116	Specifically methylates the guanine in position 2445 (m2G2445) and the guanine in position 2069 (m7G2069) of 23S rRNA (By similarity)	L	Replication, recombination and repair
mp2_00753	ENOG410XUV5	1e-05	zinc finger, CCHC domain containing 10	S	Function unknown
mp2_00752	COG1114	2.5e-152	branched-chain amino acid transport system II carrier protein	E	Amino acid transport and metabolism
mp2_00751	ENOG410XSRM	2.5e-05	Iron compound ABC transporter iron compound-binding protein	P	Inorganic ion transport and metabolism
mp2_00750	COG1704	6e-48	LemA family	S	Function unknown
mp2_00757	ENOG410Y0R6	4.8e-27	NA	S	Function unknown
mp2_00756	COG0389	4.8e-61	Poorly processive error-prone DNA polymerase involved in untargeted mutagenesis. Copies undamaged DNA at stalled replication forks which arise in vivo from mismatched or misaligned primer ends. These misaligned primers can be extended by polIV. Exhibits no 3-5 exonuclease (proofreading) activity. May be involved in translesional synthesis in conjunction with the beta clamp from polIII (By similar…	L	Replication, recombination and repair
mp2_00755	ENOG41121K9	2.1e-40	integral membrane protein	S	Function unknown
mp2_00754	COG1114	7.3e-149	branched-chain amino acid transport system II carrier protein	E	Amino acid transport and metabolism
mp2_00759	ENOG4111UYR	2.4e-49	abc transporter permease protein	S	Function unknown
mp2_00758	ENOG410XZJN	1.1e-18	NA	S	Function unknown
mp2_00627	COG1454	3.2e-123	alcohol dehydrogenase	C	Energy production and conversion
mp2_00626	COG4152	1.7e-70	(ABC) transporter	S	Function unknown
mp2_00625	COG1668	7e-43	(ABC) transporter	CP	Energy production and conversion,Inorganic ion transport and metabolism
mp2_00624	COG1074	1.2e-262	The heterodimer acts as both an ATP-dependent DNA helicase and an ATP-dependent, dual-direction single-stranded exonuclease. Recognizes the chi site generating a DNA molecule suitable for the initiation of homologous recombination. The AddA nuclease domain is required for chi fragment generation	L	Replication, recombination and repair
mp2_00623	COG3857	0	The heterodimer acts as both an ATP-dependent DNA helicase and an ATP-dependent, dual-direction single-stranded exonuclease. Recognizes the chi site generating a DNA molecule suitable for the initiation of homologous recombination	L	Replication, recombination and repair
mp2_00622	COG3546	7.2e-80	Catalase	P	Inorganic ion transport and metabolism
mp2_00620	ENOG410Y5HP	0.00017	sulfocyanin	S	Function unknown
mp2_00629	COG2855	5.2e-74	Membrane	S	Function unknown
mp2_00628	ENOG410ZH1T	4.2e-06	NA	S	Function unknown
mp2_00371	COG1226	1.1e-21	PotAssium voltage-gated channel	P	Inorganic ion transport and metabolism
mp2_00939	COG3973	6.9e-179	Helicase	L	Replication, recombination and repair
mp2_00938	COG0406	1.9e-31	Phosphoglycerate mutase	G	Carbohydrate transport and metabolism
mp2_00933	COG4166	1.6e-109	peptide transport	E	Amino acid transport and metabolism
mp2_00932	COG2262	3.1e-141	GTPase that associates with the 50S ribosomal subunit and may have a role during protein synthesis or ribosome biogenesis (By similarity)	S	Function unknown
mp2_00931	COG1296	9.8e-46	AzlC Family	E	Amino acid transport and metabolism
mp2_00930	COG4392	2.9e-30	Branched-chain amino acid transport	S	Function unknown
mp2_00937	COG4608	7.8e-137	(ABC) transporter	E	Amino acid transport and metabolism
mp2_00936	COG0444	1.6e-155	(ABC) transporter	EP	Amino acid transport and metabolism,Inorganic ion transport and metabolism
mp2_00935	COG1173	3.6e-104	Binding-protein-dependent transport systems inner membrane component	P	Inorganic ion transport and metabolism
mp2_00934	COG0601	2.2e-90	Binding-protein-dependent transport systems inner membrane component	P	Inorganic ion transport and metabolism
mp2_00809	ENOG410XW2B	4.6e-19	Carrier of the growing fatty acid chain in fatty acid biosynthesis (By similarity)	I	Lipid transport and metabolism
mp2_00808	COG0332	2.8e-109	Catalyzes the condensation reaction of fatty acid synthesis by the addition to an acyl acceptor of two carbons from malonyl-ACP. Catalyzes the first condensation reaction which initiates fatty acid synthesis and may therefore play a role in governing the total rate of fatty acid production. Possesses both acetoacetyl-ACP synthase and acetyl transacylase activities. Its substrate specificity deter…	I	Lipid transport and metabolism
mp2_00807	COG0778	2.6e-24	nitroreductase	C	Energy production and conversion
mp2_00806	COG1109	2.6e-92	Catalyzes the conversion of glucosamine-6-phosphate to glucosamine-1-phosphate (By similarity)	G	Carbohydrate transport and metabolism
mp2_00805	COG0685	1.4e-46	Methylenetetrahydrofolate reductase	E	Amino acid transport and metabolism
mp2_00804	COG3410	4.3e-135	Uncharacterized conserved protein (DUF2075)	S	Function unknown
mp2_00803	COG1164	1.5e-129	Oligoendopeptidase f	E	Amino acid transport and metabolism
mp2_00802	COG4990	2.5e-42	NA	S	Function unknown
mp2_00801	COG0488	1.2e-139	(ABC) transporter	S	Function unknown
mp2_00800	COG0702	3.4e-52	epimerase dehydratase	GM	Carbohydrate transport and metabolism,Cell wall/membrane/envelope biogenesis
mp2_00119	ENOG410XPIG	1.4e-49	Integrase core domain	L	Replication, recombination and repair
mp2_00118	COG0431	9.8e-38	Nadph-dependent fmn reductase	S	Function unknown
mp2_00115	ENOG410XR24	7.5e-67	Alcohol dehydrogenase zinc-binding domain protein	C	Energy production and conversion
mp2_00114	COG3757	3.7e-29	hydrolase, family 25	M	Cell wall/membrane/envelope biogenesis
mp2_00117	COG0017	1.5e-121	asparaginyl-tRNA synthetase	J	Translation, ribosomal structure and biogenesis
mp2_00116	ENOG4111W0S	1.8e-44	4-oxalocrotonate tautomerase	S	Function unknown
mp2_00111	ENOG4111X46	1.7e-35	transposase	L	Replication, recombination and repair
mp2_00110	ENOG411038D	0.00049	PbH1	M	Cell wall/membrane/envelope biogenesis
mp2_00112	ENOG410XPIG	4.1e-57	Integrase core domain	L	Replication, recombination and repair
mp2_01509	ENOG410XQ2S	1.4e-77	(ABC) transporter	E	Amino acid transport and metabolism
mp2_01508	COG0612	4.4e-53	peptidase'	O	Posttranslational modification, protein turnover, chaperones
mp2_01505	COG0558	2.2e-47	cdp-diacylglycerol-glycerol-3-phosphate 3-phosphatidyltransferase	I	Lipid transport and metabolism
mp2_01504	COG1546	6.8e-56	competence damage-inducible protein	S	Function unknown
mp2_01507	COG0612	8.9e-57	peptidase'	O	Posttranslational modification, protein turnover, chaperones
mp2_01506	COG1426	3.3e-50	Cytoskeletal protein that is involved in cell-shape control through regulation of the length of the long axis (By similarity)	S	Function unknown
mp2_01501	COG1692	5.1e-111	metallophosphoesterase	S	Function unknown
mp2_01500	COG0249	8.2e-242	that it carries out the mismatch recognition step. This protein has a weak ATPase activity (By similarity)	L	Replication, recombination and repair
mp2_01503	COG0468	1.8e-91	Can catalyze the hydrolysis of ATP in the presence of single-stranded DNA, the ATP-dependent uptake of single-stranded DNA by duplex DNA, and the ATP-dependent hybridization of homologous single-stranded DNAs. It interacts with LexA causing its activation and leading to its autocatalytic cleavage (By similarity)	L	Replication, recombination and repair
mp2_01502	COG1418	1.1e-128	Endoribonuclease that initiates mRNA decay (By similarity)	S	Function unknown
mp2_00021	COG0009	1.3e-119	sua5 ycio yrdc ywlc family protein	J	Translation, ribosomal structure and biogenesis
mp2_00020	COG0112	2.9e-187	Catalyzes the reversible interconversion of serine and glycine with tetrahydrofolate (THF) serving as the one-carbon carrier. This reaction serves as the major source of one-carbon groups required for the biosynthesis of purines, thymidylate, methionine, and other important biomolecules. Also exhibits THF- independent aldolase activity toward beta-hydroxyamino acids, producing glycine and aldehyd…	E	Amino acid transport and metabolism
mp2_00023	COG0216	3.1e-125	Peptide chain release factor 1 directs the termination of translation in response to the peptide chain termination codons UAG and UAA (By similarity)	J	Translation, ribosomal structure and biogenesis
mp2_00022	COG2890	1.2e-52	Methylates the class 1 translation termination release factors RF1 PrfA and RF2 PrfB on the glutamine residue of the universally conserved GGQ motif (By similarity)	J	Translation, ribosomal structure and biogenesis
mp2_00025	ENOG410XRIX	1.4e-65	Cell wall biosynthesis protein	M	Cell wall/membrane/envelope biogenesis
mp2_00024	COG1435	2.9e-59	THymidine Kinase	F	Nucleotide transport and metabolism
mp2_00027	COG1680	8.1e-52	Beta-lactamase	V	Defense mechanisms
mp2_00026	COG3442	3.7e-94	CobB/CobQ-like glutamine amidotransferase domain	S	Function unknown
mp2_00029	ENOG410XNMX	1.2e-121	(ABC) transporter	V	Defense mechanisms
mp2_00028	ENOG410XNMX	2.8e-147	(ABC) transporter	V	Defense mechanisms
mp2_01211	COG0546	2.4e-22	had-superfamily hydrolase, subfamily ia, variant	S	Function unknown
mp2_01210	COG1490	5.6e-61	Hydrolyzes D-tyrosyl-tRNA(Tyr) into D-tyrosine and free tRNA(Tyr). Could be a defense mechanism against a harmful effect of D-tyrosine (By similarity)	J	Translation, ribosomal structure and biogenesis
mp2_01213	COG0124	6.3e-96	Histidyl-trna synthetase	J	Translation, ribosomal structure and biogenesis
mp2_01212	COG3001	5e-65	Fructosamine	G	Carbohydrate transport and metabolism
mp2_01215	ENOG410XPIG	5.7e-50	Integrase core domain	L	Replication, recombination and repair
mp2_01214	COG0173	8.5e-274	aspartyl-trna synthetase	J	Translation, ribosomal structure and biogenesis
mp2_01217	COG1284	7.1e-74	membrane	S	Function unknown
mp2_01216	ENOG4111X46	4.7e-45	transposase	L	Replication, recombination and repair
mp2_01219	COG1682	6.7e-52	ABC-2 type transporter	V	Defense mechanisms
mp2_01218	COG1887	3.2e-49	CDP-glycerol poly(glycerophosphate) glycerophosphotransferase	M	Cell wall/membrane/envelope biogenesis
mp2_00335	ENOG410Y3P5	1.1e-23	NA	S	Function unknown
mp2_00334	COG2265	1.3e-101	catalyzes the formation of 5-methyl-uridine at position	J	Translation, ribosomal structure and biogenesis
mp2_00337	ENOG410ZWZZ	3.1e-39	Glycosyl transferase (Group 1	M	Cell wall/membrane/envelope biogenesis
mp2_00336	ENOG410Z0H3	6.3e-28	NA	S	Function unknown
mp2_00331	COG2153	1.2e-52	#NAME?	S	Function unknown
mp2_00330	ENOG41127VD	1e-49	RNA Polymerase	S	Function unknown
mp2_00333	ENOG410YGGR	6.1e-51	NA	S	Function unknown
mp2_00338	ENOG410XPAH	3.9e-36	glycosyl transferase group 1	M	Cell wall/membrane/envelope biogenesis
mp2_01325	COG1200	1.1e-243	ATP-dependent DNA helicase recG	L	Replication, recombination and repair
mp2_01324	COG1461	2e-186	dak2 domain fusion protein ylov	S	Function unknown
mp2_01327	ENOG410ZYRB	6.6e-20	Carrier of the growing fatty acid chain in fatty acid biosynthesis (By similarity)	I	Lipid transport and metabolism
mp2_01326	COG0416	9.9e-125	Catalyzes the reversible formation of acyl-phosphate (acyl-PO(4)) from acyl- acyl-carrier-protein (acyl-ACP). This enzyme utilizes acyl-ACP as fatty acyl donor, but not acyl-CoA (By similarity)	I	Lipid transport and metabolism
mp2_01321	COG1564	7.7e-30	thiamine diphosphokinase activity	H	Coenzyme transport and metabolism
mp2_01320	COG0036	3.4e-91	ribulose-phosphate 3-epimerase activity	G	Carbohydrate transport and metabolism
mp2_01323	COG1302	2.6e-36	alkaline shock protein	S	Function unknown
mp2_01322	ENOG410ZA8C	3.9e-21	50S ribosomal protein L28	J	Translation, ribosomal structure and biogenesis
mp2_01329	COG1196	5.6e-213	Required for chromosome condensation and partitioning (By similarity)	D	Cell cycle control, cell division, chromosome partitioning
mp2_01328	COG0571	6.1e-67	Digests double-stranded RNA. Involved in the processing of primary rRNA transcript to yield the immediate precursors to the large and small rRNAs (23S and 16S). Also processes some mRNAs, and tRNAs when they are encoded in the rRNA operon (By similarity)	K	Transcription
mp2_00361	ENOG4111U6T	1.5e-51	lysm domain protein	S	Function unknown
mp2_01170	COG3525	2.2e-42	ec 3.2.1.52	G	Carbohydrate transport and metabolism
mp2_01171	COG3425	5.2e-107	hydroxymethylglutaryl-CoA synthase activity	I	Lipid transport and metabolism
mp2_01172	COG3613	1.2e-39	nucleoside 2-deoxyribosyltransferase	F	Nucleotide transport and metabolism
mp2_01173	COG1974	1.2e-47	Represses a number of genes involved in the response to DNA damage (SOS response), including recA and lexA. In the presence of single-stranded DNA, RecA interacts with LexA causing an autocatalytic cleavage which disrupts the DNA-binding part of LexA, leading to derepression of the SOS regulon and eventually DNA repair (By similarity)	K	Transcription
mp2_00249	COG2244	5.7e-56	Polysaccharide biosynthesis protein	M	Cell wall/membrane/envelope biogenesis
mp2_00248	COG1188	1.6e-21	heat shock protein	J	Translation, ribosomal structure and biogenesis
mp2_00241	COG0042	1.5e-92	Catalyzes the synthesis of dihydrouridine a modified base found in the D-loop of most tRNAs (By similarity)	J	Translation, ribosomal structure and biogenesis
mp2_00240	COG1190	1.7e-231	lysyl-trna synthetase	J	Translation, ribosomal structure and biogenesis
mp2_00243	COG0465	1.8e-200	Acts as a processive, ATP-dependent zinc metallopeptidase for both cytoplasmic and membrane proteins. Plays a role in the quality control of integral membrane proteins (By similarity)	O	Posttranslational modification, protein turnover, chaperones
mp2_00242	COG1281	1.9e-77	Redox regulated molecular chaperone. Protects both thermally unfolding and oxidatively damaged proteins from irreversible aggregation. Plays an important role in the bacterial defense system toward oxidative stress (By similarity)	O	Posttranslational modification, protein turnover, chaperones
mp2_00245	COG0037	5.3e-59	Ligates lysine onto the cytidine present at position 34 of the AUA codon-specific tRNA(Ile) that contains the anticodon CAU, in an ATP-dependent manner. Cytidine is converted to lysidine, thus changing the amino acid specificity of the tRNA from methionine to isoleucine (By similarity)	D	Cell cycle control, cell division, chromosome partitioning
mp2_00244	COG0634	4.4e-87	hypoxanthine phosphoribosyltransferase	F	Nucleotide transport and metabolism
mp2_00247	COG2919	8.3e-23	Essential cell division protein. May link together the upstream cell division proteins, which are predominantly cytoplasmic, with the downstream cell division proteins, which are predominantly periplasmic (By similarity)	D	Cell cycle control, cell division, chromosome partitioning
mp2_00246	COG1098	3.3e-50	RNA binding s1 domain protein	J	Translation, ribosomal structure and biogenesis
mp2_01039	COG0513	1.3e-86	purine NTP-dependent helicase activity	L	Replication, recombination and repair
mp2_01038	COG3757	1.8e-20	hydrolase, family 25	M	Cell wall/membrane/envelope biogenesis
mp2_01031	COG3587	1.6e-177	type IIi	V	Defense mechanisms
mp2_01030	COG2189	1.1e-86	DNA methylase	L	Replication, recombination and repair
mp2_01033	COG0553	7.5e-28	helicase	L	Replication, recombination and repair
mp2_01032	ENOG4111FM9	1.4e-99	NA	S	Function unknown
mp2_01035	COG0518	3.5e-35	Catalyzes the synthesis of GMP from XMP (By similarity)	F	Nucleotide transport and metabolism
mp2_01034	COG1715	2.3e-52	restriction	V	Defense mechanisms
mp2_01037	COG1070	1.4e-119	Carbohydrate kinase	G	Carbohydrate transport and metabolism
mp2_01036	ENOG410Y59M	7.1e-88	Amino acid permease	E	Amino acid transport and metabolism
mp2_00744	ENOG410ZY1D	3.3e-25	Abortive infection protein	S	Function unknown
mp2_00745	COG0114	3.3e-199	fumarate hydratase class II	C	Energy production and conversion
mp2_00747	COG3201	2.1e-45	Nicotinamide Mononucleotide Transporter	H	Coenzyme transport and metabolism
mp2_00740	ENOG410XX0T	2.1e-43	lytTr DNA-binding domain protein	K	Transcription
mp2_00741	ENOG410Y5NF	3.8e-18	Protein of unknown function (DUF3021)	S	Function unknown
mp2_00742	ENOG410XW1D	6.2e-38	CAAX amino terminal protease family	S	Function unknown
mp2_00743	ENOG410XW1D	4.7e-40	CAAX amino terminal protease family	S	Function unknown
mp2_00748	ENOG410XPE2	9.3e-07	tpr domain protein	S	Function unknown
mp2_00749	COG1512	1.5e-32	of methanol dehydrogenase type	S	Function unknown
mp2_00639	COG0685	2.3e-49	Methylenetetrahydrofolate reductase	E	Amino acid transport and metabolism
mp2_00630	ENOG41113QZ	0.00027	NA	S	Function unknown
mp2_00631	ENOG410ZXAG	7.7e-183	Major Facilitator	G	Carbohydrate transport and metabolism
mp2_00632	ENOG41121PJ	2.1e-31	Transcriptional regulator	K	Transcription
mp2_00633	COG1126	8.1e-135	ABC transporter, (ATP-binding protein)	E	Amino acid transport and metabolism
mp2_00634	COG0765	2.4e-133	amino acid AbC transporter	E	Amino acid transport and metabolism
mp2_00635	COG0542	4.3e-208	ATP-dependent CLP protease ATP-binding subunit	O	Posttranslational modification, protein turnover, chaperones
mp2_00637	ENOG410YNTX	0.00058	NA	S	Function unknown
mp2_00928	ENOG410XVGS	6.4e-22	NUDiX hydrolase	S	Function unknown
mp2_00929	COG0194	1.2e-28	Essential for recycling GMP and indirectly, cGMP (By similarity)	F	Nucleotide transport and metabolism
mp2_00924	COG0488	2.7e-135	(ABC) transporter	S	Function unknown
mp2_00926	ENOG410ZVHU	4.5e-167	Releases the N-terminal proline from various substrates (By similarity)	E	Amino acid transport and metabolism
mp2_00927	ENOG410XPUZ	1.3e-247	Removes N-terminal dipeptides sequentially from polypeptides having unsubstituted N-termini provided that the penultimate residue is proline (By similarity)	E	Amino acid transport and metabolism
mp2_00920	COG4120	2.1e-125	ABC transporter (permease)	S	Function unknown
mp2_00921	COG2984	1.4e-104	(ABC) transporter	S	Function unknown
mp2_00922	COG0531	6e-55	amino acid	E	Amino acid transport and metabolism
mp2_00923	ENOG4111Q4U	2.4e-30	glyoxalase domain containing 5	S	Function unknown
mp2_00810	COG0331	5.5e-95	Malonyl coA-acyl carrier protein transacylase	I	Lipid transport and metabolism
mp2_00811	ENOG410XNW1	1.9e-83	)-reductase	S	Function unknown
mp2_00812	COG0511	1.6e-24	Acetyl-CoA carboxylase, biotin carboxyl carrier protein	I	Lipid transport and metabolism
mp2_00813	COG0764	1.2e-24	Involved in unsaturated fatty acids biosynthesis. Catalyzes the dehydration of short chain beta-hydroxyacyl-ACPs and long chain saturated and unsaturated beta-hydroxyacyl-ACPs (By similarity)	I	Lipid transport and metabolism
mp2_00814	COG4770	9.4e-210	carboxylase	I	Lipid transport and metabolism
mp2_00815	COG0777	2.8e-112	Component of the acetyl coenzyme A carboxylase (ACC) complex. Biotin carboxylase (BC) catalyzes the carboxylation of biotin on its carrier protein (BCCP) and then the CO(2) group is transferred by the transcarboxylase to acetyl-CoA to form malonyl- CoA (By similarity)	I	Lipid transport and metabolism
mp2_00816	COG0825	2.6e-120	Component of the acetyl coenzyme A carboxylase (ACC) complex. First, biotin carboxylase catalyzes the carboxylation of biotin on its carrier protein (BCCP) and then the CO(2) group is transferred by the carboxyltransferase to acetyl-CoA to form malonyl-CoA (By similarity)	I	Lipid transport and metabolism
mp2_00817	COG0623	2.7e-107	Enoyl- acyl-carrier-protein reductase NADH	I	Lipid transport and metabolism
mp2_00818	COG2091	2.3e-31	4'-phosphopantetheinyl transferase	H	Coenzyme transport and metabolism
mp2_00819	COG0764	1.4e-47	Involved in unsaturated fatty acids biosynthesis. Catalyzes the dehydration of short chain beta-hydroxyacyl-ACPs and long chain saturated and unsaturated beta-hydroxyacyl-ACPs (By similarity)	I	Lipid transport and metabolism
mp2_00108	ENOG41117V9	0.00054	DNA double-strand break repair and V(D)J recombination protein XRCC4	S	Function unknown
mp2_00109	COG3953	2.4e-39	Tail protein	S	Function unknown
mp2_00104	COG4990	2.6e-09	NA	S	Function unknown
mp2_00100	ENOG410ZQAS	1.4e-23	HTH_XRE	S	Function unknown
mp2_00101	ENOG410XRH6	9.6e-69	Integrase	L	Replication, recombination and repair
mp2_01518	COG0525	0	amino acids such as threonine, to avoid such errors, it has a posttransfer editing activity that hydrolyzes mischarged Thr-tRNA(Val) in a tRNA-dependent manner (By similarity)	J	Translation, ribosomal structure and biogenesis
mp2_01519	COG2077	3.2e-51	Has antioxidant activity. Could remove peroxides or H(2)O(2) (By similarity)	O	Posttranslational modification, protein turnover, chaperones
mp2_01516	COG1077	1.9e-153	Rod shape-determining protein, MreB	D	Cell cycle control, cell division, chromosome partitioning
mp2_01517	COG0285	4.9e-136	Folylpolyglutamate synthase	H	Coenzyme transport and metabolism
mp2_01514	ENOG411294E	4.2e-42	Rod shape-determining protein MreD	M	Cell wall/membrane/envelope biogenesis
mp2_01515	COG1792	1.2e-59	regulation of cell shape	M	Cell wall/membrane/envelope biogenesis
mp2_01512	COG2894	5.8e-110	site-determining protein	D	Cell cycle control, cell division, chromosome partitioning
mp2_01513	COG0850	4.3e-28	Cell division inhibitor that blocks the formation of polar Z ring septums. Rapidly oscillates between the poles of the cell to destabilize FtsZ filaments that have formed before they mature into polar Z rings. Prevents FtsZ polymerization (By similarity)	D	Cell cycle control, cell division, chromosome partitioning
mp2_01510	COG1126	2.7e-87	ABC transporter, (ATP-binding protein)	E	Amino acid transport and metabolism
mp2_01511	COG0765	5e-81	amino acid AbC transporter	E	Amino acid transport and metabolism
mp2_00032	COG1335	2.5e-33	isochorismatase	Q	Secondary metabolites biosynthesis, transport and catabolism
mp2_00033	COG3759	5.7e-36	Membrane	S	Function unknown
mp2_00030	ENOG410YX1U	8e-38	NA	S	Function unknown
mp2_00036	ENOG4111P9V	8.3e-06	NA	S	Function unknown
mp2_00037	ENOG410ZUS1	1.9e-08	NA	S	Function unknown
mp2_00034	ENOG410XY5V	1.1e-12	NA	S	Function unknown
mp2_00035	COG3757	4.1e-35	hydrolase, family 25	M	Cell wall/membrane/envelope biogenesis
mp2_00038	COG3371	1.9e-05	Membrane	S	Function unknown
mp2_00039	ENOG410Z9BY	0.00025	SMI1_KNR4	S	Function unknown
mp2_01202	COG0481	2.4e-300	Required for accurate and efficient protein synthesis under certain stress conditions. May act as a fidelity factor of the translation reaction, by catalyzing a one-codon backward translocation of tRNAs on improperly translocated ribosomes. Back- translocation proceeds from a post-translocation (POST) complex to a pre-translocation (PRE) complex, thus giving elongation factor G a second chance to…	M	Cell wall/membrane/envelope biogenesis
mp2_01203	COG2233	2.5e-74	permease	F	Nucleotide transport and metabolism
mp2_01200	ENOG410XPXW	3.9e-175	MreB/Mbl protein	S	Function unknown
mp2_01201	COG0484	1.5e-122	ATP binding to DnaK triggers the release of the substrate protein, thus completing the reaction cycle. Several rounds of ATP-dependent interactions between DnaJ, DnaK and GrpE are required for fully efficient folding. Also involved, together with DnaK and GrpE, in the DNA replication of plasmids through activation of initiation proteins (By similarity)	O	Posttranslational modification, protein turnover, chaperones
mp2_01206	ENOG411277Q	1.1e-50	NA	S	Function unknown
mp2_01207	COG2264	7.5e-70	Methylates ribosomal protein L11 (By similarity)	J	Translation, ribosomal structure and biogenesis
mp2_01204	COG1887	4.3e-202	CDP-glycerol poly(glycerophosphate) glycerophosphotransferase	M	Cell wall/membrane/envelope biogenesis
mp2_01205	ENOG4111UIT	8.4e-89	membrAne	S	Function unknown
mp2_01208	COG1385	4.7e-63	Specifically methylates the N3 position of the uracil ring of uridine 1498 (m3U1498) in 16S rRNA. Acts on the fully assembled 30S ribosomal subunit (By similarity)	S	Function unknown
mp2_01209	COG0317	1.5e-239	In eubacteria ppGpp (guanosine 3'-diphosphate 5-' diphosphate) is a mediator of the stringent response that coordinates a variety of cellular activities in response to changes in nutritional abundance (By similarity)	KT	Transcription,Signal transduction mechanisms
mp2_00326	ENOG4110T6V	0.0002	Pfam:DUF227	S	Function unknown
mp2_00327	ENOG410XRIM	2.9e-60	LysR family (Transcriptional regulator	K	Transcription
mp2_00324	ENOG4110CU0	0.00018	NA	S	Function unknown
mp2_00325	ENOG410Y9UQ	0.00014	NA	S	Function unknown
mp2_00322	ENOG410XPIG	1.4e-49	Integrase core domain	L	Replication, recombination and repair
mp2_00323	ENOG4111X46	9e-45	transposase	L	Replication, recombination and repair
mp2_00320	ENOG410ZINK	2.5e-140	NA	S	Function unknown
mp2_00321	ENOG410XSDQ	1.2e-89	Prophage Lp1 protein 65	S	Function unknown
mp2_00328	ENOG410XZ4F	5.7e-26	Protein of unknown function (DUF2922)	S	Function unknown
mp2_00329	ENOG410ZHED	3.3e-07	NA	S	Function unknown
mp2_01336	COG0228	6.7e-43	30s ribosomal protein S16	J	Translation, ribosomal structure and biogenesis
mp2_01337	COG1837	4e-18	UPF0109 protein	S	Function unknown
mp2_01334	COG3864	3.7e-81	VWA-like domain (DUF2201)	S	Function unknown
mp2_01335	ENOG410ZX98	9.3e-05	Integrase core domain	L	Replication, recombination and repair
mp2_01332	COG0541	2.7e-205	Involved in targeting and insertion of nascent membrane proteins into the cytoplasmic membrane. Binds to the hydrophobic signal sequence of the ribosome-nascent chain (RNC) as it emerges from the ribosomes. The SRP-RNC complex is then targeted to the cytoplasmic membrane where it interacts with the SRP receptor FtsY	U	Intracellular trafficking, secretion, and vesicular transport
mp2_01333	COG0714	1.8e-16	ATPase activity	S	Function unknown
mp2_01330	COG0552	1.2e-146	Involved in targeting and insertion of nascent membrane proteins into the cytoplasmic membrane. Acts as a receptor for the complex formed by the signal recognition particle (SRP) and the ribosome-nascent chain (RNC)	U	Intracellular trafficking, secretion, and vesicular transport
mp2_01331	COG2739	2.3e-42	Might take part in the signal recognition particle (SRP) pathway. This is inferred from the conservation of its genetic proximity to ftsY ffh. May be a regulatory protein (By similarity)	S	Function unknown
mp2_01338	COG0806	3.9e-41	An accessory protein needed during the final step in the assembly of 30S ribosomal subunit, possibly for assembly of the head region. Probably interacts with S19. Essential for efficient processing of 16S rRNA. May be needed both before and after RbfA during the maturation of 16S rRNA. It has affinity for free ribosomal 30S subunits but not for 70S ribosomes (By similarity)	J	Translation, ribosomal structure and biogenesis
mp2_01339	COG0336	4.5e-112	Specifically methylates guanosine-37 in various tRNAs (By similarity)	J	Translation, ribosomal structure and biogenesis
mp2_00258	COG0770	5.3e-138	UDP-N-acetylmuramoylalanyl-D-glutamyl-2,6-diaminopimelate-D-alanyl-D-alanine ligase activity	M	Cell wall/membrane/envelope biogenesis
mp2_00259	COG0394	6.9e-18	PHOsphatase	T	Signal transduction mechanisms
mp2_00252	COG0039	5.6e-60	Catalyzes the reversible oxidation of malate to oxaloacetate (By similarity)	C	Energy production and conversion
mp2_00253	ENOG410ZNI1	4.2e-35	Cbs domain containing protein	S	Function unknown
mp2_00250	COG1197	0	transcriptioN-repair coupling factor	L	Replication, recombination and repair
mp2_00251	COG0193	5.8e-73	The natural substrate for this enzyme may be peptidyl- tRNAs which drop off the ribosome during protein synthesis (By similarity)	J	Translation, ribosomal structure and biogenesis
mp2_00256	COG0787	7.3e-132	Catalyzes the interconversion of L-alanine and D- alanine. May also act on other amino acids (By similarity)	M	Cell wall/membrane/envelope biogenesis
mp2_00257	COG0513	1.6e-177	purine NTP-dependent helicase activity	L	Replication, recombination and repair
mp2_00254	COG2337	9.3e-46	Toxic component of a toxin-antitoxin (TA) module (By similarity)	T	Signal transduction mechanisms
mp2_00255	ENOG410Y5U8	0.00089	NA	S	Function unknown
mp2_01028	COG1597	8.4e-49	diacylglycerol kinase	I	Lipid transport and metabolism
mp2_01029	COG2265	7.5e-113	catalyzes the formation of 5-methyl-uridine at position	J	Translation, ribosomal structure and biogenesis
mp2_01022	COG0210	6e-162	helicase	L	Replication, recombination and repair
mp2_01023	COG0272	8.5e-274	DNA ligase (NAD+) activity	L	Replication, recombination and repair
mp2_01020	COG1705	2.2e-55	flagellar rod assembly protein muramidase flgj	NU	Cell motility,Intracellular trafficking, secretion, and vesicular transport
mp2_01021	COG0503	1.8e-39	Catalyzes a salvage reaction resulting in the formation of AMP, that is energically less costly than de novo synthesis (By similarity)	F	Nucleotide transport and metabolism
mp2_01026	COG0154	1.6e-129	Allows the formation of correctly charged Gln-tRNA(Gln) through the transamidation of misacylated Glu-tRNA(Gln) in organisms which lack glutaminyl-tRNA synthetase. The reaction takes place in the presence of glutamine and ATP through an activated gamma-phospho-Glu-tRNA(Gln) (By similarity)	J	Translation, ribosomal structure and biogenesis
mp2_01027	COG0064	9.1e-176	Allows the formation of correctly charged Asn-tRNA(Asn) or Gln-tRNA(Gln) through the transamidation of misacylated Asp- tRNA(Asn) or Glu-tRNA(Gln) in organisms which lack either or both of asparaginyl-tRNA or glutaminyl-tRNA synthetases. The reaction takes place in the presence of glutamine and ATP through an activated phospho-Asp-tRNA(Asn) or phospho-Glu-tRNA(Gln) (By similarity)	J	Translation, ribosomal structure and biogenesis
mp2_01024	COG4851	8.9e-138	Sex pheromone	S	Function unknown
mp2_01025	COG0721	8.2e-33	Allows the formation of correctly charged Asn-tRNA(Asn) or Gln-tRNA(Gln) through the transamidation of misacylated Asp- tRNA(Asn) or Glu-tRNA(Gln) in organisms which lack either or both of asparaginyl-tRNA or glutaminyl-tRNA synthetases. The reaction takes place in the presence of glutamine and ATP through an activated phospho-Asp-tRNA(Asn) or phospho-Glu-tRNA(Gln) (By similarity)	J	Translation, ribosomal structure and biogenesis
mp2_00649	COG0668	1.5e-40	Mechanosensitive ion channel	M	Cell wall/membrane/envelope biogenesis
mp2_00648	COG0765	2.2e-81	amino acid AbC transporter	E	Amino acid transport and metabolism
mp2_00645	ENOG4111X46	2.6e-35	transposase	L	Replication, recombination and repair
mp2_00644	ENOG410XPIG	9.4e-57	Integrase core domain	L	Replication, recombination and repair
mp2_00647	COG1126	1.1e-113	ABC transporter, (ATP-binding protein)	E	Amino acid transport and metabolism
mp2_00646	ENOG410XSV7	6.8e-81	Extracellular solute-binding protein family 3	E	Amino acid transport and metabolism
mp2_00641	ENOG410YUCG	3.1e-54	Transcriptional regulator	K	Transcription
mp2_00640	COG0281	9.9e-215	malic enzyme	C	Energy production and conversion
mp2_00643	ENOG410ZV6X	7.1e-19	MucBP domain	S	Function unknown
mp2_00642	ENOG410ZV6X	3.7e-32	MucBP domain	S	Function unknown
mp2_00489	ENOG410ZVZX	8.7e-05	NA	G	Carbohydrate transport and metabolism
mp2_00488	COG1376	1.4e-33	ErfK ybiS ycfS ynhG family protein	S	Function unknown
mp2_00481	COG1301	3.5e-117	sodium dicarboxylate symporter	C	Energy production and conversion
mp2_00480	COG0253	0	Catalyzes the stereoinversion of LL-2,6- diaminoheptanedioate (L,L-DAP) to meso-diaminoheptanedioate (meso- DAP), a precursor of L-lysine and an essential component of the bacterial peptidoglycan (By similarity)	E	Amino acid transport and metabolism
mp2_00487	ENOG410ZDMC	0.00062	NA	S	Function unknown
mp2_00486	ENOG4111PF0	5.1e-58	acetyltransferase	S	Function unknown
mp2_00485	COG0183	1.1e-127	acetyl-coa acetyltransferase	I	Lipid transport and metabolism
mp2_00799	ENOG411285J	3e-36	NA	S	Function unknown
mp2_00798	COG3428	3.2e-72	membrane-flanked domain protein	S	Function unknown
mp2_00797	COG3402	2.1e-39	membrane-flanked domain protein	S	Function unknown
mp2_00796	COG0350	3.1e-06	Involved in the cellular defense against the biological effects of O6-methylguanine (O6-MeG) in DNA. Repairs alkylated guanine in DNA by stoichiometrically transferring the alkyl group at the O-6 position to a cysteine residue in the enzyme. This is a suicide reaction the enzyme is irreversibly inactivated (By similarity)	L	Replication, recombination and repair
mp2_00795	COG0791	3e-37	NLP P60 protein	M	Cell wall/membrane/envelope biogenesis
mp2_00794	COG2323	5.6e-92	Membrane	S	Function unknown
mp2_00793	COG3560	3.4e-90	Nitroreductase	S	Function unknown
mp2_00792	COG2076	1.7e-32	Multidrug Resistance protein	P	Inorganic ion transport and metabolism
mp2_00791	COG1272	2.8e-27	Channel protein (Hemolysin III family	S	Function unknown
mp2_00790	ENOG4111U6T	4.8e-42	lysm domain protein	S	Function unknown
mp2_00865	COG1135	8.9e-135	Part of the ABC transporter complex MetNIQ involved in methionine import. Responsible for energy coupling to the transport system (By similarity)	P	Inorganic ion transport and metabolism
mp2_00864	COG1464	7.8e-104	(Lipo)protein	P	Inorganic ion transport and metabolism
mp2_00867	COG0624	1.9e-44	succinyl-diaminopimelate desuccinylase activity	E	Amino acid transport and metabolism
mp2_00866	COG2011	4.3e-101	ABC transporter (permease)	P	Inorganic ion transport and metabolism
mp2_00861	COG5438	3.2e-58	YibE F family protein	S	Function unknown
mp2_00860	COG5438	1.3e-83	YibE F family protein	S	Function unknown
mp2_00863	ENOG4111FZ9	0.00042	NA	S	Function unknown
mp2_00862	COG1506	3.8e-78	peptidase s9 prolyl oligopeptidase active site domain protein	E	Amino acid transport and metabolism
mp2_00869	COG1814	7e-55	integral membrane protein	S	Function unknown
mp2_00868	COG1814	1.9e-55	integral membrane protein	S	Function unknown
mp2_01397	COG1534	7.4e-31	Rna-binding protein	J	Translation, ribosomal structure and biogenesis
mp2_00133	COG1705	1.5e-37	flagellar rod assembly protein muramidase flgj	NU	Cell motility,Intracellular trafficking, secretion, and vesicular transport
mp2_00132	COG1134	7.4e-124	(ABC) transporter	GM	Carbohydrate transport and metabolism,Cell wall/membrane/envelope biogenesis
mp2_00131	ENOG4111UDD	2.2e-52	NA	S	Function unknown
mp2_00130	ENOG410Y9WB	0.00051	HTH_LUXR	T	Signal transduction mechanisms
mp2_00137	COG4856	6.9e-78	ybbr family	S	Function unknown
mp2_00136	COG1109	9.1e-102	Catalyzes the conversion of glucosamine-6-phosphate to glucosamine-1-phosphate (By similarity)	G	Carbohydrate transport and metabolism
mp2_00135	COG0449	6.3e-189	Catalyzes the first step in hexosamine metabolism, converting fructose-6P into glucosamine-6P using glutamine as a nitrogen source (By similarity)	M	Cell wall/membrane/envelope biogenesis
mp2_00139	COG4330	2.1e-45	Membrane	S	Function unknown
mp2_00138	COG1624	3.4e-99	TIGR00159 family	S	Function unknown
mp2_01523	COG1956	1e-57	gaf domain protein	T	Signal transduction mechanisms
mp2_01522	COG4477	9.7e-150	modulates the frequency and position of FtsZ ring formation. Inhibits FtsZ ring formation at polar sites. Interacts either with FtsZ or with one of its binding partners to promote depolymerization (By similarity)	D	Cell cycle control, cell division, chromosome partitioning
mp2_01521	COG1104	3.1e-138	cysteine desulfurase	E	Amino acid transport and metabolism
mp2_01520	COG0301	7.7e-157	Catalyzes the ATP-dependent transfer of a sulfur to tRNA to produce 4-thiouridine in position 8 of tRNAs, which functions as a near-UV photosensor. Also catalyzes the transfer of sulfur to the sulfur carrier protein ThiS, forming ThiS-thiocarboxylate. This is a step in the synthesis of thiazole, in the thiamine biosynthesis pathway. The sulfur is donated as persulfide by IscS (By similarity)	H	Coenzyme transport and metabolism
mp2_01527	ENOG410ZCPE	6.5e-17	NA	S	Function unknown
mp2_01526	COG2256	2.1e-175	Recombination factor protein RarA	L	Replication, recombination and repair
mp2_01525	COG5506	3.7e-40	Protein of unknown function (DUF1694)	S	Function unknown
mp2_01524	COG0522	2.3e-36	One of the primary rRNA binding proteins, it binds directly to 16S rRNA where it nucleates assembly of the body of the 30S subunit (By similarity)	J	Translation, ribosomal structure and biogenesis
mp2_01529	ENOG4111NXV	2.8e-11	transcriptional regulator	K	Transcription
mp2_01528	ENOG411278V	2.4e-28	universal stress protein	S	Function unknown
mp2_00006	COG0772	9.7e-109	Cell Division Protein	D	Cell cycle control, cell division, chromosome partitioning
mp2_00005	COG1135	4e-139	Part of the ABC transporter complex MetNIQ involved in methionine import. Responsible for energy coupling to the transport system (By similarity)	P	Inorganic ion transport and metabolism
mp2_00004	COG2011	7.2e-99	ABC transporter (permease)	P	Inorganic ion transport and metabolism
mp2_00003	COG1464	9.4e-93	(Lipo)protein	P	Inorganic ion transport and metabolism
mp2_00002	ENOG410XT28	1.4e-33	ABC transporter	P	Inorganic ion transport and metabolism
mp2_00009	COG0766	3.4e-198	Cell wall formation. Adds enolpyruvyl to UDP-N- acetylglucosamine (By similarity)	M	Cell wall/membrane/envelope biogenesis
mp2_00008	COG1077	3.5e-153	Rod shape-determining protein, MreB	D	Cell cycle control, cell division, chromosome partitioning
mp2_01237	COG0542	2.2e-257	ATP-dependent CLP protease ATP-binding subunit	O	Posttranslational modification, protein turnover, chaperones
mp2_01236	COG2195	7.9e-98	Cleaves the N-terminal amino acid of tripeptides (By similarity)	E	Amino acid transport and metabolism
mp2_01235	COG0327	7.8e-79	dinuclear metal center protein, YbgI	S	Function unknown
mp2_01234	COG2384	1.1e-73	sam-dependent methyltransferase	S	Function unknown
mp2_01233	COG0568	1.8e-168	Sigma factors are initiation factors that promote the attachment of RNA polymerase to specific initiation sites and are then released (By similarity)	K	Transcription
mp2_01232	COG0358	2.3e-131	DNA primase activity	L	Replication, recombination and repair
mp2_01231	COG0751	3.5e-243	Glycyl-tRNA synthetase beta subunit	J	Translation, ribosomal structure and biogenesis
mp2_01230	COG0752	1.8e-184	glycyl-tRNA synthetase, alpha subunit	J	Translation, ribosomal structure and biogenesis
mp2_01239	COG0587	0	DNA polymerase III (alpha subunit)	L	Replication, recombination and repair
mp2_01238	ENOG410Y55Y	6.3e-25	Protein of unknown function (DUF2929)	S	Function unknown
mp2_00319	ENOG410ZINK	6.3e-139	NA	S	Function unknown
mp2_00313	COG0357	4.4e-69	Specifically methylates the N7 position of a guanine in 16S rRNA (By similarity)	M	Cell wall/membrane/envelope biogenesis
mp2_00312	COG1192	5.4e-80	cobyrinic Acid a,c-diamide synthase	D	Cell cycle control, cell division, chromosome partitioning
mp2_00311	COG1475	1.4e-70	parb-like partition protein	K	Transcription
mp2_00310	COG4481	4.8e-34	protein, conserved in bacteria	S	Function unknown
mp2_00317	ENOG410YRXR	2.7e-47	NA	S	Function unknown
mp2_00316	COG1015	1.2e-44	Phosphotransfer between the C1 and C5 carbon atoms of pentose (By similarity)	G	Carbohydrate transport and metabolism
mp2_00315	COG1972	6.2e-105	)-nucleoside	F	Nucleotide transport and metabolism
mp2_00314	COG2252	7e-116	Xanthine uracil vitamin C permease	S	Function unknown
mp2_01309	COG1189	2.6e-108	hemolysin a	J	Translation, ribosomal structure and biogenesis
mp2_01308	COG0142	6e-57	synthase	H	Coenzyme transport and metabolism
mp2_01303	COG1302	2e-38	alkaline shock protein	S	Function unknown
mp2_01302	COG0231	7.8e-45	Involved in peptide bond synthesis. Stimulates efficient translation and peptide-bond synthesis on native or reconstituted 70S ribosomes in vitro. Probably functions indirectly by altering the affinity of the ribosome for aminoacyl-tRNA, thus increasing their reactivity as acceptors for peptidyl transferase (By similarity)	J	Translation, ribosomal structure and biogenesis
mp2_01301	COG0211	4.3e-39	50S ribosomal protein l27	J	Translation, ribosomal structure and biogenesis
mp2_01300	COG2868	6.5e-33	(ribosomal) protein	J	Translation, ribosomal structure and biogenesis
mp2_01307	COG1722	9.5e-22	Bidirectionally degrades single-stranded DNA into large acid-insoluble oligonucleotides, which are then degraded further into small acid-soluble oligonucleotides (By similarity)	L	Replication, recombination and repair
mp2_01306	COG1570	1.6e-162	Bidirectionally degrades single-stranded DNA into large acid-insoluble oligonucleotides, which are then degraded further into small acid-soluble oligonucleotides (By similarity)	L	Replication, recombination and repair
mp2_01305	COG0190	2.3e-99	Catalyzes the oxidation of 5,10- methylenetetrahydrofolate to 5,10-methenyltetrahydrofolate and then the hydrolysis of 5,10-methenyltetrahydrofolate to 10- formyltetrahydrofolate (By similarity)	H	Coenzyme transport and metabolism
mp2_01304	COG0781	4e-47	DNA-dependent transcription, termination	K	Transcription
mp2_00269	COG1207	3.2e-179	Catalyzes the last two sequential reactions in the de novo biosynthetic pathway for UDP-N-acetylglucosamine (UDP- GlcNAc). The C-terminal domain catalyzes the transfer of acetyl group from acetyl coenzyme A to glucosamine-1-phosphate (GlcN-1-P) to produce N-acetylglucosamine-1-phosphate (GlcNAc-1-P), which is converted into UDP-GlcNAc by the transfer of uridine 5- monophosphate (from uridine 5-tr…	M	Cell wall/membrane/envelope biogenesis
mp2_00268	COG0462	4.4e-131	Phosphoribosyl pyrophosphate synthase	F	Nucleotide transport and metabolism
mp2_00267	ENOG41106UV	0.00023	Solute carrier family 46, member 2	S	Function unknown
mp2_00266	ENOG4111FKE	6.7e-69	Sucrose-6F-phosphate phosphohydrolase	S	Function unknown
mp2_00265	COG1078	2e-107	Metal Dependent Phosphohydrolase	S	Function unknown
mp2_00264	ENOG4111UYP	4e-42	Domain of unknown function (DUF1934)	S	Function unknown
mp2_00263	COG3343	1e-63	Participates in both the initiation and recycling phases of transcription. In the presence of the delta subunit, RNAP displays an increased specificity of transcription, a decreased affinity for nucleic acids, and an increased efficiency of RNA synthesis because of enhanced recycling (By similarity)	K	Transcription
mp2_00262	COG0504	3.9e-243	Catalyzes the ATP-dependent amination of UTP to CTP with either L-glutamine or ammonia as the source of nitrogen (By similarity)	F	Nucleotide transport and metabolism
mp2_00261	COG0766	4.5e-166	Cell wall formation. Adds enolpyruvyl to UDP-N- acetylglucosamine (By similarity)	M	Cell wall/membrane/envelope biogenesis
mp2_00260	COG0254	4.6e-33	50S ribosomal protein L3-1	J	Translation, ribosomal structure and biogenesis
mp2_01019	ENOG410YZZJ	1.3e-29	NA	S	Function unknown
mp2_01018	COG4684	2.3e-55	membrAne	S	Function unknown
mp2_01017	COG0103	9.4e-53	30S ribosomal protein S9	J	Translation, ribosomal structure and biogenesis
mp2_01016	COG0102	5.6e-48	This protein is one of the early assembly proteins of the 50S ribosomal subunit, although it is not seen to bind rRNA by itself. It is important during the early stages of 50S assembly (By similarity)	J	Translation, ribosomal structure and biogenesis
mp2_01015	COG0101	2.2e-73	Formation of pseudouridine at positions 38, 39 and 40 in the anticodon stem and loop of transfer RNAs (By similarity)	J	Translation, ribosomal structure and biogenesis
mp2_01014	ENOG4111PXR	2e-52	Cobalt transport protein	P	Inorganic ion transport and metabolism
mp2_01013	COG1122	2.9e-94	ATPase activity	P	Inorganic ion transport and metabolism
mp2_01012	COG1122	3e-94	ATPase activity	P	Inorganic ion transport and metabolism
mp2_01011	COG0203	5.7e-56	50S ribosomal protein l17	J	Translation, ribosomal structure and biogenesis
mp2_01010	COG0202	2.3e-62	DNA-dependent RNA polymerase catalyzes the transcription of DNA into RNA using the four ribonucleoside triphosphates as substrates (By similarity)	K	Transcription
mp2_00658	COG2210	4.4e-81	pyridine nucleotide-disulfide oxidoreductase	S	Function unknown
mp2_00659	ENOG41120E9	1.1e-43	Bacterial regulatory proteins, tetR family	K	Transcription
mp2_00657	ENOG410YKTK	1.3e-39	acyl-CoA thioesterase	S	Function unknown
mp2_00652	COG1136	5.4e-169	(ABC) transporter	V	Defense mechanisms
mp2_00653	COG3757	1.2e-30	hydrolase, family 25	M	Cell wall/membrane/envelope biogenesis
mp2_00650	COG0668	1.2e-40	Mechanosensitive ion channel	M	Cell wall/membrane/envelope biogenesis
mp2_00651	ENOG4111RN1	1.7e-31	Transcriptional regulator	K	Transcription
mp2_00498	ENOG410ZVFA	2.5e-109	Major Facilitator superfamily	G	Carbohydrate transport and metabolism
mp2_00499	ENOG410XQT2	3e-113	Membrane transport protein	S	Function unknown
mp2_00494	COG2145	2.2e-75	4-methyl-5-beta-hydroxyethylthiazole kinase	H	Coenzyme transport and metabolism
mp2_00496	COG0637	1.5e-50	HAD-superfamily hydrolase subfamily IA variant 3	S	Function unknown
mp2_00497	COG1554	4.6e-181	hydrolase family 65	G	Carbohydrate transport and metabolism
mp2_00490	ENOG410Y44U	2.7e-42	Lpxtg-motif cell wall anchor domain protein	S	Function unknown
mp2_00491	COG0819	1.2e-45	Transcriptional activator, tena	K	Transcription
mp2_00492	COG0351	4.9e-103	phosphomethylpyrimidine kinase	H	Coenzyme transport and metabolism
mp2_00493	COG0352	1.7e-54	Condenses 4-methyl-5-(beta-hydroxyethyl)thiazole monophosphate (THZ-P) and 2-methyl-4-amino-5-hydroxymethyl pyrimidine pyrophosphate (HMP-PP) to form thiamine monophosphate (TMP) (By similarity)	H	Coenzyme transport and metabolism
mp2_00780	ENOG41120BU	4.9e-85	NA	S	Function unknown
mp2_00781	ENOG410XPIG	1.9e-57	Integrase core domain	L	Replication, recombination and repair
mp2_00782	ENOG4111X46	2.5e-34	transposase	L	Replication, recombination and repair
mp2_00783	COG0531	3.9e-147	amino acid	E	Amino acid transport and metabolism
mp2_00784	COG1113	3.5e-159	amino acid	E	Amino acid transport and metabolism
mp2_00785	COG1113	3.7e-158	amino acid	E	Amino acid transport and metabolism
mp2_00786	ENOG4111TPH	3e-50	Transcriptional regulator	K	Transcription
mp2_00787	ENOG410Z7KW	1.7e-14	NA	S	Function unknown
mp2_00788	ENOG410Z7KW	1.7e-36	NA	S	Function unknown
mp2_00789	ENOG410XR6F	7.1e-84	(ABC) transporter	S	Function unknown
mp2_00876	COG0527	9.3e-102	Aspartokinase	E	Amino acid transport and metabolism
mp2_00877	COG0019	1.1e-104	Specifically catalyzes the decarboxylation of meso- diaminopimelate (meso-DAP) to L-lysine (By similarity)	E	Amino acid transport and metabolism
mp2_00874	COG4357	7.7e-36	zinc finger	S	Function unknown
mp2_00875	COG0253	3e-59	Catalyzes the stereoinversion of LL-2,6- diaminoheptanedioate (L,L-DAP) to meso-diaminoheptanedioate (meso- DAP), a precursor of L-lysine and an essential component of the bacterial peptidoglycan (By similarity)	E	Amino acid transport and metabolism
mp2_00872	ENOG410XNN3	1.8e-116	drug resistance transporter emrb qaca subfamily	P	Inorganic ion transport and metabolism
mp2_00873	ENOG410Y7VU	9.1e-07	NA	S	Function unknown
mp2_00870	COG0436	5.2e-82	aminotransferase	E	Amino acid transport and metabolism
mp2_00871	COG1892	1.8e-166	Catalyzes the irreversible beta-carboxylation of phosphoenolpyruvate (PEP) to form oxaloacetate (OAA), a four- carbon dicarboxylic acid source for the tricarboxylic acid cycle (By similarity)	C	Energy production and conversion
mp2_00878	COG2171	2.5e-51	Catalyzes the conversion of the cyclic tetrahydrodipicolinate (THDP) into the acyclic N-succinyl-L-2- amino-6-oxopimelate using succinyl-CoA (By similarity)	E	Amino acid transport and metabolism
mp2_00879	COG1473	9.6e-96	amidohydrolase	E	Amino acid transport and metabolism
mp2_00124	COG0598	1e-30	magnesium and cobalt transport protein CorA	P	Inorganic ion transport and metabolism
mp2_00125	ENOG410ZVDC	7.1e-144	Major Facilitator	G	Carbohydrate transport and metabolism
mp2_00126	ENOG410XNUN	3.2e-93	Short-chain dehydrogenase reductase Sdr	S	Function unknown
mp2_00127	COG1055	3.5e-37	arsenical pump membrane protein	P	Inorganic ion transport and metabolism
mp2_00120	ENOG4111X46	2.9e-37	transposase	L	Replication, recombination and repair
mp2_00122	ENOG41123WC	4.3e-49	Membrane	S	Function unknown
mp2_00123	COG4975	7.7e-88	uptake protein	G	Carbohydrate transport and metabolism
mp2_00128	COG3158	1.1e-194	Transport of potassium into the cell (By similarity)	P	Inorganic ion transport and metabolism
mp2_00129	COG1167	1.3e-115	Transcriptional regulator, gntR family	K	Transcription
mp2_01534	COG1725	2.2e-29	Transcriptional regulator, GntR family	K	Transcription
mp2_01535	COG1464	9.4e-93	(Lipo)protein	P	Inorganic ion transport and metabolism
mp2_01536	COG2011	7.2e-99	ABC transporter (permease)	P	Inorganic ion transport and metabolism
mp2_01537	COG1135	4e-139	Part of the ABC transporter complex MetNIQ involved in methionine import. Responsible for energy coupling to the transport system (By similarity)	P	Inorganic ion transport and metabolism
mp2_01530	COG2818	3.1e-60	DNA-3-methyladenine glycosylase activity	L	Replication, recombination and repair
mp2_01531	COG1181	1.1e-84	cell wall formation (By similarity)	M	Cell wall/membrane/envelope biogenesis
mp2_01532	ENOG410ZBJ2	3.1e-18	Transporter Permease Protein	S	Function unknown
mp2_01533	ENOG410XT28	3e-55	ABC transporter	P	Inorganic ion transport and metabolism
mp2_01538	COG0772	9.7e-109	Cell Division Protein	D	Cell cycle control, cell division, chromosome partitioning
mp2_00018	COG0356	1.5e-51	it plays a direct role in the translocation of protons across the membrane (By similarity)	C	Energy production and conversion
mp2_00019	COG0035	5.9e-68	Catalyzes the conversion of uracil and 5-phospho-alpha- D-ribose 1-diphosphate (PRPP) to UMP and diphosphate (By similarity)	F	Nucleotide transport and metabolism
mp2_00010	ENOG410Y094	1.1e-18	Protein of unknown function (DUF1146)	S	Function unknown
mp2_00011	ENOG4111TPV	2.1e-30	Produces ATP from ADP in the presence of a proton gradient across the membrane (By similarity)	S	Function unknown
mp2_00012	COG0055	9.1e-264	Produces ATP from ADP in the presence of a proton gradient across the membrane. The catalytic sites are hosted primarily by the beta subunits (By similarity)	C	Energy production and conversion
mp2_00013	COG0224	3.8e-71	Produces ATP from ADP in the presence of a proton gradient across the membrane. The gamma chain is believed to be important in regulating ATPase activity and the flow of protons through the CF(0) complex (By similarity)	C	Energy production and conversion
mp2_00014	COG0056	7.8e-229	Produces ATP from ADP in the presence of a proton gradient across the membrane. The alpha chain is a regulatory subunit (By similarity)	C	Energy production and conversion
mp2_00015	COG0712	6.1e-34	F(1)F(0) ATP synthase produces ATP from ADP in the presence of a proton or sodium gradient. F-type ATPases consist of two structural domains, F(1) containing the extramembraneous catalytic core and F(0) containing the membrane proton channel, linked together by a central stalk and a peripheral stalk. During catalysis, ATP synthesis in the catalytic domain of F(1) is coupled via a rotary mechanism…	C	Energy production and conversion
mp2_00016	COG0711	7.5e-53	F(1)F(0) ATP synthase produces ATP from ADP in the presence of a proton or sodium gradient. F-type ATPases consist of two structural domains, F(1) containing the extramembraneous catalytic core and F(0) containing the membrane proton channel, linked together by a central stalk and a peripheral stalk. During catalysis, ATP synthesis in the catalytic domain of F(1) is coupled via a rotary mechanism…	C	Energy production and conversion
mp2_00017	ENOG410ZXQ9	4.6e-29	ATP synthase F0 C subunit	C	Energy production and conversion
mp2_01228	COG1159	1.6e-118	An essential GTPase that binds both GDP and GTP, with rapid nucleotide exchange. Plays a role in 16S rRNA processing and 30S ribosomal subunit biogenesis and possibly also in cell cycle regulation and energy metabolism (By similarity)	S	Function unknown
mp2_01229	COG1381	1.4e-36	Involved in DNA repair and RecF pathway recombination (By similarity)	L	Replication, recombination and repair
mp2_01220	COG1887	7.6e-86	CDP-glycerol poly(glycerophosphate) glycerophosphotransferase	M	Cell wall/membrane/envelope biogenesis
mp2_01221	COG0648	1.8e-90	Endonuclease IV plays a role in DNA repair. It cleaves phosphodiester bonds at apurinic or apyrimidinic sites (AP sites) to produce new 5'-ends that are base-free deoxyribose 5-phosphate residues. It preferentially attacks modified AP sites created by bleomycin and neocarzinostatin (By similarity)	L	Replication, recombination and repair
mp2_01222	COG1806	4.6e-104	Bifunctional serine threonine kinase and phosphorylase involved in the regulation of the pyruvate, phosphate dikinase (PPDK) by catalyzing its phosphorylation dephosphorylation (By similarity)	S	Function unknown
mp2_01223	COG0828	4.1e-29	30S ribosomal protein S21	J	Translation, ribosomal structure and biogenesis
mp2_01224	COG1610	4.2e-51	gatB Yqey	S	Function unknown
mp2_01225	COG1702	1.6e-129	Phoh family	T	Signal transduction mechanisms
mp2_01226	COG0319	3.3e-49	metalloendopeptidase activity	S	Function unknown
mp2_01227	COG0818	4.2e-42	Diacylglycerol kinase	M	Cell wall/membrane/envelope biogenesis
mp2_00308	COG4858	3.5e-62	integral membrane protein	S	Function unknown
mp2_00309	COG0012	1.9e-138	gtp-binding protein	J	Translation, ribosomal structure and biogenesis
mp2_00304	COG1686	1.6e-79	Carboxypeptidase	M	Cell wall/membrane/envelope biogenesis
mp2_00305	COG0642	1.3e-76	Histidine kinase	T	Signal transduction mechanisms
mp2_00306	ENOG4111FPD	4.2e-77	Two component transcriptional regulator, winged helix family	T	Signal transduction mechanisms
mp2_00307	COG0516	6.6e-163	Catalyzes the conversion of inosine 5'-phosphate (IMP) to xanthosine 5'-phosphate (XMP), the first committed and rate- limiting step in the de novo synthesis of guanine nucleotides, and therefore plays an important role in the regulation of cell growth (By similarity)	F	Nucleotide transport and metabolism
mp2_00300	COG3641	1.1e-89	Membrane	S	Function unknown
mp2_00301	COG3641	3.1e-88	Membrane	S	Function unknown
mp2_00302	ENOG4111WV0	3.6e-45	Branched-chain amino acid	S	Function unknown
mp2_00303	COG1296	7.2e-47	AzlC Family	E	Amino acid transport and metabolism
mp2_01318	COG2815	1.2e-156	Serine Threonine protein kinase	T	Signal transduction mechanisms
mp2_01319	COG1162	3e-101	May play a role in 30S ribosomal subunit biogenesis. Unusual circulary permuted GTPase that catalyzes rapid hydrolysis of GTP with a slow catalytic turnover (By similarity)	S	Function unknown
mp2_01314	COG1198	8.3e-236	Primosomal protein n'	L	Replication, recombination and repair
mp2_01315	COG0223	1.9e-82	Modifies the free amino group of the aminoacyl moiety of methionyl-tRNA(fMet). The formyl group appears to play a dual role in the initiator identity of N-formylmethionyl-tRNA by (I) promoting its recognition by IF2 and (II) impairing its binding to EFTu-GTP (By similarity)	J	Translation, ribosomal structure and biogenesis
mp2_01316	COG0144	1.8e-71	nOP2 Sun	J	Translation, ribosomal structure and biogenesis
mp2_01317	ENOG4111RK1	2.6e-28	protein serine threonine phosphatase	T	Signal transduction mechanisms
mp2_01310	COG0497	5.6e-198	May be involved in recombinational repair of damaged DNA (By similarity)	L	Replication, recombination and repair
mp2_01311	COG0194	8.7e-56	Essential for recycling GMP and indirectly, cGMP (By similarity)	F	Nucleotide transport and metabolism
mp2_01312	ENOG410ZZC3	8.8e-21	Promotes RNA polymerase assembly. Latches the N- and C- terminal regions of the beta' subunit thereby facilitating its interaction with the beta and alpha subunits (By similarity)	K	Transcription
mp2_01313	COG0452	1.4e-104	Phosphopantothenoylcysteine decarboxylase	H	Coenzyme transport and metabolism
mp2_00270	COG0503	6.9e-44	Catalyzes a salvage reaction resulting in the formation of AMP, that is energically less costly than de novo synthesis (By similarity)	F	Nucleotide transport and metabolism
mp2_00271	COG1947	6.2e-78	Catalyzes the phosphorylation of the position 2 hydroxy group of 4-diphosphocytidyl-2C-methyl-D-erythritol (By similarity)	I	Lipid transport and metabolism
mp2_00272	COG4466	8.7e-31	Veg protein	S	Function unknown
mp2_00273	COG0030	1.6e-89	Specifically dimethylates two adjacent adenosines (A1518 and A1519) in the loop of a conserved hairpin near the 3'-end of 16S rRNA in the 30S particle. May play a critical role in biogenesis of 30S subunits (By similarity)	J	Translation, ribosomal structure and biogenesis
mp2_00274	COG1658	7.7e-53	ribonuclease M5 activity	L	Replication, recombination and repair
mp2_00275	COG0084	1.4e-72	tatd family	L	Replication, recombination and repair
mp2_00276	COG0073	3.4e-215	Is required not only for elongation of protein synthesis but also for the initiation of all mRNA translation through initiator tRNA(fMet) aminoacylation (By similarity)	J	Translation, ribosomal structure and biogenesis
mp2_00277	COG1801	1e-64	conserved protein	S	Function unknown
mp2_00278	COG0846	3.9e-57	NAD-dependent protein deacetylase which modulates the activities of several enzymes which are inactive in their acetylated form	K	Transcription
mp2_00279	ENOG410YEQR	1.3e-135	NA	S	Function unknown
mp2_01000	COG0256	5.5e-32	This is one of the proteins that binds and probably mediates the attachment of the 5S RNA into the large ribosomal subunit, where it forms part of the central protuberance (By similarity)	J	Translation, ribosomal structure and biogenesis
mp2_01001	COG0098	5e-47	Located at the back of the 30S subunit body where it stabilizes the conformation of the head with respect to the body (By similarity)	J	Translation, ribosomal structure and biogenesis
mp2_01002	ENOG410XUY8	1.8e-19	50S ribosomal protein L30	J	Translation, ribosomal structure and biogenesis
mp2_01003	COG0200	3.6e-44	Binds to the 23S rRNA (By similarity)	J	Translation, ribosomal structure and biogenesis
mp2_01004	COG0201	7.7e-85	The central subunit of the protein translocation channel SecYEG. Consists of two halves formed by TMs 1-5 and 6-10. These two domains form a lateral gate at the front which open onto the bilayer between TMs 2 and 7, and are clamped together by SecE at the back. The channel is closed by both a pore ring composed of hydrophobic SecY resides and a short helix (helix 2A) on the extracellular side of …	U	Intracellular trafficking, secretion, and vesicular transport
mp2_01005	COG0563	1.3e-79	Catalyzes the reversible transfer of the terminal phosphate group between ATP and AMP. Plays an important role in cellular energy homeostasis and in adenine nucleotide metabolism (By similarity)	F	Nucleotide transport and metabolism
mp2_01006	COG0361	2.4e-26	however, it seems to stimulate more or less all the activities of the other two initiation factors, IF-2 and IF-3 (By similarity)	J	Translation, ribosomal structure and biogenesis
mp2_01007	ENOG410XUYG	1.4e-24	50S ribosomal protein L36, chloroplastic	J	Translation, ribosomal structure and biogenesis
mp2_01008	COG0099	8.7e-35	Located at the top of the head of the 30S subunit, it contacts several helices of the 16S rRNA. In the 70S ribosome it contacts the 23S rRNA (bridge B1a) and protein L5 of the 50S subunit (bridge B1b), connecting the 2 subunits	J	Translation, ribosomal structure and biogenesis
mp2_01009	COG0100	3.9e-38	Located on the platform of the 30S subunit, it bridges several disparate RNA helices of the 16S rRNA. Forms part of the Shine-Dalgarno cleft in the 70S ribosome (By similarity)	J	Translation, ribosomal structure and biogenesis
mp2_00663	COG0803	1.4e-71	periplasmic solute binding protein	P	Inorganic ion transport and metabolism
mp2_00662	ENOG4110ZS0	6.2e-05	NA	S	Function unknown
mp2_00661	COG1136	1.7e-77	(ABC) transporter	V	Defense mechanisms
mp2_00660	ENOG41101I1	2.9e-35	FtsX-like permease family	V	Defense mechanisms
mp2_00667	ENOG410YMX3	3.7e-36	NA	S	Function unknown
mp2_00666	COG0584	2.6e-38	glycerophosphoryl diester phosphodiesterase	C	Energy production and conversion
mp2_00665	ENOG410Z29D	4.3e-25	NA	S	Function unknown
mp2_00664	ENOG410XUQV	4.2e-21	Transcriptional regulator, arsR family	K	Transcription
mp2_00669	ENOG410XPIG	1.9e-57	Integrase core domain	L	Replication, recombination and repair
mp2_00668	ENOG4111X46	2.5e-34	transposase	L	Replication, recombination and repair
mp2_00461	ENOG4111TM7	1.8e-34	Gtra family	S	Function unknown
mp2_00460	ENOG4111FPD	4e-80	Two component transcriptional regulator, winged helix family	T	Signal transduction mechanisms
mp2_00463	ENOG410XNQN	4.8e-86	Glycosyl transferase family 2	M	Cell wall/membrane/envelope biogenesis
mp2_00462	ENOG410Z8IR	9.9e-83	NA	M	Cell wall/membrane/envelope biogenesis
mp2_00465	COG1787	5.7e-46	restriction endonuclease	V	Defense mechanisms
mp2_00464	COG5549	7.4e-31	peptidase m10a and m12b matrixin and adamalysin	O	Posttranslational modification, protein turnover, chaperones
mp2_00467	COG4536	6.4e-74	flavin adenine dinucleotide binding	P	Inorganic ion transport and metabolism
mp2_00466	ENOG4111GKR	8.4e-48	NA	S	Function unknown
mp2_00469	ENOG410ZVV9	6.9e-139	Major Facilitator	G	Carbohydrate transport and metabolism
mp2_00468	COG1780	4.5e-41	Probably involved in ribonucleotide reductase function (By similarity)	F	Nucleotide transport and metabolism
mp2_00849	COG0328	4.8e-52	ribonuclease H activity	L	Replication, recombination and repair
mp2_00848	ENOG410Z5Y8	2.5e-26	NA	S	Function unknown
mp2_00843	COG2249	7.7e-42	(NAD(P)H dehydrogenase) (Quinone)	S	Function unknown
mp2_00842	ENOG410XPVU	3.9e-60	Bacterial extracellular solute-binding proteins, family 5 Middle	S	Function unknown
mp2_00841	COG1173	1.5e-75	Binding-protein-dependent transport systems inner membrane component	P	Inorganic ion transport and metabolism
mp2_00840	COG0601	2.2e-85	Binding-protein-dependent transport systems inner membrane component	P	Inorganic ion transport and metabolism
mp2_00847	COG0351	7.7e-88	phosphomethylpyrimidine kinase	H	Coenzyme transport and metabolism
mp2_00846	ENOG410XPIG	5.7e-50	Integrase core domain	L	Replication, recombination and repair
mp2_00845	ENOG4111X46	2.9e-37	transposase	L	Replication, recombination and repair
mp2_00844	ENOG410ZR1M	9.1e-20	NA	S	Function unknown
mp2_00689	COG0308	5.5e-191	aminopeptidase	E	Amino acid transport and metabolism
mp2_00688	ENOG410YS3M	1.8e-22	Tubulin folding cofactor E	S	Function unknown
mp2_00681	COG2837	5.8e-59	peroxidase	P	Inorganic ion transport and metabolism
mp2_00680	COG0753	1.3e-195	Catalase	P	Inorganic ion transport and metabolism
mp2_00683	COG1476	5.9e-27	Transcriptional regulator	K	Transcription
mp2_00682	COG1576	5.7e-62	rRNA processing	S	Function unknown
mp2_00685	ENOG410XZ7F	1.1e-18	Protein of unknown function (DUF3278)	S	Function unknown
mp2_00684	ENOG410XZ7F	4.2e-21	Protein of unknown function (DUF3278)	S	Function unknown
mp2_00687	ENOG410ZM8A	1.6e-34	Putative cell wall binding repeat	G	Carbohydrate transport and metabolism
mp2_00686	ENOG4111ICQ	3e-52	NA	S	Function unknown
mp2_00069	COG0863	3.3e-51	DNA methylase n-4 n-6 domain protein	L	Replication, recombination and repair
mp2_00065	ENOG410ZH36	0.00035	NA	S	Function unknown
mp2_00064	ENOG410XSCY	2.7e-143	phage terminase large subunit	S	Function unknown
mp2_00066	COG3728	2.9e-46	terminase (Small subunit)	L	Replication, recombination and repair
mp2_00061	ENOG410XXAB	5.4e-11	NA	S	Function unknown
mp2_00060	ENOG4111MPU	0.00078	NA	S	Function unknown
mp2_00063	ENOG4111QNG	8.4e-98	Phage Portal Protein	S	Function unknown
mp2_00062	COG5585	9e-26	head morphogenesis protein, SPP1 gp7 family	T	Signal transduction mechanisms
mp2_01259	COG0207	2.3e-138	Provides the sole de novo source of dTMP for DNA biosynthesis (By similarity)	F	Nucleotide transport and metabolism
mp2_01258	COG0488	6.3e-146	(ABC) transporter	S	Function unknown
mp2_01255	ENOG41100D3	7.8e-61	NA	S	Function unknown
mp2_01254	COG0776	1e-42	This protein is one of the two subunits of integration host factor, a specific DNA-binding protein that functions in genetic recombination as well as in transcriptional and translational control (By similarity)	L	Replication, recombination and repair
mp2_01257	COG0617	7.3e-89	Catalyzes the addition and repair of the essential 3'- terminal CCA sequence in tRNAs without using a nucleic acid template. Adds these three nucleotides in the order of C, C, and A to the tRNA nucleotide-73, using CTP and ATP as substrates and producing inorganic pyrophosphate	J	Translation, ribosomal structure and biogenesis
mp2_01256	ENOG410YI69	1.2e-92	Pfam:Phage_integr_N	S	Function unknown
mp2_01251	COG0283	6.3e-104	Cytidine monophosphate kinase	F	Nucleotide transport and metabolism
mp2_01250	ENOG410XVT2	4.6e-23	Lysm domain protein	S	Function unknown
mp2_01253	COG1160	9.7e-196	GTPase that plays an essential role in the late steps of ribosome biogenesis (By similarity)	S	Function unknown
mp2_01252	COG0761	3.3e-110	Converts 1-hydroxy-2-methyl-2-(E)-butenyl 4-diphosphate into isopentenyl diphosphate (IPP) and dimethylallyl diphosphate (DMAPP) (By similarity)	I	Lipid transport and metabolism
mp2_01499	COG0323	2.9e-156	This protein is involved in the repair of mismatches in DNA. It is required for dam-dependent methyl-directed DNA mismatch repair. May act as a molecular matchmaker , a protein that promotes the formation of a stable complex between two or more DNA-binding proteins in an ATP-dependent manner without itself being part of a final effector complex (By similarity)	L	Replication, recombination and repair
mp2_01498	COG0632	1.1e-60	The RuvA-RuvB complex in the presence of ATP renatures cruciform structure in supercoiled DNA with palindromic sequence, indicating that it may promote strand exchange reactions in homologous recombination. RuvAB is a helicase that mediates the Holliday junction migration by localized denaturation and reannealing. RuvA stimulates, in the presence of DNA, the weak ATPase activity of RuvB (By simil…	L	Replication, recombination and repair
mp2_01493	COG0013	0	Catalyzes the attachment of alanine to tRNA(Ala) in a two-step reaction alanine is first activated by ATP to form Ala- AMP and then transferred to the acceptor end of tRNA(Ala). Also edits incorrectly charged Ser-tRNA(Ala) and Gly-tRNA(Ala) via its editing domain (By similarity)	J	Translation, ribosomal structure and biogenesis
mp2_01492	COG4472	7.4e-38	Bacterial protein of unknown function (DUF965)	S	Function unknown
mp2_01491	COG0816	8.2e-49	Could be a nuclease that resolves Holliday junction intermediates in genetic recombination (By similarity)	L	Replication, recombination and repair
mp2_01490	COG3906	1.9e-32	UPF0473 protein	S	Function unknown
mp2_01497	COG2255	7.2e-170	The RuvA-RuvB complex in the presence of ATP renatures cruciform structure in supercoiled DNA with palindromic sequence, indicating that it may promote strand exchange reactions in homologous recombination. RuvAB is a helicase that mediates the Holliday junction migration by localized denaturation and reannealing (By similarity)	L	Replication, recombination and repair
mp2_01496	COG1862	5.5e-32	preprotein translocase, yajc subunit	U	Intracellular trafficking, secretion, and vesicular transport
mp2_01495	COG0618	2.1e-72	phosphoesterase RecJ domain protein	S	Function unknown
mp2_01494	COG0513	5.4e-117	purine NTP-dependent helicase activity	L	Replication, recombination and repair
mp2_00147	COG0691	1.4e-67	Binds specifically to the SsrA RNA (tmRNA) and is required for stable association of SsrA with ribosomes (By similarity)	O	Posttranslational modification, protein turnover, chaperones
mp2_00205	COG3688	5.4e-55	Tetracycline resistance protein	S	Function unknown
mp2_00204	ENOG4112307	8.2e-41	Sigma factor	K	Transcription
mp2_00207	COG1939	4.7e-46	Involved in correct processing of both the 5' and 3' ends of 23S rRNA precursor. Processes 30S rRNA precursor transcript even in absence of ribonuclease 3 (Rnc)	S	Function unknown
mp2_00206	COG0566	5.9e-53	Methyltransferase	J	Translation, ribosomal structure and biogenesis
mp2_00201	COG0080	2.3e-46	This protein binds directly to 23S ribosomal RNA (By similarity)	J	Translation, ribosomal structure and biogenesis
mp2_00200	COG0081	2.2e-68	Binds directly to 23S rRNA. The L1 stalk is quite mobile in the ribosome, and is involved in E site tRNA release (By similarity)	J	Translation, ribosomal structure and biogenesis
mp2_00203	ENOG411034E	4.5e-19	SecE/Sec61-gamma subunits of protein translocation complex	U	Intracellular trafficking, secretion, and vesicular transport
mp2_00202	COG0250	5.6e-35	Participates in transcription elongation, termination and antitermination (By similarity)	K	Transcription
mp2_00209	COG0008	2.4e-100	Catalyzes the attachment of glutamate to tRNA(Glu) in a two-step reaction glutamate is first activated by ATP to form Glu-AMP and then transferred to the acceptor end of tRNA(Glu) (By similarity)	J	Translation, ribosomal structure and biogenesis
mp2_00208	COG0215	1.2e-206	Cysteinyl-tRNA synthetase	J	Translation, ribosomal structure and biogenesis
mp2_00518	ENOG4111IGD	3.9e-92	Response Regulator	T	Signal transduction mechanisms
mp2_00511	ENOG4111NR9	7.6e-42	Sulfite exporter TauE/SafE	S	Function unknown
mp2_00510	ENOG410XWD6	0.00077	2'-5' rna ligase	S	Function unknown
mp2_00513	COG0265	2.5e-63	Serine protease	O	Posttranslational modification, protein turnover, chaperones
mp2_00512	ENOG4111NR9	7.6e-43	Sulfite exporter TauE/SafE	S	Function unknown
mp2_00515	COG4853	1.2e-78	yycI protein	S	Function unknown
mp2_00514	COG1235	1.1e-42	domain protein	S	Function unknown
mp2_00517	COG0642	6.9e-101	Histidine kinase	T	Signal transduction mechanisms
mp2_00516	COG4863	3.8e-100	YycH protein	S	Function unknown
mp2_01109	COG0275	7.1e-126	Specifically methylates the N4 position of cytidine in position 1402 (C1402) of 16S rRNA (By similarity)	M	Cell wall/membrane/envelope biogenesis
mp2_01108	COG2001	9.1e-44	Cell division protein mraZ	S	Function unknown
mp2_01101	COG2357	1.1e-57	relA SpoT domain protein	S	Function unknown
mp2_01100	COG2761	1.8e-10	DSBA oxidoreductase	Q	Secondary metabolites biosynthesis, transport and catabolism
mp2_01103	COG0564	4.8e-62	pseudouridine synthase activity	J	Translation, ribosomal structure and biogenesis
mp2_01102	COG0061	1.5e-48	Catalyzes the phosphorylation of NAD to NADP. Utilizes ATP and other nucleoside triphosphates as well as inorganic polyphosphate as a source of phosphorus (By similarity)	G	Carbohydrate transport and metabolism
mp2_01105	COG0219	6.4e-60	Methylates the ribose at the nucleotide 34 wobble position in the two leucyl isoacceptors tRNA(Leu)(CmAA) and tRNA(Leu)(cmnm5UmAA). Catalyzes the methyl transfer from S- adenosyl-L-methionine to the 2'-OH of the wobble nucleotide (By similarity)	J	Translation, ribosomal structure and biogenesis
mp2_01104	ENOG410Z1TA	2.7e-15	Type 11 methyltransferase	S	Function unknown
mp2_01107	ENOG410Z7GA	0.00037	NA	S	Function unknown
mp2_01106	COG1674	6.9e-190	cell division protein FtsK	D	Cell cycle control, cell division, chromosome partitioning
mp2_00674	COG0083	3.7e-86	Catalyzes the ATP-dependent phosphorylation of L- homoserine to L-homoserine phosphate (By similarity)	E	Amino acid transport and metabolism
mp2_00675	COG0498	3e-133	threonine synthase	E	Amino acid transport and metabolism
mp2_00676	COG0460	2.5e-93	homoserine dehydrogenase	E	Amino acid transport and metabolism
mp2_00677	ENOG410XPIG	5.3e-56	Integrase core domain	L	Replication, recombination and repair
mp2_00670	ENOG41111G2	6.6e-05	NA	S	Function unknown
mp2_00671	ENOG4111H7R	0.00028	NA	S	Function unknown
mp2_00673	COG4492	6.3e-55	UPF0735 ACT domain-containing protein	E	Amino acid transport and metabolism
mp2_00678	ENOG4111X46	2e-35	transposase	L	Replication, recombination and repair
mp2_00679	ENOG410YUHU	2.9e-38	aggregation promoting protein	S	Function unknown
mp2_00472	COG2132	1.3e-88	Multicopper oxidase	Q	Secondary metabolites biosynthesis, transport and catabolism
mp2_00470	COG0364	2.9e-194	Glucose-6-phosphate 1-dehydrogenase	G	Carbohydrate transport and metabolism
mp2_00471	COG0362	2.9e-219	Catalyzes the oxidative decarboxylation of 6- phosphogluconate to ribulose 5-phosphate and CO(2), with concomitant reduction of NADP to NADPH (By similarity)	G	Carbohydrate transport and metabolism
mp2_00476	COG0548	1.3e-46	nag kinase	E	Amino acid transport and metabolism
mp2_00477	COG1364	6.6e-153	Catalyzes two activities which are involved in the cyclic version of arginine biosynthesis the synthesis of N- acetylglutamate from glutamate and acetyl-CoA as the acetyl donor, and of ornithine by transacetylation between N(2)-acetylornithine and glutamate (By similarity)	E	Amino acid transport and metabolism
mp2_00474	COG0078	6.8e-136	ornithine carbamoyltransferase	E	Amino acid transport and metabolism
mp2_00475	COG4992	3.6e-102	Acetylornithine aminotransferase	E	Amino acid transport and metabolism
mp2_00478	COG0002	3.2e-101	N-acetylglutamate semialdehyde dehydrogenase	E	Amino acid transport and metabolism
mp2_00479	COG0505	1.8e-148	carbamoyl-phosphate synthetase glutamine chain	F	Nucleotide transport and metabolism
mp2_00858	COG4176	1.5e-141	Glycine betaine	E	Amino acid transport and metabolism
mp2_00859	COG4175	8.5e-160	Glycine betaine	E	Amino acid transport and metabolism
mp2_00854	COG4814	1e-82	Hydrolase	S	Function unknown
mp2_00855	ENOG41101QG	2.3e-201	Major Facilitator	G	Carbohydrate transport and metabolism
mp2_00856	COG3590	4.8e-141	endothelin-converting enzyme	O	Posttranslational modification, protein turnover, chaperones
mp2_00857	COG2113	8.7e-97	Glycine betaine	E	Amino acid transport and metabolism
mp2_00850	COG0110	1.3e-51	acetyltransferase	S	Function unknown
mp2_00851	COG1292	1.6e-116	Transporter	P	Inorganic ion transport and metabolism
mp2_00852	COG1052	5.8e-81	Dehydrogenase	C	Energy production and conversion
mp2_00853	COG0024	4.9e-45	Removes the N-terminal methionine from nascent proteins (By similarity)	J	Translation, ribosomal structure and biogenesis
mp2_00698	COG0150	2.2e-156	phosphoribosylaminoimidazole synthetase	F	Nucleotide transport and metabolism
mp2_00699	COG0299	2.5e-71	phosphoribosylglycinamide formyltransferase	F	Nucleotide transport and metabolism
mp2_00692	COG0026	8.2e-142	phosphoribosylaminoimidazole carboxylase atpase subunit	F	Nucleotide transport and metabolism
mp2_00693	COG0152	2.4e-73	SAICAR synthetase	F	Nucleotide transport and metabolism
mp2_00690	COG1686	1.1e-56	Carboxypeptidase	M	Cell wall/membrane/envelope biogenesis
mp2_00691	COG0041	4.3e-82	Catalyzes the conversion of N5-carboxyaminoimidazole ribonucleotide (N5-CAIR) to 4-carboxy-5-aminoimidazole ribonucleotide (CAIR) (By similarity)	F	Nucleotide transport and metabolism
mp2_00696	COG0046	2e-233	phosphoribosylformylglycinamidine synthase	F	Nucleotide transport and metabolism
mp2_00697	COG0034	9.1e-203	glutamine phosphoribosylpyrophosphate amidotransferase	F	Nucleotide transport and metabolism
mp2_00694	COG1828	1.3e-28	phosphoribosylformylglycinamidine synthase	F	Nucleotide transport and metabolism
mp2_00695	COG0047	1.2e-82	phosphoribosylformylglycinamidine synthase	F	Nucleotide transport and metabolism
mp2_00079	COG1484	8.4e-33	IstB domain protein ATP-binding protein	L	Replication, recombination and repair
mp2_00076	ENOG410ZPEN	0.00064	spore cortex biosynthesis protein, YabQ	S	Function unknown
mp2_00077	ENOG410YR61	0.00016	NA	S	Function unknown
mp2_00074	ENOG4111FTQ	0.00044	RNA polymerase sigma factor sigma-70 family	S	Function unknown
mp2_00075	ENOG410YT6A	0.00032	NA	S	Function unknown
mp2_00073	ENOG41127K2	4.1e-58	Protein of unknown function (DUF968)	S	Function unknown
mp2_00071	ENOG410Z3ZY	1.3e-22	Transcriptional regulator, ArpU family	K	Transcription
mp2_01248	COG4955	6.5e-85	NA	S	Function unknown
mp2_01249	COG0514	2.4e-142	atp-dependent dna helicase	L	Replication, recombination and repair
mp2_01246	COG1187	1.1e-102	pseudouridine synthase activity	J	Translation, ribosomal structure and biogenesis
mp2_01247	COG3601	1.4e-38	Membrane	S	Function unknown
mp2_01244	COG1354	1.8e-63	Participates in chromosomal partition during cell division. May act via the formation of a condensin-like complex containing Smc and ScpB that pull DNA away from mid-cell into both cell halves (By similarity)	S	Function unknown
mp2_01245	COG1386	2.5e-55	Participates in chromosomal partition during cell division. May act via the formation of a condensin-like complex containing Smc and ScpA that pull DNA away from mid-cell into both cell halves (By similarity)	K	Transcription
mp2_01242	COG4973	7.3e-94	Site-specific tyrosine recombinase, which acts by catalyzing the cutting and rejoining of the recombining DNA molecules. The XerC-XerD complex is essential to convert dimers of the bacterial chromosome into monomers to permit their segregation at cell division. It also contributes to the segregational stability of plasmids (By similarity)	L	Replication, recombination and repair
mp2_01243	ENOG41102XN	1.1e-36	NA	S	Function unknown
mp2_01240	COG3848	3.7e-244	Pyruvate kinase	G	Carbohydrate transport and metabolism
mp2_01241	COG2996	9.1e-87	S1 RNA binding domain protein	S	Function unknown
mp2_01488	ENOG410Y5GJ	8.4e-38	colicin v production protein	S	Function unknown
mp2_01489	ENOG410XUW5	5.6e-29	Activator of cell division through the inhibition of FtsZ GTPase activity, therefore promoting FtsZ assembly into bundles of protofilaments necessary for the formation of the division Z ring. It is recruited early at mid-cell but it is not essential for cell division (By similarity)	S	Function unknown
mp2_01484	COG0796	7e-107	Provides the (R)-glutamate required for cell wall biosynthesis (By similarity)	M	Cell wall/membrane/envelope biogenesis
mp2_01485	ENOG41121J8	2.1e-52	hydrocarbon binding protein	S	Function unknown
mp2_01486	COG3118	8.5e-24	Thioredoxin	O	Posttranslational modification, protein turnover, chaperones
mp2_01487	COG1193	6.4e-247	muts2 protein	L	Replication, recombination and repair
mp2_01480	ENOG410XNZT	7.9e-89	Transcriptional regulator	K	Transcription
mp2_01481	COG4980	2.2e-10	general stress protein	S	Function unknown
mp2_01482	COG4768	2.8e-34	general stress protein	S	Function unknown
mp2_01483	COG0127	6e-82	Pyrophosphatase that hydrolyzes non-canonical purine nucleotides such as XTP and ITP dITP to their respective monophosphate derivatives. Might exclude non-canonical purines from DNA precursor pool, thus preventing their incorporation into DNA and avoiding chromosomal lesions (By similarity)	F	Nucleotide transport and metabolism
