# Supplementary material for: Genome sequencing and analysis of the first complete genome of Lactobacillus kunkeei strain MP2, an Apis mellifera gut isolate
Source: PeerJ. 2016 Apr 19;4:e1950. doi: 10.7717/peerj.1950 (PMC4841242; doi:10.7717/peerj.1950)
Supplement: Table S3 — Results of the BLAST search against NR of the genes found in one of the PHAST predicted islands. [file peerj-04-1950-s003.xlsx]

## Sheet: Hoja1
LOCUS	Protein	GI	Protein Iceberg	Score	Identities	Expect
mp2_00049	Phage-related minor tail protein	gi|50261625|gb|AAT72393.1	unknown [Streptococcus pyogenes]	48.7	39/231 (16%)	1.1e-09
mp2_00061	hypothetical protein	gi|328801793|emb|CBW53946.1	Hypothetical protein, predicted transmembrane protein (part of ICE) [Mycoplasma mycoides subsp. capri LC str. 95010]	46.2 bits (117)	48/197 (24%)	7.4e-06
mp2_00081	Single-stranded DNA-binding protein A {ECO:|HAMAP-Rule:MF_00984}	gi|68056843|gb|AAX87096.1	Single-strand binding protein [Haemophilus influenzae 86-028NP]	77.2	48/140 (34%)	3.4e-18
mp2_00091	ORF6C domain protein	gi|37955681|gb|AAP22520.1	putative antirepressor [Pseudomonas aeruginosa]	67.0	48/109 (44%)	4.9e-15
mp2_00094	LexA repressor {ECO:|HAMAP-Rule:MF_00015}	gi|15485441|emb|CAC67535.1	hypothetical transcriptional regulator [Streptococcus thermophilus]	56.1	54/209 (25%)	1.4e-10
mp2_00119	Integrase core domain protein	gi|163259158|emb|CAP41458.1	probable transposase [Bordetella petrii]	83.9	58/171 (33%)	3.3e-20
mp2_00466	hypothetical protein	gi|66573731|gb|AAY49141.1	conserved hypothetical protein [Xanthomonas campestris pv. campestris str. 8004]	35.0	22/95 (23%)	8.2e-05,
mp2_00525	hypothetical protein	gi|20095169|gb|AAM08035.1	putative transposase tnp391A [Providencia rettgeri]	42.4	35/131 (26%)	9.1e-06
mp2_00900	ABC-2 family transporter protein	gi|13622229|gb|AAK33969.1	conserved hypothetical protein - lantibiotic associated [Streptococcus pyogenes M1 GAS]	71.2	52/219 (23%)	2.2e-16
mp2_00901	ABC-2 family transporter protein	gi|94542067|gb|ABF32116.1|	lantibiotic transport permease protein [Streptococcus pyogenes MGAS9429]	84.3	54/201 (27%)	2.6e-20
mp2_01033	Transcription regulatory protein SNF2	gi|50261600|gb|AAT72368.1	helicase [Streptococcus pyogenes]	46.6	50/169 (29%)	4.2e-09
